1 **PharmOmics: A Species- and Tissue-specific Drug Signature Database and Online Tool**  
2 **for Drug Repurposing**

3

4 Yen-Wei Chen<sup>1,2,6</sup>, Graciél Diamante<sup>1,2,6</sup>, Jessica Ding<sup>1,3,6</sup>, Thien Xuan Nghiem<sup>1</sup>, Jessica  
5 Yang<sup>1</sup>, Sung-min Ha<sup>1</sup>, Peter Cohn<sup>1</sup>, Douglas Arneson<sup>1,4</sup>, Montgomery Blencowe<sup>1,3</sup>, Jennifer  
6 Garcia<sup>2</sup>, Nima Zaghari<sup>2</sup>, Paul Patel<sup>2</sup>, and Xia Yang<sup>1,2,3,4,5 \*</sup>

7

8 <sup>1</sup>Department of Integrative Biology and Physiology, University of California, Los Angeles,  
9 CA

10 <sup>2</sup>Interdepartmental Program of Molecular Toxicology, University of California, Los Angeles,  
11 Los Angeles, CA

12 <sup>3</sup>Interdepartmental Program of Molecular, Cellular, & Integrative Physiology, Los Angeles,  
13 Los Angeles, CA

14 <sup>4</sup>Interdepartmental Program of Bioinformatics, University of California, Los Angeles, Los  
15 Angeles, CA

16 <sup>5</sup>Institute for Quantitative and Computational Biosciences, University of California, Los  
17 Angeles, CA

18 <sup>6</sup>These authors contributed equally.

19

20 **Correspondence:**

21 \*Xia Yang, Ph.D.

22 Dept. Integrative Biology and Physiology, UCLA

23 Email: [xyang123@ucla.edu](mailto:xyang123@ucla.edu)

24

25 **Abstract**

26 Drug development has been hampered by a high failure rate in clinical trials due to efficacy  
27 or safety issues not predicted by preclinical studies in model systems. A key contributor is  
28 our incomplete understanding of drug functions across organ systems and species. Therefore,  
29 elucidating species- and tissue-specific actions of drugs can provide systems level insights  
30 into therapeutic efficacy, potential adverse effects, and interspecies differences that are  
31 necessary for more effective translational medicine. Here, we present a comprehensive drug  
32 knowledgebase and analytical tool, PharmOmics, comprised of genomic footprints of drugs  
33 in individual tissues from human, mouse, and rat transcriptome data from GEO,  
34 ArrayExpress, TG-GATEs, and DrugMatrix. Using multi-species and multi-tissue gene  
35 expression signatures as molecular indicators of drug functions, we developed gene network-  
36 based approaches for drug repositioning. We demonstrate the potential of PharmOmics to  
37 predict drugs for new disease indications and validated two predicted drugs for non-alcoholic  
38 fatty liver disease in mice. We also examined the potential of PharmOmics to identify drugs  
39 related to hepatotoxicity and nephrotoxicity. By combining tissue- and species-specific *in vivo*  
40 drug signatures with biological networks, PharmOmics serves as a complementary tool to  
41 support drug characterization.

42

43 **Key words:** PharmOmics, network medicine, tissue specificity, cross-species comparison,  
44 drug repositioning, adverse drug reactions, drug toxicity

45

## 46 **Background**

47 Drug development has been challenging and costly over the past decades due to the high  
48 failure rate in clinical trials (1). Most drugs with excellent efficacy and safety profiles in  
49 preclinical studies often encounter suboptimal efficacy or safety concerns in humans (2).  
50 This translational gap is likely attributable to our incomplete understanding of the systems  
51 level activities of drugs in individual tissues and organ systems (3) as well as the differences  
52 between humans and model systems (4).

53

54 Drug activities can be captured by gene expression patterns, commonly referred to as gene  
55 signatures. By measuring how a pharmacological agent affects the gene signature of a cell or  
56 tissue type in a particular species, we can infer the cell- or tissue-specific biological pathways  
57 involved in therapeutic processes or toxicological responses. This concept has prompted drug  
58 repositioning studies and provided important predictions for repurposing approved drugs for  
59 new disease indications (5–10). Similarly, gene signatures can reveal mechanisms underlying  
60 adverse drug reactions (ADRs) and be leveraged to predict ADRs as previously shown for  
61 liver and kidney toxicity (11–13).

62

63 A drug may affect different molecular processes between tissues, providing treatment effects  
64 in the desired target tissue(s) but causing toxicity or ADRs in other tissues. Therefore, tissue-  
65 specific drug signatures will offer a more systematic understanding of drug actions *in vivo*. In  
66 addition, rodent models have been commonly used in toxicology and preclinical studies, yet  
67 species-specific effects of drugs have been observed (14) and underlie the lack of efficacy or  
68 unexpected ADRs of certain drugs when used in humans (15). Therefore, understanding the  
69 species-specific molecular effects of drugs is of high biological importance. A detailed  
70 species- and tissue-specific drug genomic signature database will significantly improve our  
71 understanding of the molecular networks affected by drugs and facilitate network-based drug  
72 discovery and ADR prediction for translational medicine.

73

74 The potential of using gene signatures to facilitate target and toxicity identification has led to  
75 several major efforts in characterizing genomic signatures related to drug treatment (8,16–18).  
76 However, none of the existing platforms offer comprehensive cross-tissue and cross-species  
77 *in vivo* assessments of drug activities to allow predictions of drug effects on individual tissues  
78 and to help assess the translational potential of a drug based on consistencies or discrepancies  
79 between species. For instance, the comparative toxicogenomics database (CTD), a literature-  
80 based resource curating chemical-to-gene/protein associations as well as chemical-to-disease

81 and gene/protein-to-disease connections (16), lacks the cellular and tissue context of the  
82 curated interactions. More systematic, data-driven databases like CMAP (8) and LINC1000  
83 (17) focus on characterizing and cataloging the genomic footprints of more than ten thousand  
84 chemicals using *in vitro* cell lines (primarily cancer cell lines) to offer global views of  
85 molecular responses to drugs in individual cellular systems. However, these *in vitro* cell-line  
86 based gene signatures may not always capture *in vivo* tissue-specificity of drug activities. To  
87 move into *in vivo* systems, large toxicogenomics databases like TG-GATEs (19) and  
88 DrugMatrix from the National Toxicology Programs of the National Institute of  
89 Environmental Health Sciences (<https://ntp.niehs.nih.gov/drugmatrix/index.html>) have  
90 become available to provide unbiased transcriptome assessment for heart, muscle, liver, and  
91 kidney systems. However, information about other organ systems is limited. Efforts to  
92 analyze publicly deposited transcriptomic datasets in GEO (20) and ArrayExpress (21),  
93 which have broader tissue coverage, for individual drugs have been described (18), but  
94 systematic annotation and integration of species- and tissue-specific effects of drugs have not  
95 been achieved.

96

97 Here, we present a database that contains 13,382 rat, human, and mouse transcriptomic  
98 datasets across >20 tissues covering 941 drugs. We evaluated the tissue- and species-  
99 specificity of drug signatures as well as the performance of these signatures in gene network-  
100 based drug repositioning, toxicity prediction, target identification, and comparisons of  
101 molecular activities between tissues and species. The drug signatures are hosted on an  
102 interactive web server, PharmOmics, to enable public access to drug signatures and  
103 integrative analyses for drug repositioning  
104 (<http://mergeomics.research.idre.ucla.edu/runpharmomics.php>).

105

## 106 **Methods**

### 107 *Curation of tissue- and species-specific drug transcriptomic datasets*

108 As illustrated in **Figure 1**, we compiled a list of clinically relevant drugs, including 766 FDA  
109 approved drugs from Kyoto Encyclopedia of Genes and Genomes (KEGG) (16), which  
110 overlapped with drugs from the US Food and Drug Administration (FDA), European Medical  
111 Agency, and Japanese Pharmaceuticals and Medical Devices Agency, with an additional 175  
112 chemicals from TG-GATEs (19) and DrugMatrix  
113 (<https://ntp.niehs.nih.gov/drugmatrix/index.html>). The compiled drug list was queried against  
114 GEO, ArrayExpress, TG-GATEs, and DrugMatrix to identify datasets as of January 2018.  
115 Duplicated datasets between data repositories were removed. We developed a semi-



116 automated pipeline combining automated search with manual checking to identify relevant  
117 datasets for drug treatment. The automated process first extracts datasets containing drug  
118 generic names or abbreviations and then inspects the potential datasets for availability of both  
119 drug treatment and control labels in the constituent samples. We also manually checked the  
120 recorded labels identified by the automated process to validate the labels and remove  
121 potential false detections. Only datasets with  $n \geq 3$ /group in both drug treatment and control  
122 groups were included in our downstream analyses. Although a larger sample size is desired,  
123 the majority (78.7%) of drug transcriptome datasets have  $n=3$ /group, 20.9% datasets have  
124  $n=2$ /group, and <1% datasets have  $n > 3$ /group (**Supplementary Table 1**).

125

### 126 *Obtaining drug treatment signatures stratified by species and tissues*

127 Species and tissue labels were retrieved based on the metadata of each dataset. Tissue names  
128 were standardized based on the Brenda Tissue Ontology (22). We implemented a search  
129 procedure to climb the ontology tree structure to determine the suitable tissue annotations.  
130 This was done by first building a priority list of widely used tissues/organs in toxicological  
131 research using the Brenda Tissue Ontology tree system. Tissue/organ priority order was set to  
132 "kidney", "liver", "pancreas", "breast", "ovary", "adipose tissue", "cardiovascular system",  
133 "nervous system", "respiratory system", "urogenital system", "immune system",  
134 "hematopoietic system", "skeletal system", "integument" (endothelial and skin tissue),  
135 "connective tissue", "muscular system", "gland", "gastrointestinal system", and "viscus"  
136 (other non-classified tissue). Tissue terms relevant to each of these tissues or organs were  
137 curated from the ontology tree into a tissue/organ ontology table. Next, we looked up terms  
138 from our tissue/organ ontology table in the Cell/Organ/Tissue column of the metadata in each  
139 transcriptomic dataset. If a tissue/organ term was not found, we searched the title and  
140 summary columns of the metadata as well to retrieve additional information. When the search  
141 returned multiple tissue terms (for example, breast cancer cell line may be categorized as  
142 both epithelial and breast organ), we used the term with the highest priority as described  
143 above. We prioritized the tissue terms based on the relevance to toxicology to make tissue  
144 assignments unique for each dataset to reduce ambiguity. Manual checking was conducted to  
145 confirm the tissue annotation for each dataset.

146

147 For each gene expression dataset, normalized data were retrieved, and quantile distribution of  
148 the values were assessed. When a dataset was not normally distributed, log<sub>2</sub>-transformation  
149 using GEO2R (20) was applied. To identify differentially expressed genes (DEGs)  
150 representing drug signatures, two different strategies were used. First, the widely used DEG

151 analysis method LIMMA (23) was applied to obtain dose and time segregated signatures  
152 under  $FDR < 0.05$ . To overcome the low sample size issue and obtain “consensus” drug  
153 signatures for a drug/chemical, LIMMA was also applied to datasets where multiple doses  
154 and treatment durations were tested, and treatment effect were derived by combining  
155 dose/time experiments for the same drug/chemical in each study. Second, we leveraged  
156 different studies for the same drugs or chemicals in the same tissue and species to derive  
157 meta-analysis signatures. To address heterogeneity in study design, platforms, sample size,  
158 and normalization methods across different data repositories, we applied the characteristic  
159 direction method from the GeoDE package (24) to derive consistent DEGs for each drug  
160 across different data sources. GeoDE was designed to accommodate heterogenous datasets  
161 that have differing parameters and outputs between treatment and control groups. It uses a  
162 “characteristic direction” measure to identify biologically relevant genes and pathways. The  
163 normalized characteristic directions for all genes were then transformed into a non-parametric  
164 rank representation. Subsequently, gene ranks of a particular drug from the same tissue/organ  
165 system and the same organism were aggregated across datasets using the Robust Rank  
166 Aggregation method (25), a statistically controlled process to identify drug DEGs within each  
167 tissue for each species. Robust Rank Aggregation provides a non-parametric meta-analysis  
168 across different ranked lists to obtain commonly shared genes across datasets, which avoids  
169 statistical issues associated with heterogeneous datasets. It computes a null distribution based  
170 on randomized gene ranks and then compares the null distribution with the empirical gene  
171 ranks to obtain a p-value for each gene. The robust rank aggregation process was done for the  
172 upregulated and downregulated genes separately to obtain DEGs for both directions under  
173 Bonferroni-adjusted p-value  $< 0.01$ , a cutoff implemented in the Robust Rank Aggregation  
174 algorithm. To obtain species-level signatures for each drug, we further aggregated DEGs  
175 across different organs tested for each drug within each species.

176

177 Pathway analysis of individual drug signatures was conducted using Enrichr (26) by  
178 intersecting each signature with pathways or gene sets from KEGG (27) and gene ontology  
179 biological process (GOBP) terms (28). In addition, pathway enrichment analysis based on  
180 network topology analysis (29) was conducted using ROntoTools (30). Pathways at false  
181 discovery rate ( $FDR < 0.05$ ) were considered significant in both methods.

182

183 We curated 14,366 drug signatures segregated by treatment dosage and duration, tissue, and  
184 species, covering 719 drugs and chemicals, among which 544 are FDA approved. In addition,  
185 our meta signatures is a consensus of 4,349 signatures covering 551 drugs across treatment

186 regimens. In total, the entire database is based on 13,382 rat, human, and mouse  
187 transcriptomic datasets across >20 tissue or organ systems across 941 drugs and chemicals  
188 from GEO, ArrayExpress, DrugMatrix, and TG-GATEs to derive drug signatures. These rat,  
189 human, and mouse datasets cover >20 tissue or organ systems. The toxicogenomics databases  
190 TG-GATEs and DrugMatrix mainly contain liver and kidney datasets from rats, while public  
191 data repositories GEO and ArrayExpress contain datasets with broader tissue and species  
192 coverage (**Figure 2A**). Overall, the rat datasets are mainly from liver and kidney whereas  
193 human and mouse datasets also contained signatures from other tissues and organs such as  
194 breast and the nervous system (**Figure 2B**). There is also a species bias between the data  
195 repositories; GEO covered more mouse and human datasets, TG-GATEs mainly has human  
196 and rat datasets, and DrugMatrix curated more rat datasets (**Figure 2C**).

197

### 198 *Comparison of PharmOmics with existing drug signature platforms*

199 To assess the degree of agreement in drug signatures between the PharmOmics database and  
200 existing platforms, we compared PharmOmics with the CREEDS (18) and L1000FWD (31)  
201 databases, for which drug signatures are accessible (**Supplementary methods**). As shown in  
202 **Supplementary Figure 1**, both the PharmOmics dose/time-segregated signatures and the  
203 meta signatures showed better concordance with the two existing platforms than the  
204 agreement between CREEDS and L1000FWD, as reflected by higher overlap fold  
205 enrichment score and lower statistical p values. The three platforms have differences in the  
206 datasets and analytical strategies and therefore are complementary. Due to the lack of full  
207 access to CMAP signatures, we were not able to systematically compare PharmOmics against  
208 CMAP.

209

### 210 *Web server implementation of PharmOmics*

211 To allow easy data access and use of PharmOmics, we have created a freely accessible web  
212 tool deployed on the same Apache server used to host Mergeomics (32), a computational  
213 pipeline for integrative analysis of multi-omics datasets to derive disease-associated  
214 pathways, networks, and network regulators (<http://mergeomics.research.idre.ucla.edu>).

215

216 The PharmOmics web server features three functions (**Figure 3**). First, it allows queries for  
217 species- and tissue-stratified drug signatures and pathways for both the dose/time-segregated  
218 and meta signatures. Details of statistical methods (e.g, LIMMA vs characteristic direction),  
219 signature type (dose/time-segregated vs meta), and datasets used are annotated. The drug  
220 query also includes a function for DEG and pathway signature comparisons between user-

221 selected species and tissues which can be visualized and downloaded. Second, it features a  
222 network drug repositioning tool that is based on the connectivity of drug signatures in  
223 PharmOmics to user input genes such as a disease signature. This tool requires a list of genes  
224 and a gene network that can be chosen from our preloaded gene regulatory networks if  
225 relevant or a custom upload (see Applications below for details in implementation). In the  
226 output, Z-score and p-value results of network repositioning are displayed and available for  
227 download. In addition, we list the overlapping genes between drug signatures in the given  
228 network and the input genes, the drug genes with direct connections to input genes through  
229 one-edge extension, and input genes with one-edge connections to drug genes in the  
230 downloadable results file. The output page also provides network visualization which details  
231 the genes affected by a drug and their overlap with and direct connections to user input genes  
232 using Cytoscape.js. The network nodes and edges files are also available for download and  
233 can be used on Cytoscape Desktop. **Figure 4** shows the web interface of the input submission  
234 form (**Figure 4A**) and results display of the network repositioning tool using a sample liver  
235 network and a sample hyperlipidemia gene set (**Figure 4B**). Lastly, the web server offers a  
236 gene overlap-based drug repositioning tool that assesses direct overlap between drug gene  
237 signatures and user input genes. Gene overlap-based drug repositioning requires a single list  
238 of genes or separate lists of upregulated and downregulated genes and outputs the Jaccard  
239 score, odds ratio, Fisher's exact test p-value, within-species rank, and gene overlaps for drugs  
240 showing matching genes with the input genes. This gene overlap-based approach is similar to  
241 what was implemented in other drug repositioning tools, but the network-based repositioning  
242 approach is unique to PharmOmics.

243

#### 244 *Experimental methods for NAFLD drug validation*

245 Seven-week old C57BL/6 male mice were purchased from the Jackson Laboratory (Bar  
246 Harbor, ME). After acclimation the animals were randomly assigned to four experimental  
247 groups (n=7-9/group) on different diets/treatments: regular chow diet (Control) (Lab Rodent  
248 Diet 5053, St. Louis, MO), high fat high sucrose (HFHS) diet (Research Diets-D12266B,  
249 New Brunswick, NJ) to induce hepatic steatosis, a key NAFLD phenotype, HFHS diet with  
250 fluvastatin treatment (NAFLD + Flu), and HFHS diet with aspirin treatment (NAFLD + Asp).  
251 The target intake concentrations of fluvastatin and aspirin were 15mg/kg and 80 mg/kg,  
252 respectively, which were chosen based on doses used in previous studies that did not show  
253 toxicity (33,34). These experimental diets were then administered for 10 weeks. The average  
254 fluvastatin intake was 14.98 mg/kg/day, and the average aspirin intake was 79.67 mg/kg/day.

255

256 During drug treatment, metabolic phenotypes such as body weight, body fat and lean mass  
257 composition were monitored weekly. Fat and lean mass were measured with Nuclear  
258 Magnetic Resonance (NMR) Bruker minispec series mq10 machine (Bruker BioSpin,  
259 Fremont, CA). For metabolic phenotypes measured at multiple time points (body weight  
260 gain and adiposity), differences between groups were analyzed using a 2-way ANOVA  
261 followed by Sidak's multiple comparisons test. At the end of treatment, livers from all groups  
262 were weighed, flash frozen, and stored at  $-80^{\circ}\text{C}$  until lipid analysis. Hepatic lipids were  
263 extracted using the Folch method as previously described (35). The lipid extracts were  
264 analyzed by the UCLA GTM Mouse Transfer Core for triglyceride (TG), total cholesterol  
265 (TC), unesterified cholesterol (UC), and phospholipids (PL) levels by colorimetric assay from  
266 Sigma (St. Louis, MO) according to the manufacturer's instructions. All animal experiments  
267 were approved by the UCLA Animal Research Committee.

268

269

## 270 **Results**

### 271 *Evaluating the ability of PharmOmics to extract drug targets and target pathways*

272 It remains unclear whether drug DEGs reflect drug targets. To evaluate this possibility, we  
273 retrieved known targets for the drugs included in PharmOmics from the DrugBank database  
274 (36) and used three different methods to evaluate the potential of DEGs for drug target  
275 identification. The first method assessed direct gene overlaps between known drug targets  
276 and DEG signatures. The second assessed overlaps between known drug target pathways and  
277 drug DEG pathways from pathway enrichment analysis. The last method was based on  
278 whether known drug targets were within the close neighborhood of drug DEGs in molecular  
279 networks, including the STRING network (37) and tissue-specific Bayesian networks (BNs)  
280 (**Supplementary methods**). For drugs with multiple dose and time regimens, only the  
281 signature with the best performance was used in these analyses.

282

283 The drug target recovery rates using PharmOmics drug DEGs for gene overlap, pathway  
284 overlap, STRING network overlap, and liver BN overlap with liver DEGs were 22%, 59.1%,  
285 41.7%, and 60.2%, respectively, and were significantly higher than the rates using random  
286 genes (**Supplementary Table 2**). Although these rates are low, gene overlap drug target  
287 recovery rate using PharmOmics signatures was higher than using CMAP (14%) and L1000  
288 (17%) signatures, and drug target recovery was improved by pathway and network  
289 approaches. Notably, matching the tissue between DEGs and network improved the target  
290 detection rate. However, we note that while the pathway- and network-based approaches

291 increased the detection rate for true drug targets, the number of false positives was also  
292 increased. Overall, our results show that although PharmOmics has certain value in drug  
293 target and pathway retrieval as shown by better performance than random genes and other  
294 platforms, the retrieval rate is low. These results suggest that DEGs do not recover direct  
295 drug targets well but more likely reflect target-related pathways, and caution should be taken  
296 when using DEGs for target identification.

297

### 298 *Utility of PharmOmics drug signatures in retrieving known therapeutic drugs for various* 299 *diseases*

300 We next evaluate the ability of PharmOmics drug signatures to identify drugs for diseases  
301 based on overlaps or network connectivity in gene signatures matched by tissue. We  
302 hypothesized that if a drug is useful for treating a disease, the drug signatures and disease  
303 signatures likely target similar pathways and therefore have direct gene overlaps or connect  
304 extensively in gene networks. For gene overlap-based drug repositioning, we calculate the  
305 Jaccard score, gene overlap fold enrichment, and Fisher's exact test p values as the overlap  
306 measurements. For network-based drug repositioning, we used a network proximity  
307 measurement between drug and diseases genes which was previously applied to protein  
308 interaction networks and known drug targets (5) (**Supplementary methods**). Here, we used  
309 tissue-specific BNs and tested the mean shortest distance between drug DEGs and disease  
310 genes.

311

312 The performance of PharmOmics drug repositioning was assessed using hyperlipidemia as  
313 the first test case, as multiple known drugs are available as positive controls. Since  
314 hyperlipidemia is most relevant to LDL and liver tissue, we retrieved LDL causal genes and  
315 pathways in liver tissue based on LDL GWAS and liver genetic regulation of gene expression  
316 using Mergeomics (**Supplementary methods**) (38), a method that can extract causal genes,  
317 pathways, and networks for diseases (39,40). In addition to retrieving disease genes from  
318 GWAS, a hyperlipidemia signature from CTD (16) was also used as an alternative source.  
319 For each drug with different dose and treatment durations, the signature with the highest  
320 overlap with the disease signature was used to represent the drug. Gene overlap- and  
321 network-based methods using dose/time-segregated signatures had similar overall  
322 performance (~90% AUC) in identification of antihyperlipidemic drugs (**Figure 5A, 5B**), and  
323 the dose/time-segregated signatures performed better than the meta signatures when using  
324 network-based repositioning (**Figure 5C-5D**). When compared to other platforms,  
325 PharmOmics was able to retrieve higher prediction rankings for the known drugs (**Table 1**)



326 and better AUC (**Figure 5C-5D**) than CMAP and L1000 and higher balanced accuracy  
327 (**Supplementary Table 3**) than CREEDS, CMAP, and L1000. These results support the  
328 capacity of the PharmOmics platform as a drug repositioning tool.

329

330 We also examined the network overlap patterns of the top drugs consistently retrieved by the  
331 PharmOmics platform, lovastatin (ranked top 1% in both PharmOmics and CREEDS) and  
332 oxymetholone (ranked top 1% in PharmOmics and ranked as 15% in CREEDS). Both drugs  
333 targeted lipid metabolism genes (e.g. *Sqle* and *Hmgcr*) and PPAR pathways in the  
334 hyperlipidemia network (**Figure 5E, 5F**), but more lovastatin DEGs connected to disease  
335 genes compared to oxymetholone DEGs. These results support the utility of a network-based  
336 drug repositioning approach that does not require the direct retrieval of a known drug target  
337 or direct overlap of drug DEGs with disease genes.

338

339 We further evaluated the performance of PharmOmics in retrieving known drugs for other  
340 diseases. Using CTD disease signatures for hyperuricemia, we found network-based  
341 repositioning obtained 90% AUC ( $p=0.009$ ) for detection of anti-hyperuricemia drugs,  
342 whereas the gene overlap-based method did not yield a significant AUC (prediction ranks in  
343 **Supplementary Table 4**). We also queried hepatitis signatures and achieved 83% AUC ( $p<$   
344  $0.001$ ) using the network method and 79% AUC ( $p<0.001$ ) using the gene overlap method in  
345 retrieving non-steroid anti-inflammatory agents (prediction ranks in **Supplementary Table**  
346 **5**). Finally, using diabetes signatures, PharmOmics was able to predict PPAR gamma agonist  
347 drugs (79% AUC,  $p=0.04$ ), but not sulfonylurea drugs which act on the pancreatic islet to  
348 enhance insulin release (prediction ranks in **Supplementary Table 6**). We note that the  
349 paucity of drug signatures in diabetes relevant tissues/cells such as the islets and the digestive  
350 system likely explains why sulfonylurea drugs are harder to retrieve. Overall, these various  
351 test cases using known therapeutic drugs as positive controls support the utility of network-  
352 based drug repositioning for select diseases when drug signatures from the appropriate tissues  
353 are used.

354

### 355 *Use of PharmOmics to predict drugs for NAFLD*

356 After establishing the performance of PharmOmics in drug repositioning using the case  
357 studies above, we applied PharmOmics to predict potential drugs for NAFLD, for which  
358 there is currently no approved drugs. Using NAFLD steatosis signatures from a published  
359 study (40) and the CTD database (16), we predicted PPAR alpha agonists (clofibrate,  
360 fenofibrate, bezafibrate, and gemfibrozil), HMG-CoA reductase inhibitors (lovastatin,

361 fluvastatin, and simvastatin), and a PPAR gamma agonist (rosiglitazone) among the top 10%  
362 of the drug candidates (**Supplementary Table 7**). PPAR agonists have been supported as  
363 potential drugs for NAFLD (41–52). Statins have shown efficacy in animal models (34,53),  
364 although clinical results are controversial (54,55). Additional predicted drugs included aspirin,  
365 which was recently reported to be associated with reducing liver fibrosis progression (56).

366

### 367 *In vivo validation of drug repositioning predictions for NAFLD*

368 Next, we sought to experimentally validate the ability of two top ranked drugs by  
369 PharmOmics, fluvastatin and aspirin, to mitigate liver steatosis as predicted by PharmOmics  
370 and assess the accuracy of repositioning ranks. Compared to other platforms  
371 (**Supplementary Table 7**), fluvastatin was ranked high consistently in PharmOmics (top 5%),  
372 CMAP (top 1% in all cells combined, 20% in HEPG2), CREEDS (20%), and L1000 (top 1%  
373 in all cells combined, 55% in HEPG2). In comparison, aspirin was ranked higher in  
374 PharmOmics (top 5%) compared to CREEDS (30%) and CMAP (35%) and was not  
375 documented in L1000. Therefore, these predictions are relatively unique to PharmOmics.

376

377 Comparison between the mice in HFHS group (NAFLD) and the chow group (Control)  
378 confirmed HFHS induced NAFLD phenotypes including increased body weight, adiposity,  
379 and hepatic steatosis (**Supplementary Figure 2A and 2B**). Comparison of the fluvastatin  
380 and aspirin treated groups with the NAFLD group revealed significant drug effects on body  
381 weight gain for both fluvastatin ( $p < 0.0001$ ; **Figure 6A**) and aspirin ( $p < 0.0001$ ; **Figure 6B**).  
382 The adiposity phenotype (fat and lean mass ratio) also showed significant drug effects from  
383 both fluvastatin ( $p < 0.0001$ ; **Figure 6C**) and aspirin ( $p = 0.0157$ ; **Figure 6D**).

384

385 There was no significant difference in total liver weight among the groups (**Supplementary**  
386 **Figure 2C** for Control and NAFLD group comparison; **Supplementary Figure 3A and 3B**  
387 for NAFLD and drug group comparisons). As expected, the HFHS group had significantly  
388 elevated levels of liver TG compared to controls, without changes in other lipids measured  
389 such as TC, UC, and PL (**Supplementary Figure 2D**). In the drug treatment groups, both  
390 fluvastatin ( $p = 0.0044$ ) and aspirin ( $p = 0.0023$ ) induced significant decreases in hepatic TG  
391 compared to the NAFLD group, without any effect on TC, UC, and PL (**Figure 5E-5F**).

392

393 We further investigated whether the effects of the drugs on NAFLD phenotypes were  
394 confounded by food and water intake. No effect of food intake was observed in the NAFLD +  
395 Flu group; however, there was a significant decrease in food intake in the NAFLD + Asp



396 group (**Supplementary Figure 3C-3D**). No effect on water intake was found for both groups  
397 (**Supplementary Figure 3E-3F**). We next adjusted for food intake in the NAFLD phenotypic  
398 analysis for body weight gain, adiposity, and TG levels using linear regression. After the  
399 adjustment, the significant effects of fluvastatin on NAFLD phenotypes remained (body  
400 weight gain  $p=0.0306$ ; adiposity  $p=0.0022$ ; hepatic TG  $p=0.0190$ ). For aspirin, the significant  
401 effects on adiposity ( $p=0.0479$ ) and hepatic TG ( $p=0.0372$ ) remained, but the effect on body  
402 weight gain was no longer significant ( $p=0.0559$ ). Overall, food/water intake did not have  
403 major influence on treatment effects on NAFLD observed for both drugs.

404

405 Our experimental validation experiments support the efficacy of both fluvastatin and aspirin  
406 in mitigating NAFLD. The effects of fluvastatin were stronger than that of aspirin and  
407 visualization of the network overlaps between NAFLD signatures and drug signatures  
408 revealed more extensive disease network connections for fluvastatin than for aspirin (**Figure**  
409 **6G-6H**), supporting their repositioning ranks and potential mechanisms of action. The  
410 signatures of the two drugs connected to pathways involved in NAFLD such as PPAR  
411 signaling pathways, fatty acid and steroid biosynthesis (**Figure 6G-6H**).

412

#### 413 *Utility of PharmOmics drug signatures in predicting and understanding hepatotoxicity*

414 We further explored the potential of coupling PharmOmics drug signatures and tissue  
415 networks to predict liver toxicity, a major type of ADR for which both toxicity signatures and  
416 orthogonal ADR documentations from various independent databases are available for  
417 performance evaluation. We used the chemical-induced liver injury signature containing 435  
418 genes from CTD to match with PharmOmics drug signatures through liver gene networks.  
419 We then used both the histological severity from TG-GATEs and the independent FDA drug-  
420 induced liver disease (DILI) categories (“most”, “less” – moderate/mild DILI adverse  
421 reactions compared to the “most” category, and “no” DILI concern) as *in silico* independent  
422 validation of the drugs predicted by PharmOmics that match with the CTD liver toxicity  
423 signature.

424

425 First, we examined the relationship between the matching scores of PharmOmics signatures  
426 and the histological severity grading based on TG-GATEs. Both the network-based and gene  
427 overlap-based scores from PharmOmics increased with higher histological severity defined  
428 by TG-GATEs (**Figure 7A**). Next, we examined the dose-dependent effects across the TG-  
429 GATEs histological severity categories as well as the three FDA DILI categories. Our results  
430 indicated that severe histological grading occurred mainly at higher drug doses within both

431 the “less” and “most” DILI concern categories (**Figure 7B**). Analysis of the relationship  
432 between dose/time-segregated signatures and network-based PharmOmics scores indicated  
433 that drug treatment at higher doses had higher network matching ranks in PharmOmics and  
434 more severe DILI (**Figure 7C**). In addition, we tested the performance of PharmOmics in  
435 predicting hepatotoxic drugs from the FDA DILI drug database. PharmOmics dose/time-  
436 segregated signatures resulted in higher performance (67% AUC) compared to the meta  
437 signatures (60% AUC) and the other platforms tested such as CREEDS, CMAP, and L1000  
438 (AUC 50-53%; **Figure 7D; Supplementary Figure 4**). Top drug predictions based on the  
439 complete hepatotoxicity signatures were wy-14643 (experimental drug with severe  
440 histological finding in TG-GATEs), dexamethasone (moderate DILI concern category in  
441 FDA and moderate histological finding in TG-GATEs), phenobarbital (moderate DILI  
442 concern), indomethacin (“most” DILI concern), and fenofibrate (moderate DILI concern).

443

444 Since CTD curated a large number of genes (435 genes) related to chemical induced liver  
445 injury, we hypothesized that this large network could be divided into subnetworks indicative  
446 of different mechanisms towards liver toxicity, which could improve toxicity prediction for  
447 drugs with different mechanisms. We first examined network overlapping patterns of the top  
448 5 predicted drugs by using the CTD liver injury genes (**Figure 7E**) and found consistent  
449 targeting of gene subnetworks across top predictions. We then applied the Louvain clustering  
450 method to divide the liver injury network into subnetworks and filtered subnetworks with less  
451 than 10 genes to reduce uncertainty. These different subnetworks showed varying abilities in  
452 identifying drugs with DILI concerns (**Supplementary Table 8**). The best performing  
453 subnetwork showed improved AUC compared to the whole network (75% vs 67%; **Figure**  
454 **7D**). Further scrutinization of key genes documented in CTD signatures of the top performing  
455 subnetwork revealed that the antioxidant gene *GSR*, the phase 2 drug metabolizer *NAT2*, and  
456 the inflammatory response gene *IRAK1* showed the best predictability (**Supplementary**  
457 **Table 8**). These results suggest that the network-based toxicity prediction approach may help  
458 prioritize predictive genes, pathways, and subnetworks related to hepatotoxicity.

459

#### 460 ***Utility of PharmOmics drug signatures in predicting and understanding nephrotoxicity***

461 We also examined the performance of PharmOmics in predicting nephrotoxicity, another  
462 ADR for which both toxicity signature and drug ADR documentations are available from  
463 independent sources to help validate performance.

464

465 Nephrotoxicity signatures were curated from CTD using either the chronic kidney disease  
466 signature (CKD, 56 genes) or acute kidney injury signature (AKI, 120 genes), which were  
467 matched with PharmOmics drug signatures to predict drugs matching CKD or AKI signatures.  
468 The PharmOmics predictions were then validated using kidney histological severity  
469 documented by TG-GATEs or nephrotoxicity defined by DrugBank. There were 13 shared  
470 genes between CKD and AKI signatures including several inflammatory factors *TNF*,  
471 *TGFBI*, *NFKBI*, and *IL6*. We found that unlike AKI signatures, using CKD signatures  
472 against PharmOmics drug signatures resulted in network matching scores (not gene overlap  
473 scores) that agreed well with histological severity documented in TG-GATEs (**Figure 8A**).  
474 Therefore, we focused on using CKD signatures in downstream network-based analyses. We  
475 found that PharmOmics drug signatures of higher doses predicted more drugs with severe or  
476 moderate kidney histology categorized by TG-GATEs as well as drugs with nephrotoxicity as  
477 defined by DrugBank (**Figure 8B**). However, when examining the relationship between  
478 PharmOmics network scores across doses and DrugBank nephrotoxicity categories (non-  
479 nephrotoxic or nephrotoxic), the network scores did not show a significant dose-dependent  
480 relationship (**Figure 8C**). This is in contrast to the dose-dependent relationship observed for  
481 hepatotoxicity analysis (**Figure 7C**). The weaker performance of PharmOmics in  
482 nephrotoxicity prediction could be due to the smaller number of kidney drug datasets (~1k)  
483 compared to liver drug datasets (~5k) based on data availability.

484

485 Finally, we assessed the performance of PharmOmics and other tools in identifying  
486 DrugBank nephrotoxic agents. PharmOmics dose/time-segregated (64% AUC,  $p=0.001$ ) and  
487 meta databases (61% AUC,  $p=0.028$ ) both showed a significant performance (**Figure 8D**),  
488 whereas from the other tools evaluated only CMAP (63% AUC,  $p<0.001$ ) showed a  
489 significant performance (L1000 43% and CREEDS 56% AUC, non-significant). The top 5  
490 nephrotoxic drugs predicted by PharmOmics were dexamethasone (potential CKD alleviating  
491 agent) (57,58), naproxen (documented nephrotoxic drug in DrugBank), cholecalciferol  
492 (potential CKD alleviating agent) (59), beta-estradiol (potential alleviating agent in women)  
493 (60,61), and ibuprofen (documented nephrotoxic drug in DrugBank). We also examined the  
494 gene overlap patterns of the top drugs with the CKD gene network (**Figure 8E**) and found  
495 sparse overlap, which again is in contrast to the top hepatotoxicity drugs (**Figure 7E**).

496

497 Overall, our assessment of the application of PharmOmics in toxicity or ADR prediction  
498 supports its potential value but also emphasizes that PharmOmics drug signatures may have  
499 differing performance in different use cases. Several factors, including the toxicity signatures

500 used (e.g., CKD signature performed better than AKI signature for nephrotoxicity prediction),  
501 ADR/toxicity annotation (e.g., TG-GATEs or DrugBank), and signature matching method  
502 (network-based approach better than gene overlap approach) can all significantly affect the  
503 results. We also note that our network approach does not differentiate toxicity-inducing drugs  
504 from toxicity-mitigating drugs since it is based on network connectivity and not the  
505 directionality of gene signatures.

506

### 507 *Utility of meta-analysis signatures to understand tissue and species specificity*

508 We used meta signatures, which reflect the dose-independent, consistent genes affected by  
509 drugs across studies in the same tissue or species, to evaluate tissue and species specificity of  
510 drugs by analyzing the overlap in gene signatures for each drug across different tissues and  
511 species and visualized the results using UpSetR (62). As shown in **Figure 9A**, the overlap  
512 rate in the DEGs of the same drug between tissues and organs is usually less than 5%,  
513 indicating a high variability in DEGs between tissues. As an example, we examined  
514 atorvastatin, a HMGCR ( $\beta$ -Hydroxy  $\beta$ -methylglutaryl-CoA receptor) inhibitor, which has  
515 well understood mechanisms and has been broadly tested in different tissues under the human  
516 species label. We found that two DEGs (*TSC22D3*, *THBS1*) were shared across tissues  
517 (**Figure 9B**). These genes are involved in extracellular matrix and inflammation, suggesting  
518 these processes are common targets of atorvastatin across tissues. Among the pathways  
519 shared across tissues, immune related pathways were shared between blood cells and liver  
520 cells but not in prostate cells from the urogenital system (**Figure 9C, Supplementary Table**  
521 **9**). Pathway analysis indicated that steroid synthesis and drug metabolism pathways were  
522 altered primarily in liver, which is expected as the known target of statin drugs is HMGCR,  
523 the rate limiting enzyme in cholesterol biosynthesis in liver. Blood monocyte DEGs indicated  
524 changes in inflammation related pathways, while GPCR ligand binding proteins were altered  
525 in prostate cancer cells. The tissue specificity of drug meta signatures revealed through our  
526 analysis supports tissue-specific therapeutic responses and side effects and emphasizes the  
527 need for comprehensive inclusion of drug signatures from different tissue systems as  
528 implemented in the PharmOmics framework.

529

530 We also found evidence for high species specificity. As shown in **Figure 9D**, the pair-wise  
531 overlaps in DEGs between species for the same drug is generally lower than 5%. Here we  
532 chose PPAR gamma receptor agonist rosiglitazone as an example because this drug has  
533 datasets across human, rat, and mouse in PharmOmics, and its mode of actions is well-  
534 studied. As shown in **Figure 9E** and **9F**, nine genes (*CPTIC*, *AKR1B1*, *VNN1*, *ACSM3*,

535 *CD36, CPT1A, PDK4, ZNF669, ADH1C*) and several pathways (PPAR signaling and fatty  
536 acid, triacylglycerol, and ketone body metabolism) were consistently identified from liver  
537 DEGs across species (**Supplementary Table 10**), reflecting the major species-independent  
538 pharmacological effects of rosiglitazone. Bile acid related genes were altered in rat datasets,  
539 whereas retinol metabolism and adipocytokine pathways were altered in human datasets. The  
540 species-specific differences identified highlight the importance of understanding the  
541 physiological differences among model systems to facilitate drug design with better  
542 translational potential. Our cross-species comparative studies also emphasize the need to  
543 investigate drugs in multiple species, as only 21% of the unique drug-tissue pairs (236 out of  
544 1144) from PharmOmics meta signatures have data from two or more species.

545

## 546 **Discussion**

547 Here we present PharmOmics, a publicly available drug signature database along with an  
548 open-access web interface for accessing and utilizing the signatures for various applications.  
549 PharmOmics utilizes published drug-related transcriptomic datasets across multiple data  
550 repositories and provides unique tissue-, species-, and dose/time-stratified gene signatures  
551 that are more reflective of *in vivo* activities of drugs. We also developed a unique framework  
552 for drug repositioning based on tissue-specific gene network models. We examined the  
553 potential applications of PharmOmics for various utilities including drug repurposing,  
554 toxicity prediction, target identification, and comparisons of molecular activities between  
555 tissues and species. We also carried out *in silico* performance assessments across drug  
556 signature databases and *in vivo* mouse experiments to validate our network-based drug  
557 predictions for NAFLD.

558

559 Compared to the well-established CMAP and LINC1000 platforms, PharmOmics focuses  
560 more on *in vivo* settings and likely captures more physiologically relevant drug signatures to  
561 improve drug repositioning performance. Compared to a previous crowdsourcing effort  
562 which also utilizes publicly available drug datasets (18), our PharmOmics platform included  
563 more curated databases (TGGATEs + drugMatrix Affymetrix + drugMatrix Codelink  
564 datasets compared to only drugMatrix Codelink datasets from CREEDS) and involved  
565 systematic tissue, species, and treatment regimen stratification to facilitate drug repositioning.  
566 Our platform is also the only tool utilizing a gene network framework rather than direct gene  
567 overlap approach.

568

569 The use of tissue annotation with Brenda Tissue Ontology helps normalize organ labels and  
570 improves comparability of datasets. The unique tissue- and species-specific analyses  
571 implemented in PharmOmics allows for comprehensive molecular insight into the actions of  
572 drug molecules in individual tissues and species. Our results support that different species  
573 have unique drug responses in addition to shared features; therefore, drug responses obtained  
574 in animal models require caution when translating to humans. This notion agrees with the  
575 long-observed high failure rate of drug development that has primarily relied on preclinical  
576 animal models and argues for greater consideration and understanding of inter-species  
577 differences in drug actions.

578

579 In addition to tissue and species stratification, we also provide detailed dose/time-segregated  
580 drug signatures, which can help better understand the dose- and time-dependent effects of  
581 drugs through gene signature and pathway comparisons offered through our web server. By  
582 contrast, the meta-analysis signatures capture the consistent genes and pathways across  
583 treatment regimens, which likely represent core, dose/time-independent mechanisms, and  
584 help address the sample size issue of individual datasets since the majority of drug treatment  
585 datasets have  $n \leq 3$ /group. Dose/time-segregated signatures performed better than meta  
586 signatures for both drug repositioning and toxicity prediction. However, meta signatures  
587 showed better performance than CMAP, LINC1000, and CREEDs (**Figure 5, 7, 8**), and can  
588 also significantly shorten the computation time in network-based repositioning applications.  
589 For instance, computation using 1251 human meta signatures can be completed in 40 minutes,  
590 whereas using ~14,000 dose/time-segregated signatures can take 4 hours. These estimates  
591 will vary depending on input data size and server load.

592

593 Previous drug repositioning studies support the utility of a protein network-based approach  
594 for drug repositioning. Here we show that combining the drug transcriptomic signatures in  
595 PharmOmics with tissue-specific gene regulatory networks and gene signatures of diseases  
596 can retrieve known therapeutic drugs, predict potential therapeutic avenues, and predict tissue  
597 toxicity. Compared to other platforms, the use of tissue- and species-specific drug signatures  
598 along with network biology is a unique strength of PharmOmics, which enables drug  
599 prioritization based on network proximity rather than direct gene overlaps. We demonstrate  
600 in various applications that network-based analysis had a superior performance to that of  
601 gene overlap-based analysis. Moreover, the tissue-specific network connections between  
602 drugs and diseases or toxicity offer molecular and mechanistic insights into the therapeutic or  
603 toxic effects of drugs. For instance, fluvastatin showed different NAFLD overlapping



604 patterns compared to aspirin, which inferred differences in disease repositioning depending  
605 on different drug mechanisms.

606

607 In general, gene signatures of drugs reflect cascades of downstream events after drug  
608 administration. The initial drug target(s) may or may not be captured by drug DEGs due to  
609 the lack of dynamic information in the DEGs. Therefore, we explored if PharmOmics  
610 signatures as well as signatures from other platforms can be used to retrieve drug targets  
611 through integration with pathway or network information. Our results show that DEGs may  
612 help inform on the pathways affected by the drugs but retrieving the direct targets can be  
613 difficult. We caution the use of drug DEGs from any drug signature platform for direct target  
614 identification.

615

616 There are several limitations in this study. First, our computational pipeline may not be able  
617 to identify all of the drug datasets from GEO and ArrayExpress database. Variations in  
618 annotations of drug names, sample size, definition of treatment vs control groups, and  
619 tissue/cell line labeling across datasets make it challenging to design a fully automated  
620 pipeline to curate drug signatures. It is therefore crucial for GEO and ArrayExpress  
621 repositories to offer clear definitions and instructions for metadata generation in order to  
622 standardize terms across datasets to facilitate future data reuse. Secondly, the coverage of  
623 tissue, species, and treatment regimens across drugs is unbalanced, preventing a thorough  
624 comparison across tissues, species, dosages, and treatment windows. We will continue to  
625 refine the pipeline and update our PharmOmics database periodically to include more  
626 datasets as they become available to increase the coverage of datasets and drug signatures.  
627 Thirdly, the sample sizes for drug treatment studies tend to be small (majority with  
628  $n=3$ /group or less), which limit the statistical power and reliability of the drug signatures  
629 when individual studies were analyzed. This is an intrinsic limitation of existing drug studies  
630 and highlights the need for systematic efforts to increase sample sizes in such studies. To  
631 mitigate this concern and reduce the reliance on individual studies, we implemented a meta-  
632 analysis strategy to aggregate drug signatures from individual studies and derive meta  
633 signatures. However, this strategy removes dosage- and time-dependent effects. We offer  
634 both options in our database to mitigate sample size concerns through meta-analysis and  
635 retain dose and time regimen information through dose/time-segregated analysis. Fourth, our  
636 network-based applications are currently limited in the coverage of high-quality tissue  
637 specific regulatory networks and computational power. We will continue to expand and  
638 improve the tissue networks and computing environment in our web server. Lastly,

639 systematic validation efforts are needed to substantiate the value of our platform. We utilized  
640 both *in silico* performance assessments and *in vivo* experiments to validate our predictions in  
641 limited settings. We mainly focused on liver related diseases with well-documented drugs  
642 and disease signatures (hyperlipidemia, hyperuricemia, diabetes, and liver/kidney toxicity) to  
643 benchmark the utilities of PharmOmics and experimentally validated two drugs predicted for  
644 NAFLD. As with the other existing platforms such as CMAP and LINC1000, future  
645 application studies and community-based validation efforts are necessary to assess the value  
646 of PharmOmics.

647

## 648 **Conclusion**

649 We have established a new drug signature database, PharmOmics, across different species  
650 and tissues, which captures the systems level *in vivo* activities of drug molecules. In addition,  
651 we demonstrate the possible means to integrate these signatures with network biology to  
652 address drug repositioning needs for disease treatment and to predict and characterize liver  
653 and kidney injury. PharmOmics has the potential to complement other available drug  
654 signature databases to accelerate drug development and toxicology research. Our  
655 PharmOmics database and pipeline will be updated periodically to include newly available  
656 datasets to increase the coverage of the drug signatures across tissues and species. It should  
657 be noted that we aim to position PharmOmics as a data-driven compensatory tool in  
658 hypothesis generation. Integration with known drug characteristics to select drug candidates  
659 and design follow up experiments are still essential.

660

## 661 **List of abbreviations**

|     |       |                                                       |
|-----|-------|-------------------------------------------------------|
| 662 | ADR   | adverse drug reactions                                |
| 663 | CTD   | comparative toxicogenomics database                   |
| 664 | KEGG  | Kyoto Encyclopedia of Genes and Genomes               |
| 665 | DEG   | differential expressed genes                          |
| 666 | FDR   | false discovery rate                                  |
| 667 | wKDA  | weighted key driver analysis                          |
| 668 | NAFLD | non-alcoholic fatty liver disease                     |
| 669 | LDL   | low-density lipoprotein cholesterol                   |
| 670 | GWAS  | genome-wide association study                         |
| 671 | BN    | Bayesian gene regulatory network                      |
| 672 | ROC   | Receiver operating characteristic                     |
| 673 | HMGCR | $\beta$ -Hydroxy $\beta$ -methylglutaryl-CoA receptor |



674 PPAR Peroxisome proliferator-activated receptor

675 GPCR G-protein coupled receptor

676

## 677 **Declaration**

### 678 *Ethics approval and consent to participate*

679 Not applicable.

### 680 *Consent for publication*

681 Not applicable.

### 682 *Availability of data and materials*

683 Indexed dataset catalog, pre-computed gene signatures and pre-computed pathway  
684 enrichments for individual drugs are deposited to and accessible through the PharmOmics  
685 web server (<http://mergeomics.research.idre.ucla.edu/runpharmomics.php>). We also  
686 implemented functions for same-tissue between-species comparison and same-species  
687 between-tissue comparison. Direct download of select drug signatures is also enabled. In  
688 addition, network-based drug repositioning analysis and gene overlap-based drug  
689 repositioning analysis using all drug signatures are available at  
690 <http://mergeomics.research.idre.ucla.edu/runpharmomics.php>.

### 691 *Competing interests*

692 The authors declare that they have no competing interests.

### 693 *Funding*

694 YC was supported by UCLA Eureka fellowship and Burroughs Wellcome Fund Inter-school  
695 Training Program in Chronic Diseases. DA was supported by NIH-NCI National Cancer  
696 Institute (T32CA201160), UCLA dissertation year fellowship and UCLA Hyde fellowship.  
697 XY was funded by NIH DK104363 and DK117850. GD was supported by the National  
698 Institute of Environmental Health Sciences (T32ES015457) and the American Diabetes  
699 Association Postdoctoral Fellowship (1-19-PDF-007-R).

### 700 *Authors' contributions*

701 YC curated and analyzed data, constructed database, and designed and conducted application  
702 studies. GD, JY, and PC conducted validation experiments. JD, TXN, DH, and MB designed  
703 and implemented the PharmOmics web server. DA provided support in data curation and  
704 analysis. GA, JG, NZ, and PP assisted with data curation. YC, GD, JD, and XY wrote the  
705 manuscript. XY designed and supervised the research. All authors contributed to manuscript  
706 editing.

### 707 *Acknowledgements*

708 We thank Dr. Patrick Allard at UCLA for constructive input on the manuscript. We thank Dr.  
709 Avi Ma'ayan at Icahn School of Medicine at Mount Sinai for providing L1000FWD and  
710 CREEDS data for comparison.

711 **References:**

- 712 1. Morgan S, Grootendorst P, Lexchin J, Cunningham C, Greyson D. The cost of drug  
713 development: a systematic review. *Health Policy*. 2011 Apr;100(1):4–17.
- 714 2. Yu HWH. Bridging the translational gap: collaborative drug development and  
715 dispelling the stigma of commercialization. *Drug Discov Today*. 2016;21(2):299–305.
- 716 3. Lin Z, Will Y. Evaluation of Drugs With Specific Organ Toxicities in Organ-Specific  
717 Cell Lines. *Toxicol Sci*. 2011 Dec;126(1):114–27.
- 718 4. Denayer T, Stöhr T, Van Roy M. Animal models in translational medicine: Validation  
719 and prediction. *New Horizons Transl Med*. 2014;2(1):5–11.
- 720 5. Cheng F, Desai RJ, Handy DE, Wang R, Schneeweiss S, Barabási A-L, et al. Network-  
721 based approach to prediction and population-based validation of in silico drug  
722 repurposing. *Nat Commun [Internet]*. 2018;9:2691. Available from:  
723 <http://www.ncbi.nlm.nih.gov/pmc/articles/PMC6043492/>
- 724 6. Guney E, Menche J, Vidal M, Barabási A-L. Network-based in silico drug efficacy  
725 screening. *Nat Commun [Internet]*. 2016;7:10331. Available from:  
726 <http://www.ncbi.nlm.nih.gov/pmc/articles/PMC4740350/>
- 727 7. Barabasi AL, Gulbahce N, Loscalzo J. Network medicine: a network-based approach  
728 to human disease. *Nat Rev Genet*. 2010/12/18. 2011;12(1):56–68.
- 729 8. Subramanian A, Narayan R, Corsello SM, Peck DD, Natoli TE, Lu X, et al. A Next  
730 Generation Connectivity Map: L1000 Platform and the First 1,000,000 Profiles. *Cell*.  
731 2017/12/02. 2017;171(6):1437-1452.e17.
- 732 9. Hall CJ, Wicker SM, Chien A-T, Tromp A, Lawrence LM, Sun X, et al. Repositioning  
733 drugs for inflammatory disease – fishing for new anti-inflammatory agents. *Dis Model*  
734 *& Mech [Internet]*. 2014;7(9):1069. Available from:  
735 <http://dmm.biologists.org/content/7/9/1069.abstract>
- 736 10. Corbett A, Pickett J, Burns A, Corcoran J, Dunnett SB, Edison P, et al. Drug  
737 repositioning for Alzheimer's disease. *Nat Rev Drug Discov [Internet]*.  
738 2012;11:833. Available from: <http://dx.doi.org/10.1038/nrd3869>
- 739 11. Godoy P, Bolt HM. Toxicogenomic-based approaches predicting liver toxicity in vitro.  
740 *Arch Toxicol [Internet]*. 2012;86(8):1163–4. Available from:  
741 <https://doi.org/10.1007/s00204-012-0892-5>
- 742 12. Low Y, Uehara T, Minowa Y, Yamada H, Ohno Y, Urushidani T, et al. Predicting

- 743 Drug-Induced Hepatotoxicity Using QSAR and Toxicogenomics Approaches. *Chem*  
744 *Res Toxicol* [Internet]. 2011;24(8):1251–62. Available from:  
745 <https://doi.org/10.1021/tx200148a>
- 746 13. AbdulHameed MD, Ippolito DL, Stallings JD, Wallqvist A. Mining kidney  
747 toxicogenomic data by using gene co-expression modules. *BMC Genomics*.  
748 2016/10/12. 2016;17(1):790.
- 749 14. Toutain P-L, Ferran A, Bousquet-Melou A. Species differences in pharmacokinetics  
750 and pharmacodynamics. *Handb Exp Pharmacol*. 2010;(199):19–48.
- 751 15. Wong CH, Siah KW, Lo AW. Estimation of clinical trial success rates and related  
752 parameters. 2018 Jan;
- 753 16. Davis AP, Grondin CJ, Johnson RJ, Sciaky D, King BL, McMorran R, et al. The  
754 Comparative Toxicogenomics Database: update 2017. *Nucleic Acids Res* [Internet].  
755 2017;45(Database issue):D972–8. Available from:  
756 <http://www.ncbi.nlm.nih.gov/pmc/articles/PMC5210612/>
- 757 17. Wang Z, Clark NR, Ma'ayan A. Drug-induced adverse events prediction with the  
758 LINCS L1000 data. *Bioinformatics* [Internet]. 2016;32(15):2338–45. Available from:  
759 <http://dx.doi.org/10.1093/bioinformatics/btw168>
- 760 18. Wang Z, Monteiro CD, Jagodnik KM, Fernandez NF, Gundersen GW, Rouillard AD,  
761 et al. Extraction and analysis of signatures from the Gene Expression Omnibus by the  
762 crowd. *Nat Commun* [Internet]. 2016;7:12846. Available from:  
763 <http://dx.doi.org/10.1038/ncomms12846>
- 764 19. Igarashi Y, Nakatsu N, Yamashita T, Ono A, Ohno Y, Urushidani T, et al. Open TG-  
765 GATEs: a large-scale toxicogenomics database. *Nucleic Acids Res*. 2014/10/15.  
766 2015;43(Database issue):D921–7.
- 767 20. Barrett T, Wilhite SE, Ledoux P, Evangelista C, Kim IF, Tomashevsky M, et al. NCBI  
768 GEO: archive for functional genomics data sets—update. *Nucleic Acids Res* [Internet].  
769 2013;41(D1):D991–5. Available from: <http://dx.doi.org/10.1093/nar/gks1193>
- 770 21. Kolesnikov N, Hastings E, Keays M, Melnichuk O, Tang YA, Williams E, et al.  
771 ArrayExpress update—simplifying data submissions. *Nucleic Acids Res* [Internet].  
772 2015;43(D1):D1113–6. Available from: <http://dx.doi.org/10.1093/nar/gku1057>
- 773 22. Gremse M, Chang A, Schomburg I, Grote A, Scheer M, Ebeling C, et al. The  
774 BRENDA Tissue Ontology (BTO): the first all-integrating ontology of all organisms  
775 for enzyme sources. *Nucleic Acids Res* [Internet]. 2011;39(Database issue):D507–13.  
776 Available from: <http://www.ncbi.nlm.nih.gov/pmc/articles/PMC3013802/>
- 777 23. Ritchie ME, Phipson B, Wu D, Hu Y, Law CW, Shi W, et al. limma powers

- 778 differential expression analyses for RNA-sequencing and microarray studies. *Nucleic*  
779 *Acids Res.* 2015 Apr;43(7):e47–e47.
- 780 24. Clark NR, Hu KS, Feldmann AS, Kou Y, Chen EY, Duan Q, et al. The characteristic  
781 direction: a geometrical approach to identify differentially expressed genes. *BMC*  
782 *Bioinformatics* [Internet]. 2014;15:79. Available from:  
783 <https://www.ncbi.nlm.nih.gov/pubmed/24650281>
- 784 25. Kolde R, Laur S, Adler P, Vilo J. Robust rank aggregation for gene list integration and  
785 meta-analysis. *Bioinformatics* [Internet]. 2012;28(4):573–80. Available from:  
786 <https://www.ncbi.nlm.nih.gov/pubmed/22247279>
- 787 26. Kuleshov M V, Jones MR, Rouillard AD, Fernandez NF, Duan Q, Wang Z, et al.  
788 Enrichr: a comprehensive gene set enrichment analysis web server 2016 update.  
789 *Nucleic Acids Res* [Internet]. 2016;44(Web Server issue):W90–7. Available from:  
790 <http://www.ncbi.nlm.nih.gov/pmc/articles/PMC4987924/>
- 791 27. Kanehisa M, Furumichi M, Tanabe M, Sato Y, Morishima K. KEGG: new  
792 perspectives on genomes, pathways, diseases and drugs. *Nucleic Acids Res* [Internet].  
793 2017;45(Database issue):D353–61. Available from:  
794 <http://www.ncbi.nlm.nih.gov/pmc/articles/PMC5210567/>
- 795 28. Expansion of the Gene Ontology knowledgebase and resources. *Nucleic Acids Res.*  
796 2016/12/03. 2017;45(D1):D331–d338.
- 797 29. Draghici S, Khatri P, Tarca AL, Amin K, Done A, Voichita C, et al. A systems biology  
798 approach for pathway level analysis. *Genome Res.* 2007/09/04. 2007  
799 Oct;17(10):1537–45.
- 800 30. Voichita C, Ansari S, Draghici S. ROntoTools: R Onto-Tools suite. 2019.
- 801 31. Wang Z, Lachmann A, Keenan AB, Ma'ayan A. L1000FWD: fireworks visualization  
802 of drug-induced transcriptomic signatures. *Bioinformatics* [Internet]. 2018 Jun  
803 15;34(12):2150–2. Available from: <http://dx.doi.org/10.1093/bioinformatics/bty060>
- 804 32. Shu L, Zhao Y, Kurt Z, Byars SG, Tukiainen T, Kettunen J, et al. Mergeomics:  
805 multidimensional data integration to identify pathogenic perturbations to biological  
806 systems. *BMC Genomics* [Internet]. 2016;17(1):874. Available from:  
807 <http://www.ncbi.nlm.nih.gov/pubmed/27814671>
- 808 33. Zhu K, Hu M, Yuan B, Liu J-X, Liu Y. Aspirin attenuates spontaneous recurrent  
809 seizures in the chronically epileptic mice. *Neurol Res.* 2017 Aug;39(8):744–57.
- 810 34. Park HS, Jang JE, Ko MS, Woo SH, Kim BJ, Kim HS, et al. Statins Increase  
811 Mitochondrial and Peroxisomal Fatty Acid Oxidation in the Liver and Prevent Non-  
812 Alcoholic Steatohepatitis in Mice. *Diabetes Metab J.* 2016/04/21. 2016 Oct;40(5):376–

- 813 85.
- 814 35. FOLCH J, LEES M, SLOANE STANLEY GH. A simple method for the isolation and  
815 purification of total lipides from animal tissues. *J Biol Chem.* 1957 May;226(1):497–  
816 509.
- 817 36. Wishart DS, Feunang YD, Guo AC, Lo EJ, Marcu A, Grant JR, et al. DrugBank 5.0: a  
818 major update to the DrugBank database for 2018. *Nucleic Acids Res.* 2017/11/11.  
819 2018;46(D1):D1074-d1082.
- 820 37. Szklarczyk D, Morris JH, Cook H, Kuhn M, Wyder S, Simonovic M, et al. The  
821 STRING database in 2017: quality-controlled protein–protein association networks,  
822 made broadly accessible. *Nucleic Acids Res [Internet].* 2017;45(Database  
823 issue):D362–8. Available from:  
824 <http://www.ncbi.nlm.nih.gov/pmc/articles/PMC5210637/>
- 825 38. Shu L, Zhao Y, Kurt Z, Byars SG, Tukiainen T, Kettunen J, et al. Mergeomics:  
826 multidimensional data integration to identify pathogenic perturbations to biological  
827 systems. *BMC Genomics [Internet].* 2016;17(1):874. Available from:  
828 <https://doi.org/10.1186/s12864-016-3198-9>
- 829 39. Shu L, Chan KHK, Zhang G, Huan T, Kurt Z, Zhao Y, et al. Shared genetic regulatory  
830 networks for cardiovascular disease and type 2 diabetes in multiple populations of  
831 diverse ethnicities in the United States. *PLoS Genet.* 2017/09/29.  
832 2017;13(9):e1007040.
- 833 40. Chella Krishnan K, Kurt Z, Barrere-Cain R, Sabir S, Das A, Floyd R, et al. Integration  
834 of Multi-omics Data from Mouse Diversity Panel Highlights Mitochondrial  
835 Dysfunction in Non-alcoholic Fatty Liver Disease. *Cell Syst.* 2018/01/24.  
836 2018;6(1):103-115.e7.
- 837 41. Liss KHH, Finck BN. PPARs and nonalcoholic fatty liver disease. *Biochimie.* 2017  
838 May;136:65–74.
- 839 42. Abd El-Haleim EA, Bahgat AK, Saleh S. Resveratrol and fenofibrate ameliorate  
840 fructose-induced nonalcoholic steatohepatitis by modulation of genes expression.  
841 *World J Gastroenterol.* 2016 Mar;22(10):2931–48.
- 842 43. Ratziu V, Charlotte F, Bernhardt C, Giral P, Halbron M, Lenaour G, et al. Long-term  
843 efficacy of rosiglitazone in nonalcoholic steatohepatitis: results of the fatty liver  
844 improvement by rosiglitazone therapy (FLIRT 2) extension trial. *Hepatology.* 2010  
845 Feb;51(2):445–53.
- 846 44. Ratziu V, Giral P, Jacqueminet S, Charlotte F, Hartemann-Heurtier A, Serfaty L, et al.  
847 Rosiglitazone for nonalcoholic steatohepatitis: one-year results of the randomized

- 848 placebo-controlled Fatty Liver Improvement with Rosiglitazone Therapy (FLIRT)  
849 Trial. *Gastroenterology*. 2008 Jul;135(1):100–10.
- 850 45. Zhang N, Lu Y, Shen X, Bao Y, Cheng J, Chen L, et al. Fenofibrate treatment  
851 attenuated chronic endoplasmic reticulum stress in the liver of nonalcoholic fatty liver  
852 disease mice. *Pharmacology*. 2015;95(3–4):173–80.
- 853 46. Laurin J, Lindor KD, Crippin JS, Gossard A, Gores GJ, Ludwig J, et al.  
854 Ursodeoxycholic acid or clofibrate in the treatment of non-alcohol-induced  
855 steatohepatitis: a pilot study. *Hepatology*. 1996 Jun;23(6):1464–7.
- 856 47. Fernandez-Miranda C, Perez-Carreras M, Colina F, Lopez-Alonso G, Vargas C, Solis-  
857 Herruzo JA. A pilot trial of fenofibrate for the treatment of non-alcoholic fatty liver  
858 disease. *Dig Liver Dis*. 2008 Mar;40(3):200–5.
- 859 48. Hertz R, Bar-Tana J. Peroxisome proliferator-activated receptor (PPAR) alpha  
860 activation and its consequences in humans. *Toxicol Lett*. 1998 Dec;102–103:85–90.
- 861 49. Kawaguchi K, Sakaida I, Tsuchiya M, Omori K, Takami T, Okita K. Pioglitazone  
862 prevents hepatic steatosis, fibrosis, and enzyme-altered lesions in rat liver cirrhosis  
863 induced by a choline-deficient L-amino acid-defined diet. *Biochem Biophys Res  
864 Commun*. 2004 Feb;315(1):187–95.
- 865 50. Nan Y-M, Fu N, Wu W-J, Liang B-L, Wang R-Q, Zhao S-X, et al. Rosiglitazone  
866 prevents nutritional fibrosis and steatohepatitis in mice. *Scand J Gastroenterol*.  
867 2009;44(3):358–65.
- 868 51. Neuschwander-Tetri BA, Brunt EM, Wehmeier KR, Oliver D, Bacon BR. Improved  
869 nonalcoholic steatohepatitis after 48 weeks of treatment with the PPAR-gamma ligand  
870 rosiglitazone. *Hepatology*. 2003 Oct;38(4):1008–17.
- 871 52. Torres DM, Jones FJ, Shaw JC, Williams CD, Ward JA, Harrison SA. Rosiglitazone  
872 versus rosiglitazone and metformin versus rosiglitazone and losartan in the treatment  
873 of nonalcoholic steatohepatitis in humans: a 12-month randomized, prospective, open-  
874 label trial. *Hepatology*. 2011 Nov;54(5):1631–9.
- 875 53. Bravo M, Raurell I, Hide D, Fernández-Iglesias A, Gil M, Barberá A, et al. Restoration  
876 of liver sinusoidal cell phenotypes by statins improves portal hypertension and  
877 histology in rats with NASH. *Sci Rep*. 2019;9(1):20183.
- 878 54. Pastori D, Polimeni L, Baratta F, Pani A, Del Ben M, Angelico F. The efficacy and  
879 safety of statins for the treatment of non-alcoholic fatty liver disease. *Dig Liver Dis*.  
880 2015;47(1):4–11.
- 881 55. Sigler MA, Congdon L, Edwards KL. An Evidence-Based Review of Statin Use in  
882 Patients With Nonalcoholic Fatty Liver Disease. *Clin Med Insights Gastroenterol*.



- 883 2018 Jul;11:1179552218787502–1179552218787502.
- 884 56. Simon TG, Henson J, Osganian S, Masia R, Chan AT, Chung RT, et al. Daily Aspirin  
885 Use Associated With Reduced Risk For Fibrosis Progression In Patients With  
886 Nonalcoholic Fatty Liver Disease. *Clin Gastroenterol Hepatol*. 2019 May;
- 887 57. Moonen L, Geryl H, D’Haese PC, Vervaeck BA. Short-term dexamethasone treatment  
888 transiently, but not permanently, attenuates fibrosis after acute-to-chronic kidney  
889 injury. *BMC Nephrol*. 2018;19(1):343.
- 890 58. Tsunoda R, Usui J, Hoshino J, Fujii T, Suzuki S, Takaichi K, et al. Corticosteroids  
891 pulse therapy and oral corticosteroids therapy for IgA nephropathy patients with  
892 advanced chronic kidney disease: results of a multicenter, large-scale, long-term  
893 observational cohort study. *BMC Nephrol*. 2018 Sep;19(1):222.
- 894 59. Westerberg P-A, Sterner G, Ljunggren Ö, Isaksson E, Elvarson F, Dezfoulian H, et al.  
895 High doses of cholecalciferol alleviate the progression of hyperparathyroidism in  
896 patients with CKD Stages 3–4: results of a 12-week double-blind, randomized,  
897 controlled study. *Nephrol Dial Transplant*. 2018 Mar;33(3):466–71.
- 898 60. Mankhey RW, Bhatti F, Maric C. 17 $\beta$ -Estradiol replacement improves renal function  
899 and pathology associated with diabetic nephropathy. *Am J Physiol Physiol*. 2005  
900 Feb;288(2):F399–405.
- 901 61. Suzuki H, Kondo K. Chronic kidney disease in postmenopausal women. *Hypertens*  
902 *Res*. 2012;35(2):142–7.
- 903 62. Conway JR, Lex A, Gehlenborg N. UpSetR: an R package for the visualization of  
904 intersecting sets and their properties. *Bioinformatics* [Internet]. 2017;33(18):2938–40.  
905 Available from: <http://dx.doi.org/10.1093/bioinformatics/btx364>  
906

907 **Tables**

908 **Table 1.** Prediction percentile of FDA approved antihyperlipidemic drug based on hyperlipidemia signatures from MergeOmics (MO) pipeline and  
 909 CTD database across different platforms tested. HEPG2 results from both L1000 and CMAP were retrieved for tissue specificity comparison.

| Platform               | PharmOmics dose/time seg network |              | PharmOmics dose/time seg Jaccard |              | PharmOmics meta |              | CREEDS       |              | CMAP         |              | CMAP HEPG2   |              | L1000        |              | L1000 HEPG2  |              |  |
|------------------------|----------------------------------|--------------|----------------------------------|--------------|-----------------|--------------|--------------|--------------|--------------|--------------|--------------|--------------|--------------|--------------|--------------|--------------|--|
|                        | MO                               | CTD          | MO                               | CTD          | MO              | CTD          | MO           | CTD          | MO           | CTD          | MO           | CTD          | MO           | CTD          | MO           | CTD          |  |
| Disease gene signature |                                  |              |                                  |              |                 |              |              |              |              |              |              |              |              |              |              |              |  |
| Atorvastatin           | 0.951                            | 0.794        | 0.981                            | 0.957        | 0.498           | 0.316        | 0.989        | 0.82         | 0.913        | 0.164        | 0.414        | 0.31         | 0.962        | 0.668        | 0.405        | 0.307        |  |
| Bezafibrate            | 0.856                            | 0.995        | 0.901                            | 0.982        | 0.981           | 0.932        | 0.571        | 0.95         | 0.332        | 0.561        | 0.439        | 0.915        | 0.394        | 0.755        | NA           | NA           |  |
| Cerivastatin           | 0.989                            | 0.848        | 0.995                            | 0.962        | 0.798           | 0.719        | 0.986        | 0.836        | 0.879        | 0.516        | NA           | NA           | 0.967        | 0.761        | NA           | NA           |  |
| Clofibrate             | 0.965                            | 0.97         | 0.802                            | 0.927        | 0.951           | 0.992        | 0.737        | 0.986        | 0.196        | 0.291        | 0.153        | 0.433        | 0.31         | 0.615        | NA           | NA           |  |
| Clofibric acid         | 0.93                             | 0.58         | 0.949                            | 0.892        | NA              | NA           | NA           | NA           | NA           | NA           | NA           | NA           | NA           | NA           | NA           | NA           |  |
| Fenofibrate            | 0.984                            | 0.986        | 0.908                            | 0.883        | 0.954           | 0.954        | 0.797        | 0.943        | 0.121        | 0.108        | 0.229        | 0.201        | NA           | NA           | NA           | NA           |  |
| Fluvastatin            | 1                                | 0.997        | 1.000                            | 0.924        | 0.97            | 0.985        | 1            | 0.815        | 0.905        | 0.963        | 0.807        | 0.118        | 0.958        | 0.514        | 0.513        | 0.327        |  |
| Gemfibrozil            | 0.992                            | 0.962        | 0.984                            | 0.873        | 0.787           | 0.844        | 0.9          | 0.712        | 0.677        | 0.612        | NA           | NA           | 0.363        | 0.591        | NA           | NA           |  |
| Lovastatin             | 0.995                            | 0.984        | 0.986                            | 0.986        | 0.905           | 0.43         | 0.993        | 0.632        | 0.972        | 0.084        | 0.528        | 0.346        | 0.992        | 0.979        | 0.415        | 0.765        |  |
| Nafenopin              | 0.726                            | 0.943        | 0.472                            | 0.864        | NA              | NA           | 0.431        | 0.712        | NA           | NA           | NA           | NA           | NA           | NA           | NA           | NA           |  |
| Niacin                 | 0.192                            | 0.873        | 0.821                            | 0.309        | 0.137           | 0.711        | 0.719        | 0.343        | 0.671        | 0.171        | 0.606        | 0.069        | 0.107        | 0.307        | NA           | NA           |  |
| Pravastatin            | 0.894                            | 0.339        | 0.911                            | 0.862        | NA              | NA           | 0.979        | 0.854        | 0.829        | 0.669        | 0.727        | 0.934        | 0.592        | 0.717        | NA           | NA           |  |
| Simvastatin            | 0.949                            | 0.935        | 0.856                            | 0.992        | 0.916           | 0.909        | 0.996        | 0.9          | 0.972        | 0.951        | 0.844        | 0.573        | 0.987        | 0.843        | 0.595        | 0.425        |  |
| Ciprofibrate           | NA                               | NA           | NA                               | NA           | NA              | NA           | NA           | NA           | 0.685        | 0.998        | 0.84         | 0.288        | 0.292        | 0.272        | NA           | NA           |  |
| Ezetimibe              | NA                               | NA           | NA                               | NA           | NA              | NA           | NA           | NA           | 0.905        | 0.982        | 0.514        | 0.757        | 0.657        | 0.269        | 0.366        | 0.101        |  |
| Probucol               | NA                               | NA           | NA                               | NA           | NA              | NA           | NA           | NA           | 0.552        | 0.115        | 0.021        | 0.696        | 0.018        | 0.529        | NA           | NA           |  |
| Rosuvastatin           | NA                               | NA           | NA                               | NA           | NA              | NA           | NA           | NA           | 0.913        | 0.056        | 0.855        | 0.238        | 0.905        | 0.464        | NA           | NA           |  |
| <b>Median</b>          | <b>0.951</b>                     | <b>0.943</b> | <b>0.911</b>                     | <b>0.924</b> | <b>0.911</b>    | <b>0.876</b> | <b>0.94</b>  | <b>0.828</b> | <b>0.829</b> | <b>0.516</b> | <b>0.528</b> | <b>0.346</b> | <b>0.624</b> | <b>0.603</b> | <b>0.415</b> | <b>0.327</b> |  |
| <b>Mean</b>            | <b>0.879</b>                     | <b>0.862</b> | <b>0.890</b>                     | <b>0.878</b> | <b>0.79</b>     | <b>0.779</b> | <b>0.841</b> | <b>0.792</b> | <b>0.701</b> | <b>0.483</b> | <b>0.537</b> | <b>0.452</b> | <b>0.607</b> | <b>0.592</b> | <b>0.459</b> | <b>0.385</b> |  |



## 910 **Figure legends**

911 **Figure 1. PharmOmics data processing pipeline.** FDA approved drugs based on KEGG  
912 database were searched against GEO, ArrayExpress, TG-GATEs, and DrugMatrix data  
913 repositories. Additional experimental drugs and chemicals from TG-GATEs and DrugMatrix  
914 were also included. Only datasets with drug treatment and control samples were retrieved.  
915 Datasets were first annotated with tissue and species information, followed by retrieval of  
916 dose/time-segregated or meta-analysis drug signatures using two different methods.  
917 Dose/time-segregated signatures were retrieved from individual datasets using LIMMA.  
918 Meta signatures across datasets of the same drugs were obtained by first applying GeoDE to  
919 obtain a ranked gene list for each treatment experiment, followed by meta-analysis using the  
920 Robust Rank Aggregation method. These signatures were used to conduct drug repositioning  
921 analysis and hepatotoxicity/nephrotoxicity prediction based on direct gene overlaps or a gene  
922 network-based approach.

923

924 **Figure 2. Summary of available datasets based on data sources, tissues, and species.** Y-  
925 axis indicates unique dataset counts, and X-axis indicates (A) tissue and data resources, (B)  
926 tissue and species, and (C) data resources and species.

927

928 **Figure 3. PharmOmics web server.** The web server hosts drug signature and pathway  
929 queries, between-tissue and between-species drug signature comparisons, and network-based  
930 and gene overlap-based drug repositioning. Users are able to query, download, and perform  
931 drug repositioning using all species- and tissue-specific meta and dose/time-segregated  
932 signatures. Interactive results tables and network visualizations are displayed on the website  
933 and available for download.

934

935 **Figure 4. User interface of network drug repositioning web tool using sample**  
936 **hyperlipidemia gene set and sample mouse Bayesian gene regulatory network.** (A)  
937 Inputs to network drug repositioning includes i) signature type to query (meta-analyzed,  
938 dose/time-segregated with top 500 genes per signature, or dose/time-segregated with all  
939 genes), ii) network (custom upload or select a sample network), iii) species (relating to the  
940 species of the network being used), and iv) genes. In this case we choose dose/time-  
941 segregated signatures using top 500 genes, a sample liver network, mouse/rat species, and the  
942 sample hyperlipidemia gene set (loaded from 'Add sample genes'). If human gene symbols  
943 are provided with the 'Mouse/Rat' species selection, the genes will be converted to mouse/rat  
944 symbols. (B) After the job is complete, the results file is displayed on the website and

945 available for download. A subset of the drug network containing the drug genes that are first  
946 neighbors to input genes and all input genes can be visualized using the “Display Network”  
947 button which will load an interactive display of the subnetwork topology. The oxymetholone  
948 drug signature in rat liver is a top hit, and the drug network is shown on the right. Additional  
949 data in the downloadable results file include the genes that are both a drug gene and an input  
950 gene in the network, drug genes that are directly connected (first neighbor) to input genes,  
951 and input genes directly connected to drug genes.

952

953 **Figure 5. Drug repositioning for hyperlipidemia.** AUC plots for network-based  
954 repositioning and gene overlap-based repositioning in identifying anti-hyperlipidemia drugs  
955 against other drugs using (A) Mergeomics hyperlipidemia signature or (B) CTD  
956 hyperlipidemia signature. Comparison of drug repositioning performance between  
957 PharmOmics network-based approach with CREEDS (using the “combined score” generated  
958 by the enrichment analysis tool implemented in Enrichr), L1000, and CMAP query system  
959 using (C) Mergeomics hyperlipidemia signature and (D) CTD hyperlipidemia signature. For  
960 drugs with multiple datasets with different doses and treatment times, only the best  
961 performing signature was used. (E) Drug-disease subnetwork of Mergeomics hyperlipidemia  
962 signature (red) and lovastatin signature (blue) showing first neighbor (direct) connections. (F)  
963 Drug-disease subnetwork Mergeomics hyperlipidemia signature (red) and oxymetholone  
964 signature (blue) showing first neighbor connections. Wilcoxon signed rank test was used to  
965 calculate significance between gene overlap/network z-scores between groups. \*, \*\*, \*\*\*  
966 indicates  $p < 0.05$ ,  $p < 0.01$  and  $p < 0.001$  respectively.

967

968 **Figure 6. *In vivo* validation of predicted drugs Fluvastatin and Aspirin on preventing**  
969 **NAFLD phenotypes in C57BL/6J mice.** (A and B) Time course of body weight gain in  
970 mice treated with fluvastatin (A) and aspirin (B) over 10 weeks. (C and D) Time course of fat  
971 mass and muscle mass ratio (adiposity) in mice treated with fluvastatin (C) and aspirin (D)  
972 over 10 weeks. (A-D) Data were analyzed by two-way ANOVA followed by Sidak post-hoc  
973 analysis to examine treatment effects at individual time points. P value  $< 0.05$  was considered  
974 significant and is denoted by an asterisk (\*). (E and F) Quantification of lipids in the liver of  
975 mice on fluvastatin (E) and aspirin (F) treatment for 10 weeks. Triglyceride (TG), Total  
976 Cholesterol (TC), Unesterified Cholesterol (UC), Phospholipid (PL). (D and E) Data were  
977 analyzed using two-sided Student's t-test. P value  $< 0.05$  was considered significant and is  
978 denoted by an asterisk (\*). Sample size  $n = 7-9$ /group. High fat high sucrose (HFHS)  
979 group (NAFLD); HFHS with fluvastatin (NAFLD + Flu); HFHS with aspirin (NAFLD +

980 Asp). (G-H) Gene network view of fluvastatin gene signatures overlapping with NAFLD  
981 disease signatures (G) Gene network view of aspirin gene signatures overlapping with  
982 NAFLD disease signatures (H).

983

984 **Figure 7. Utility of PharmOmics drug signatures in hepatotoxicity prediction based on**  
985 **matching between PharmOmics drug signatures and hepatotoxicity signatures of drug**  
986 **induced liver injury (DILI) curated from comparative toxicogenomics database (CTD).**

987 (A) Boxplots of Jaccard score-based hepatotoxicity ranking (left) and network-based  
988 hepatotoxicity ranking (right) by PharmOmics, across four categories of liver injury  
989 histological severity defined by the independent TG-GATES database (x-axis). PharmOmics  
990 hepatotoxicity scores are higher for more severe liver injury categories. (B) PharmOmics  
991 hepatotoxicity prediction scores based on gene signatures of higher drug doses correspond to  
992 more severe liver injury categories defined by TG-GATES across three DILI concern  
993 categories (“no”, “less”, “most”) defined by FDA. (C) Boxplots of network-based  
994 hepatotoxicity scores show increased scores at higher doses across three FDA DILI concern  
995 categories. (D) ROC curves comparing PharmOmics with other tools in predicting  
996 hepatotoxic drugs from the FDA DILI drug database. For PharmOmics, three sets of tests  
997 were performed, where dose/time-segregated drug signatures, meta signatures, or a  
998 hepatotoxicity subnetwork was used. (E) Liver hepatotoxicity network based on CTD  
999 hepatotoxicity genes and its overlap with drug signatures of 4 of the top 5 predicted drugs by  
1000 PharmOmics which had >50 signature genes. Phenobarbital was among the top 5 drugs but  
1001 was not included in the figure due to its small DEG size. Colors of the network nodes denote  
1002 the different drugs targeting the genes. The top 3 predictive subnetworks are depicted in red  
1003 (D). ANOVA test followed by post-hoc analysis was used for statistics in A and C. \*, \*\*, \*\*\*  
1004 indicates  $p < 0.05$ ,  $p < 0.01$  and  $p < 0.001$  respectively. Boxplots show interquartile range  
1005 (IQR) and median values (line inside the box). IQR was defined as between 25th (Q1) and  
1006 75th (Q3) percentile. The upper and lower bars indicate the points within  $Q3 + 1.5 \cdot IQR$  and  
1007  $Q1 - 1.5 \cdot IQR$ , respectively.

1008

1009 **Figure 8. Utility of PharmOmics drug signatures in nephrotoxicity prediction based on**  
1010 **matching between PharmOmics drug signatures and nephrotoxicity signatures of**  
1011 **chemical induced acute kidney injury (AKI) or chronic kidney disease (CKD) from**  
1012 **comparative toxicogenomics database (CTD).** (A) Boxplots of Jaccard score-based  
1013 nephrotoxicity ranking (left) and network-based nephrotoxicity ranking (right) by  
1014 PharmOmics, based on matching with AKI (top) or CKD (bottom) nephrotoxicity genes from

1015 CTD, across four categories of kidney histological severity defined by the independent TG-  
1016 GATEs database. Network-based nephrotoxicity prediction by PharmOmics showed a  
1017 positive relationship between nephrotoxicity scores by PharmOmics and kidney histology  
1018 severity defined by TG-GATEs. (B) PharmOmics nephrotoxicity prediction scores based on  
1019 gene signatures of higher drug doses correspond to more severe kidney injury categories  
1020 defined by TG-GATEs, segregated by nephrotoxic labels defined by DrugBank. (C) Boxplot  
1021 of network-based nephrotoxicity scores, using CKD nephrotoxicity genes against  
1022 PharmOmics drug signatures, did not show significant dose-dependent trend in non-  
1023 nephrotoxic drugs or nephrotoxic drugs defined by DrugBank. The low dose treatment group  
1024 for the nephrotoxic drugs did not contain drug signatures with more than 10 genes and  
1025 therefore the scores were not plotted. (D) ROC curve comparing the performance of  
1026 PharmOmics with other tools in predicting nephrotoxic agents in DrugBank. For  
1027 PharmOmics, two sets of tests were performed, where either dose/time-segregated drug  
1028 signatures or meta signatures was used. (E) Kidney nephrotoxicity network based on CTD  
1029 nephrotoxicity genes and the network overlap with drug signatures of top 5 drugs predicted  
1030 by PharmOmics. Colors of the network nodes denote the various drugs targeting the genes.  
1031 ANOVA test with post-hoc analysis was used for statistics in A and C. \*, \*\*, \*\*\* indicates  $p$   
1032  $< 0.05$ ,  $p < 0.01$  and  $p < 0.001$  respectively. Boxplots show interquartile range (IQR) and  
1033 median values (line inside the box), with IQR defined as between 25th (Q1) and 75th (Q3)  
1034 percentile.

1035

1036 **Figure 9. Cross-tissue and cross-species comparisons of drug signatures in**  
1037 **PharmOmics.** (A) Distribution of drug signature overlap percentages between tissue pairs in  
1038 matching species from PharmOmics. Arrow points to the pairs of tissues for drugs with high  
1039 overlap in gene signatures. (B) Upset plot of cross-tissue comparison for atorvastatin  
1040 signatures genes. Y-axis indicates number of genes. (C) Upset plot of cross-tissue comparison  
1041 for pathways enriched in atorvastatin signatures. Y-axis indicates number of pathways. (D)  
1042 Distribution of drug signature overlap percentages between pairs of species for matching  
1043 tissues from PharmOmics. Arrow points to the species pair with high gene signature overlap  
1044 for a matching drug. (E) Upset plot of cross-species comparison for rosiglitazone liver gene  
1045 signatures. (F) Upset plot of cross-species comparison for pathways enriched in rosiglitazone  
1046 liver signatures. Pairs of tissues with shared drug signature genes or pathways are connected  
1047 with black vertical lines in the bottom portion of the Upset plots.

1048

1049 **Figures**

1050 **Figure 1.**

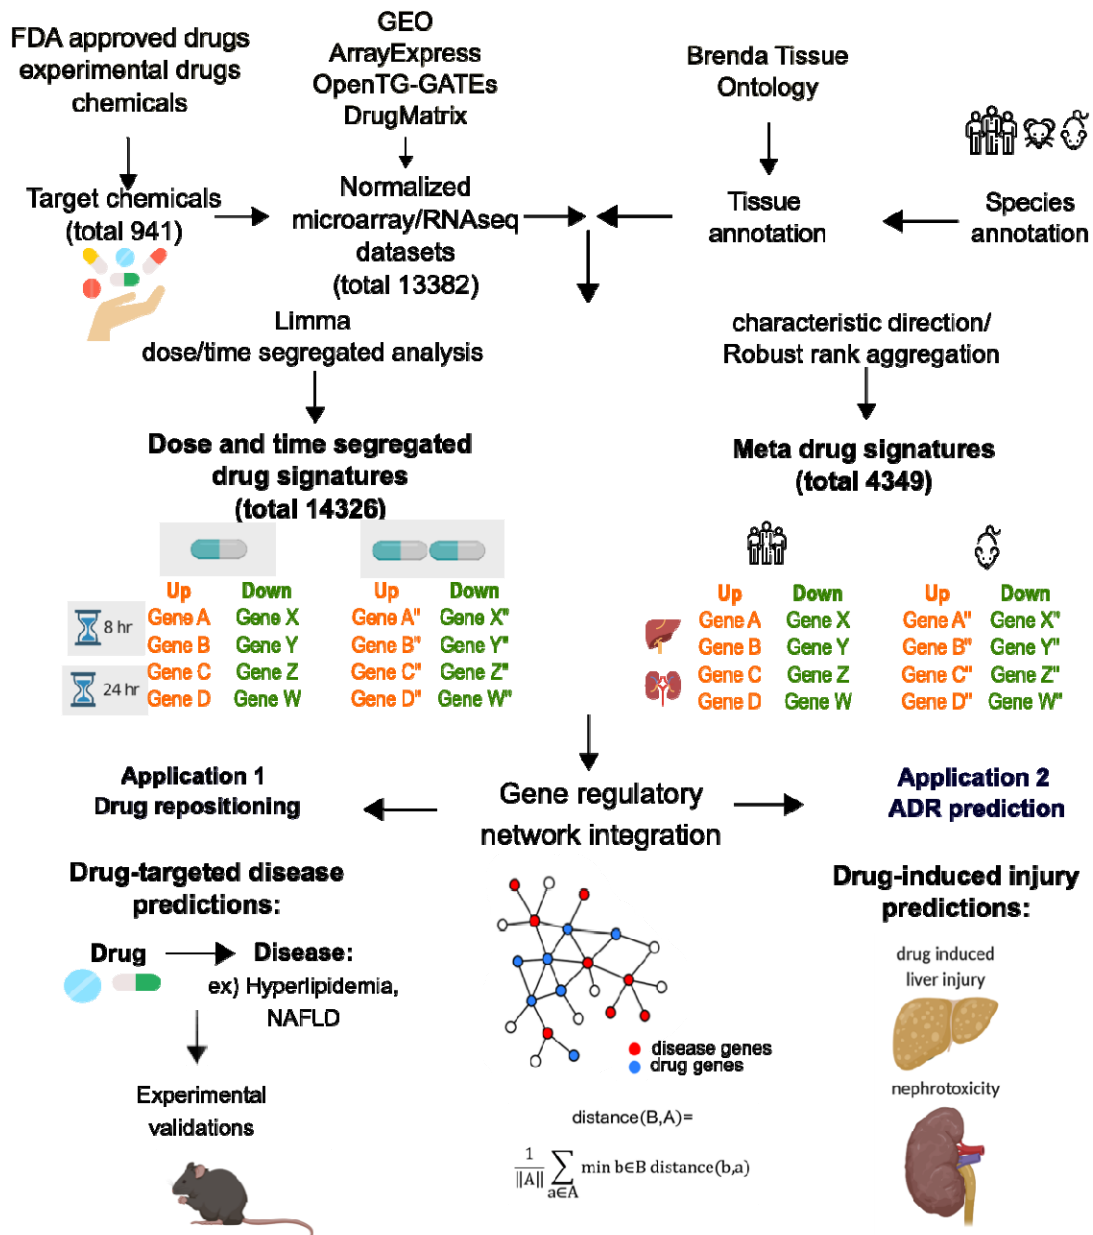

1051

1052 **Figure 2.**

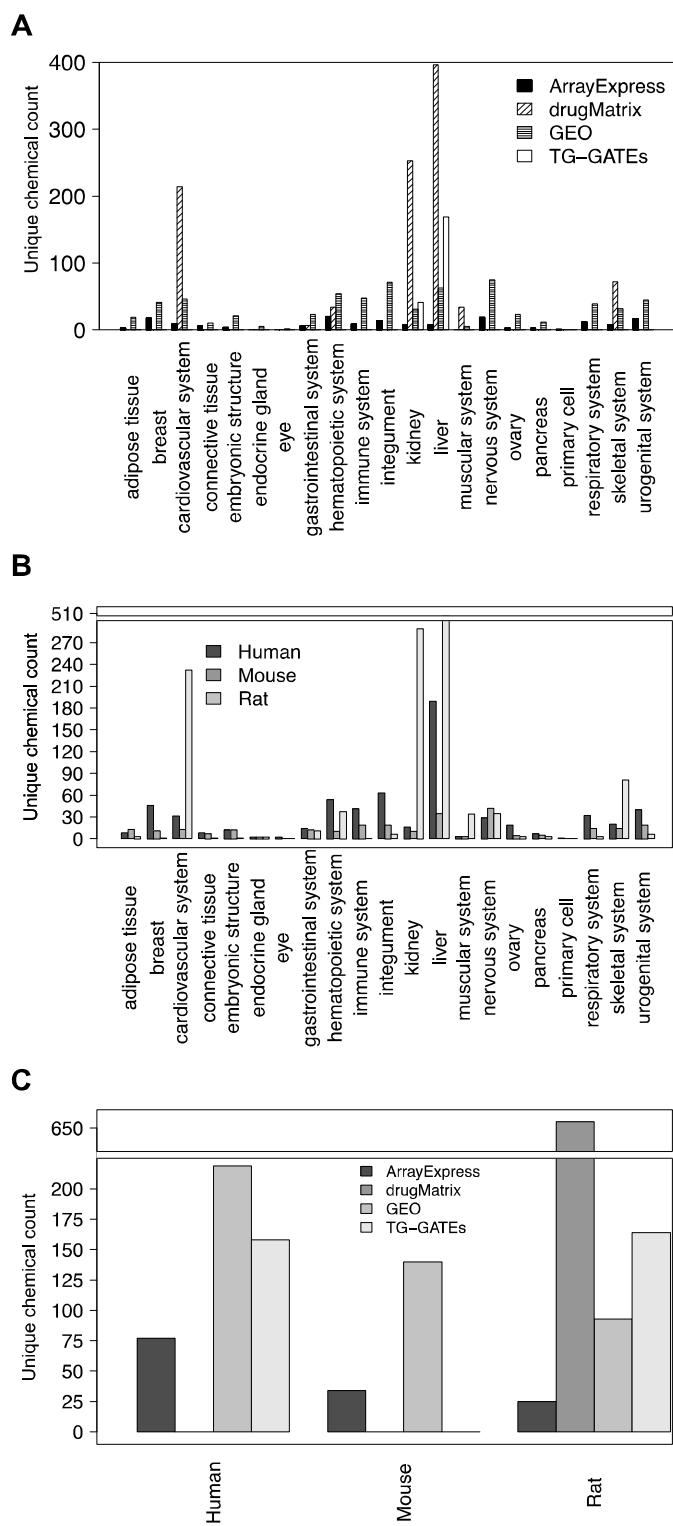

1053

1054 **Figure 3.**

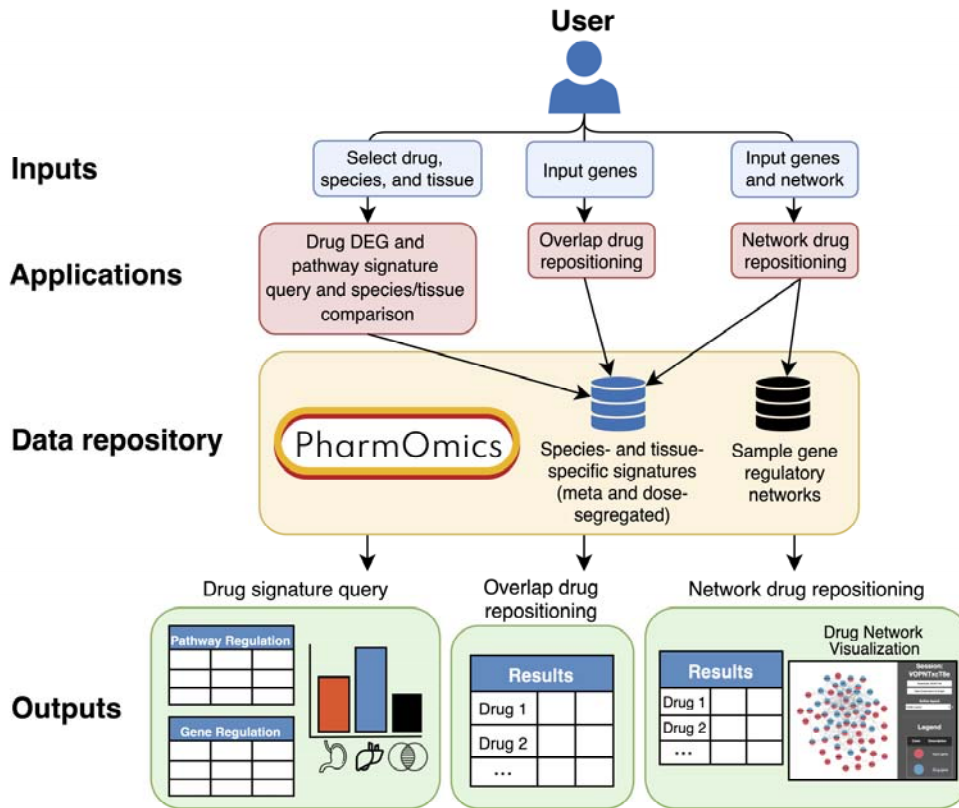

1055

1056



1057 **Figure 4.**

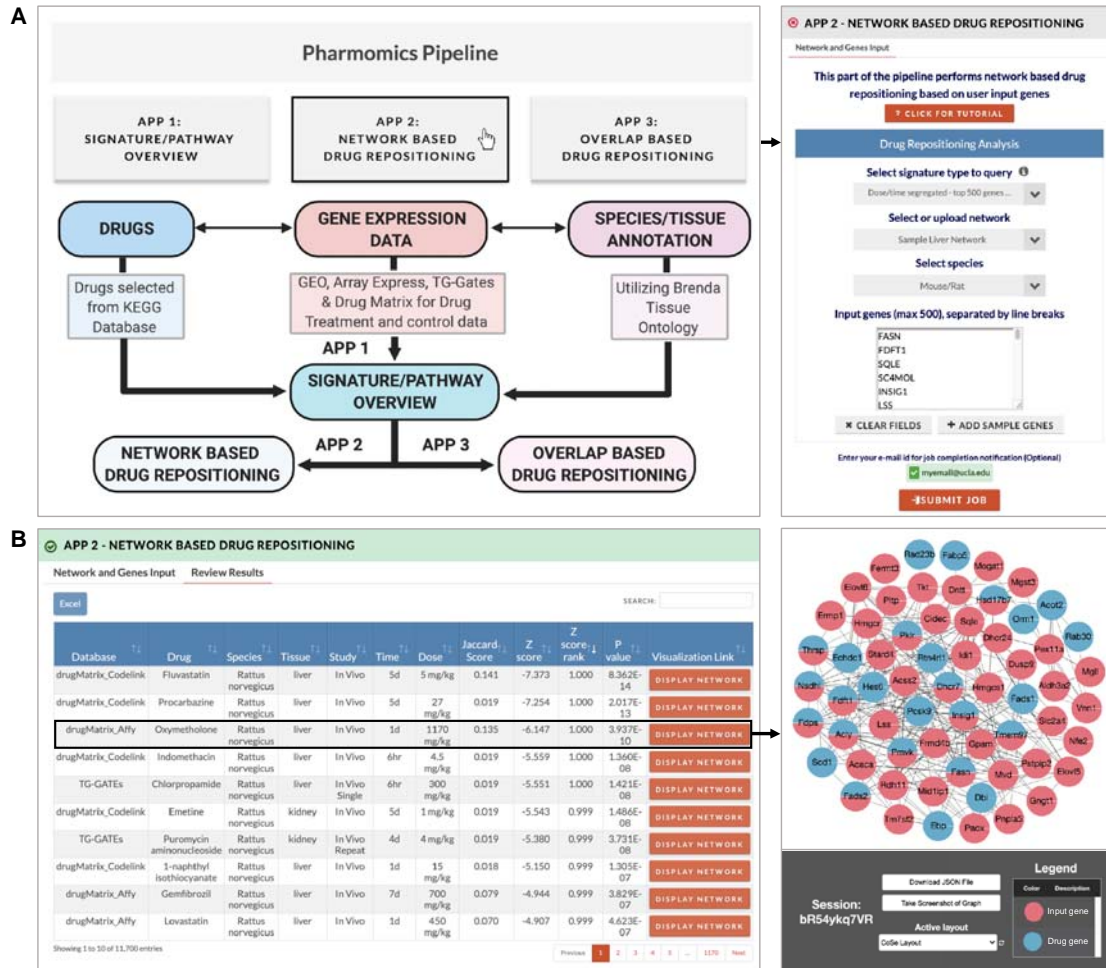

1058  
1059  
1060  
1061  
1062  
1063  
1064  
1065  
1066  
1067  
1068  
1069  
1070  
1071  
1072



1073 **Figure 5.**

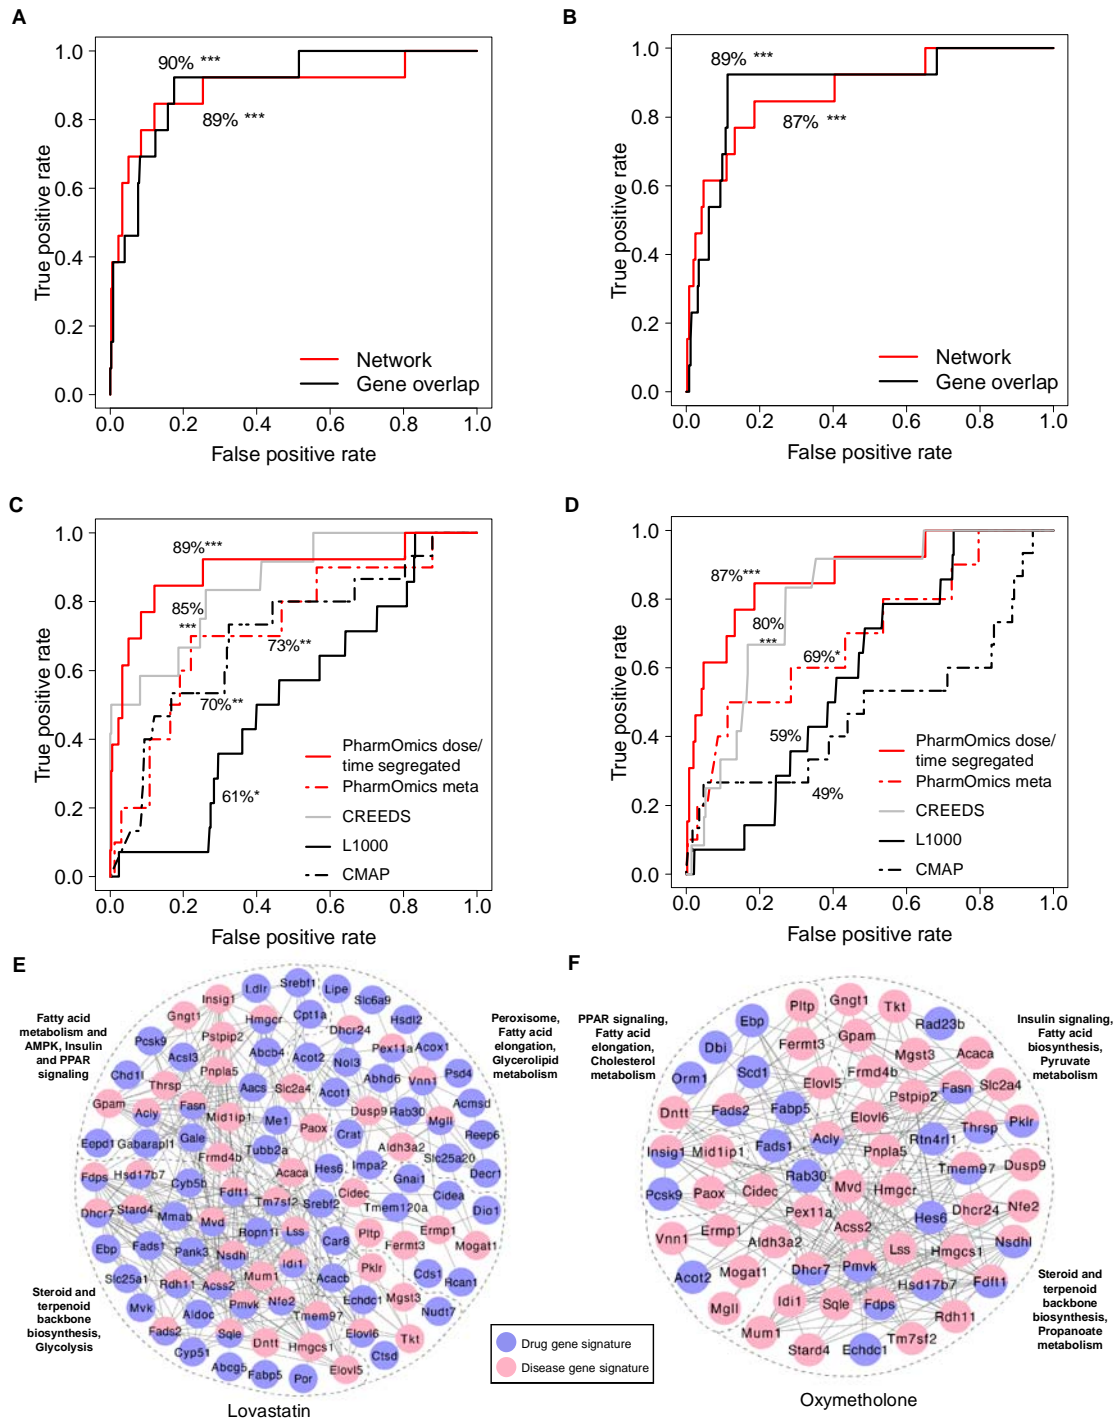

1074  
1075  
1076  
1077  
1078  
1079

1080 **Figure 6.**

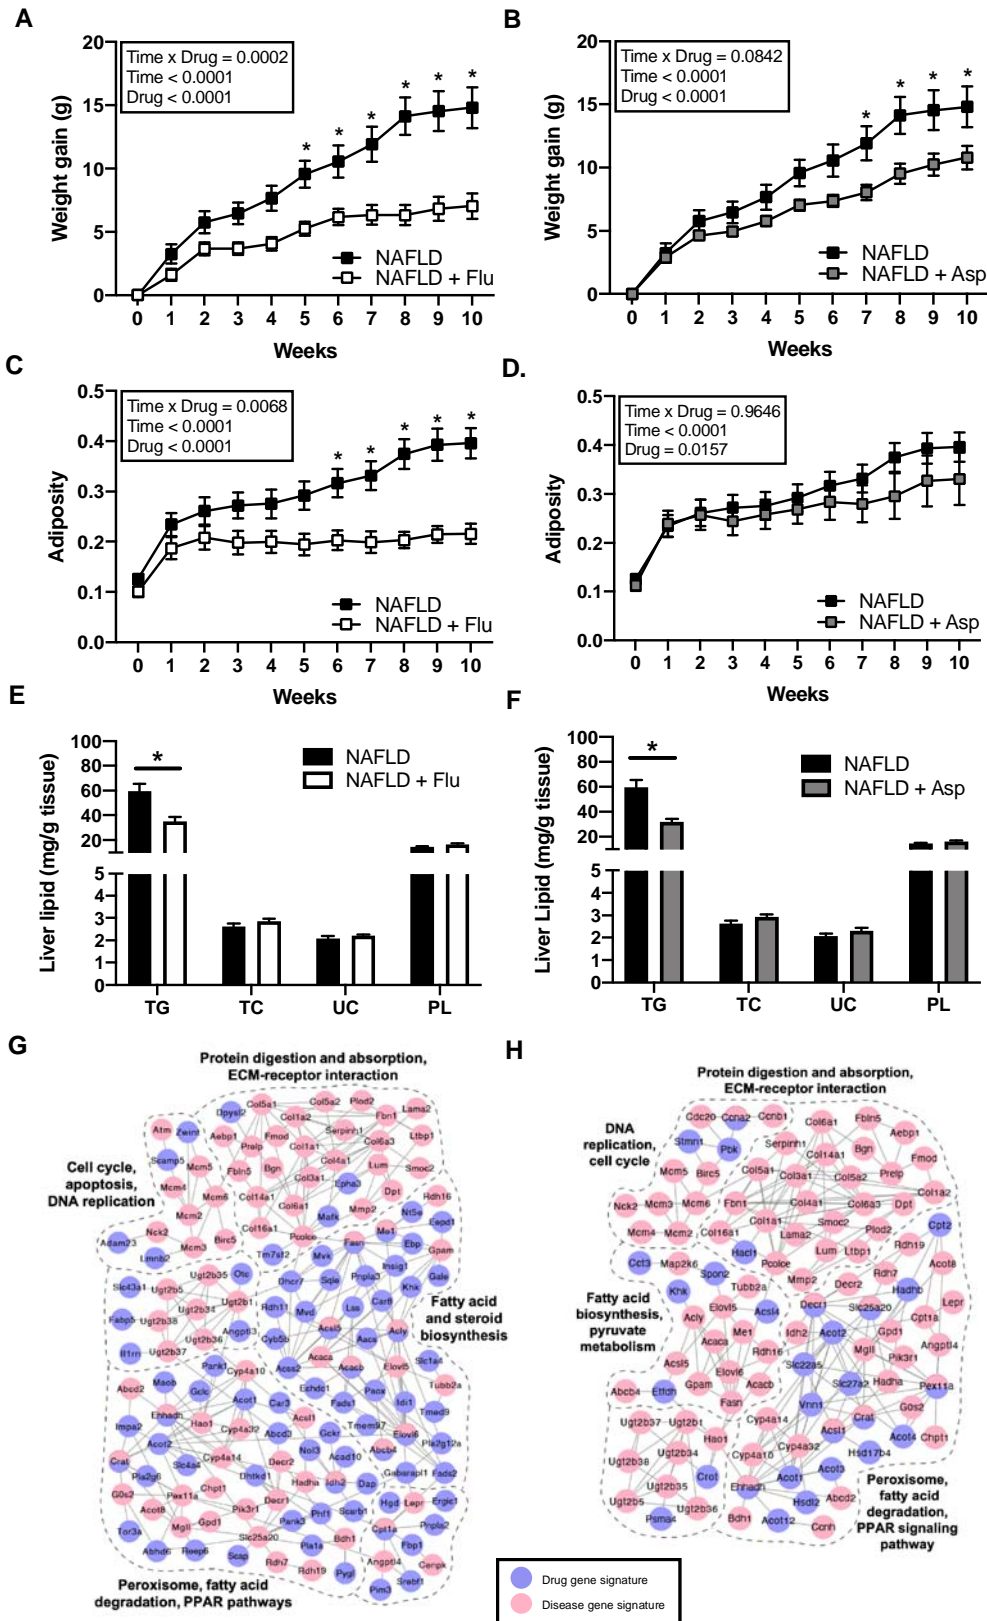

1081  
1082

1083 **Figure 7.**

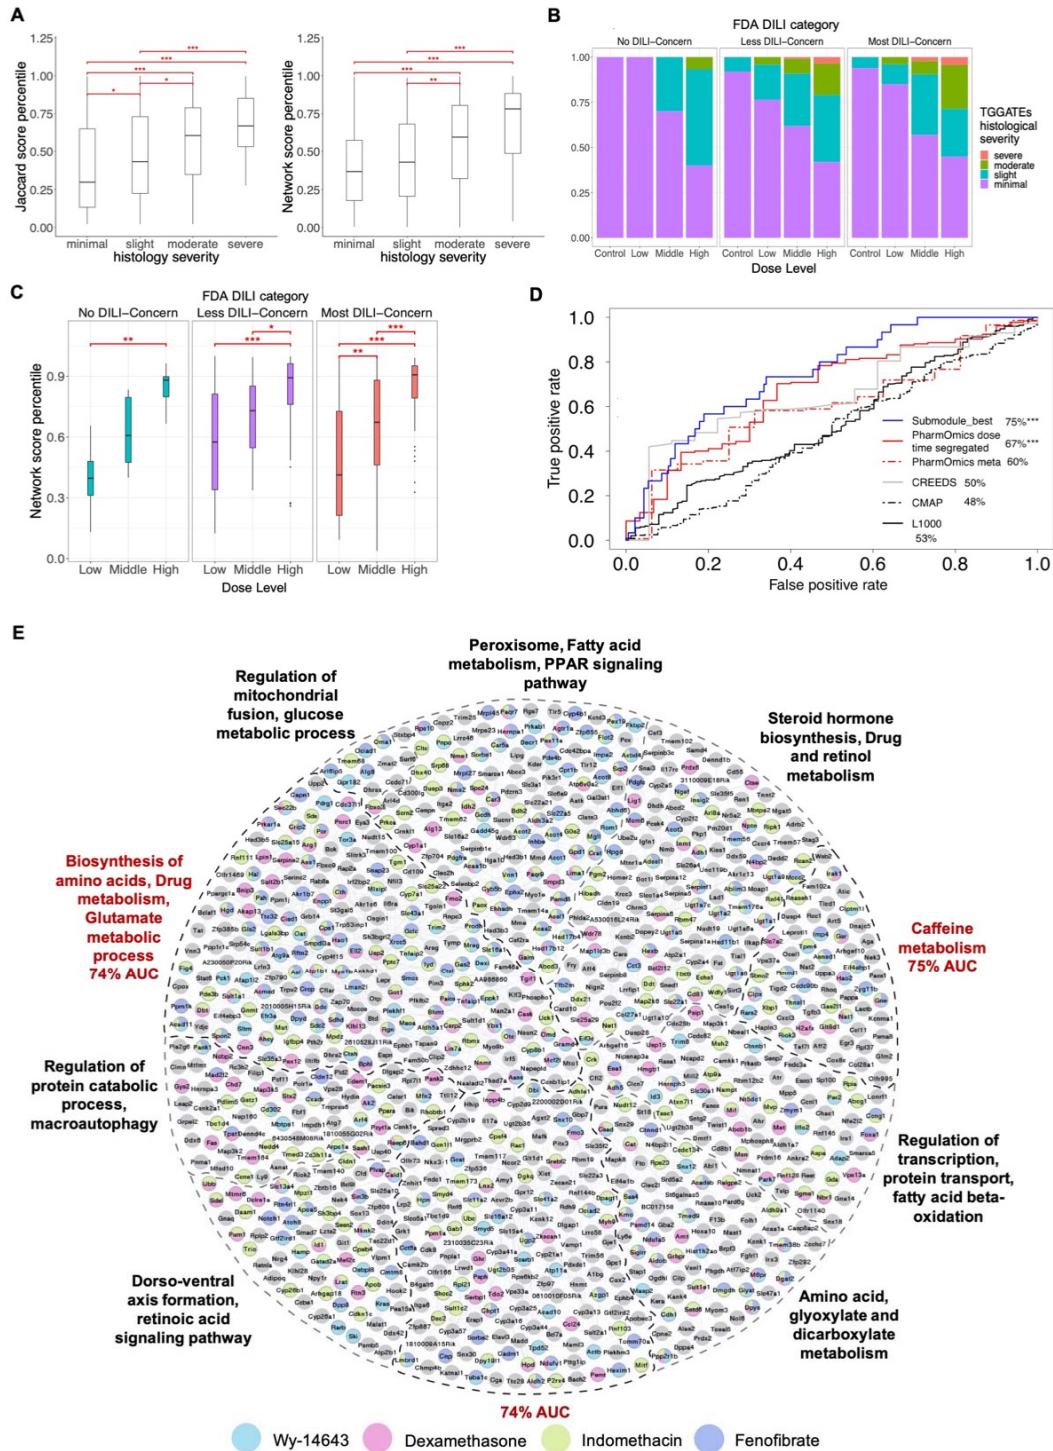

1084

1085

1086

1087

1088

1089 **Figure 8.**

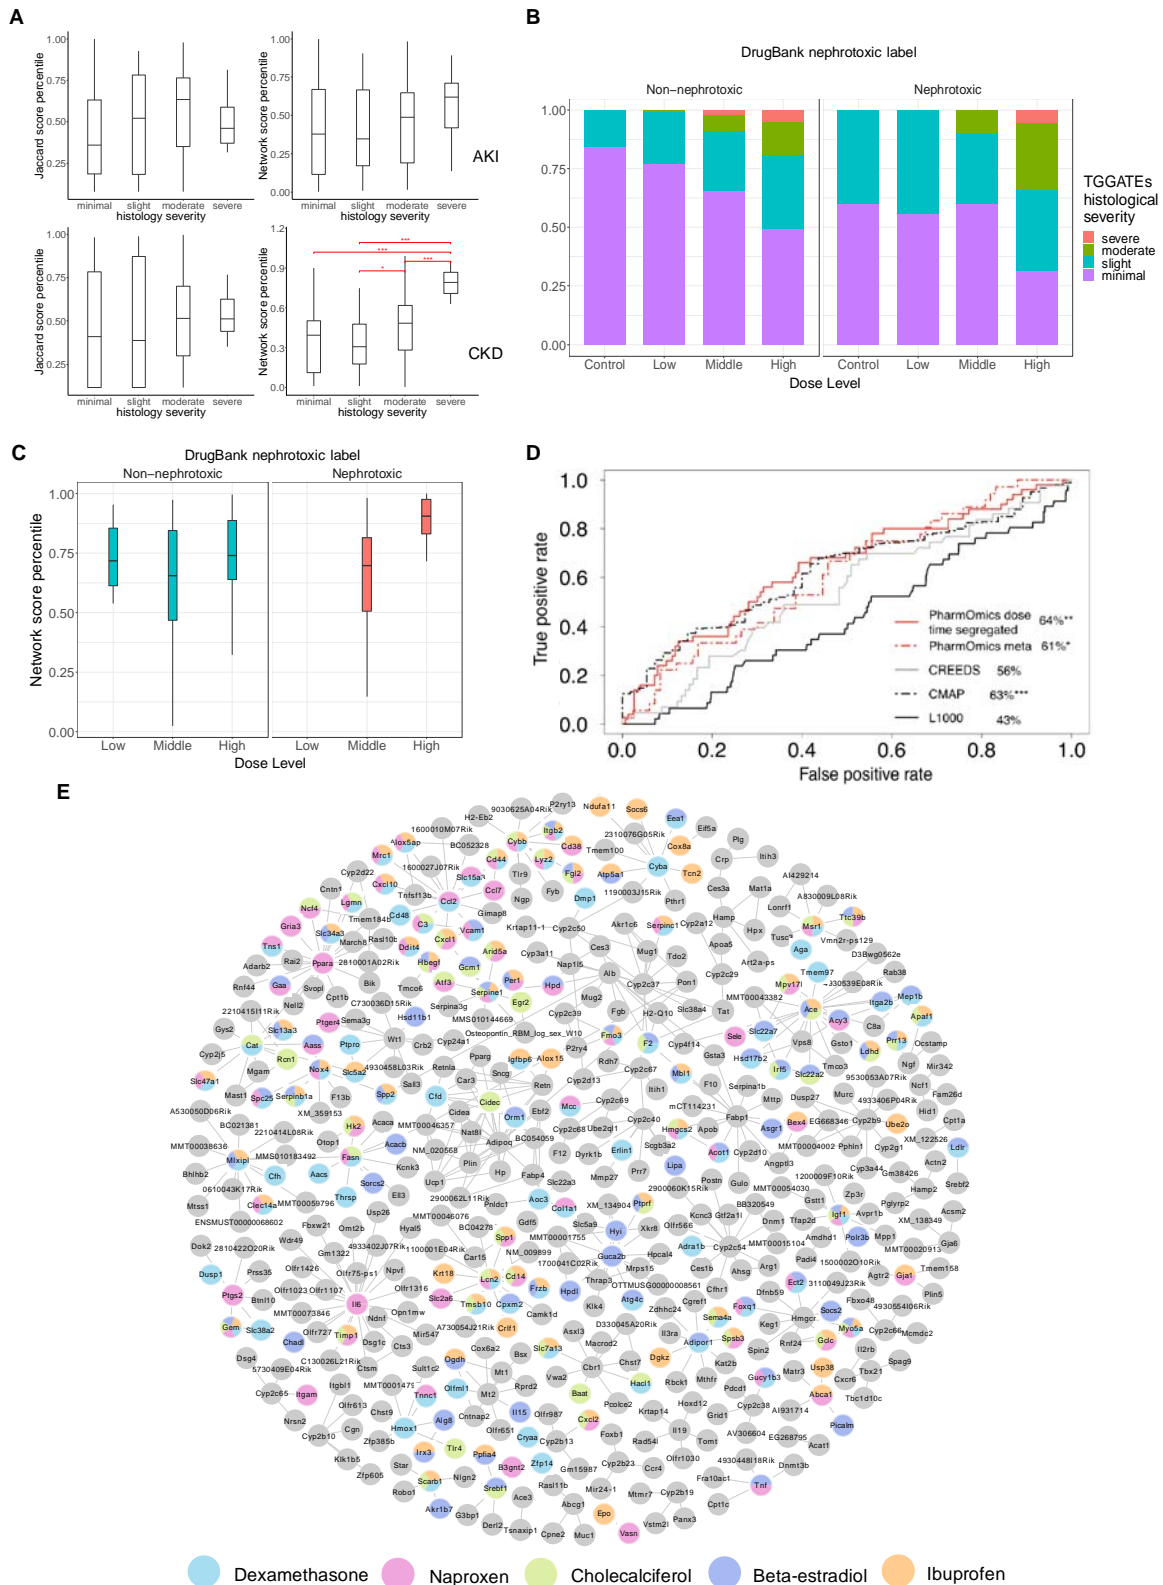

1090

1091

1092



1093 **Figure 9.**

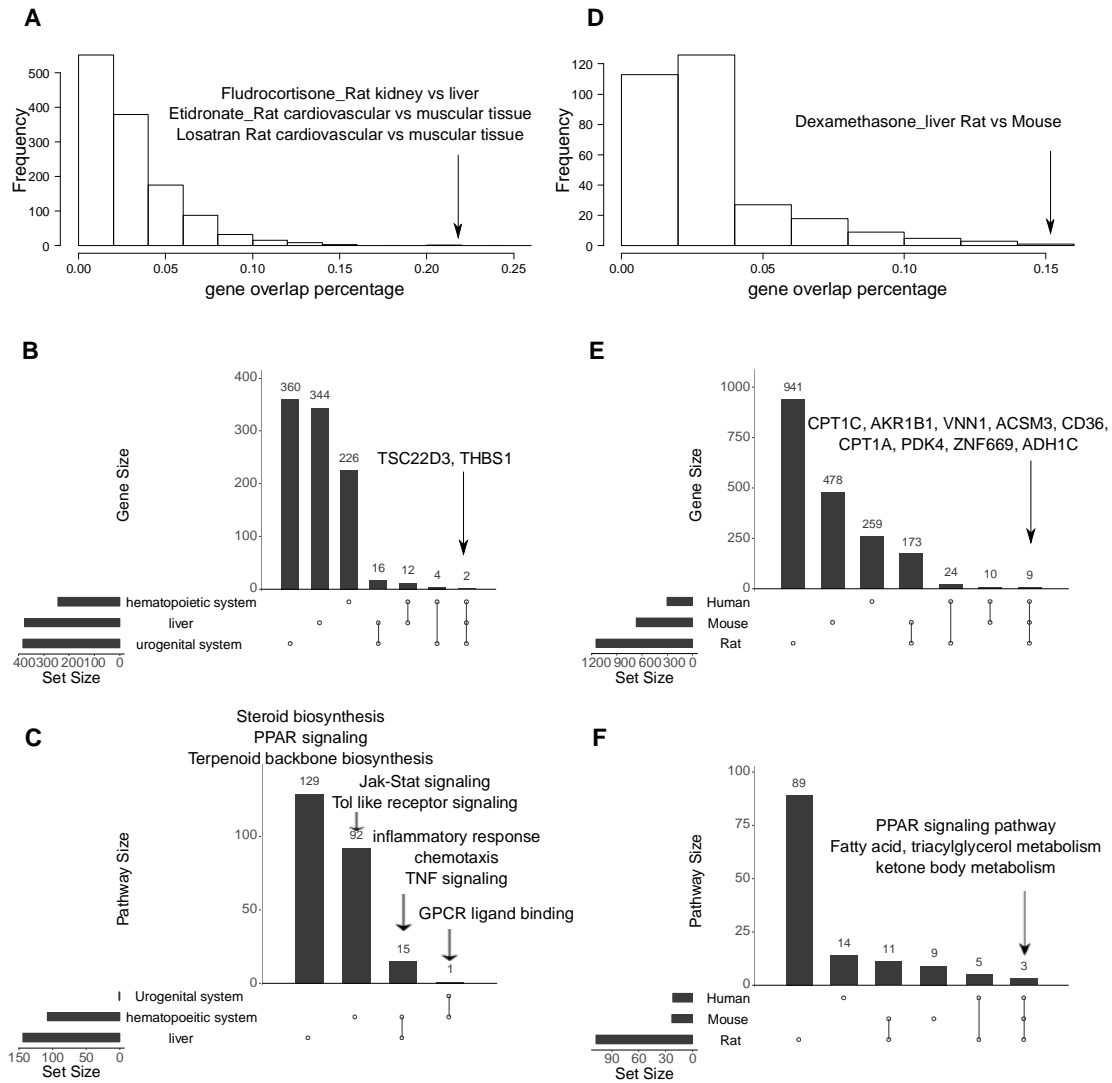

1094

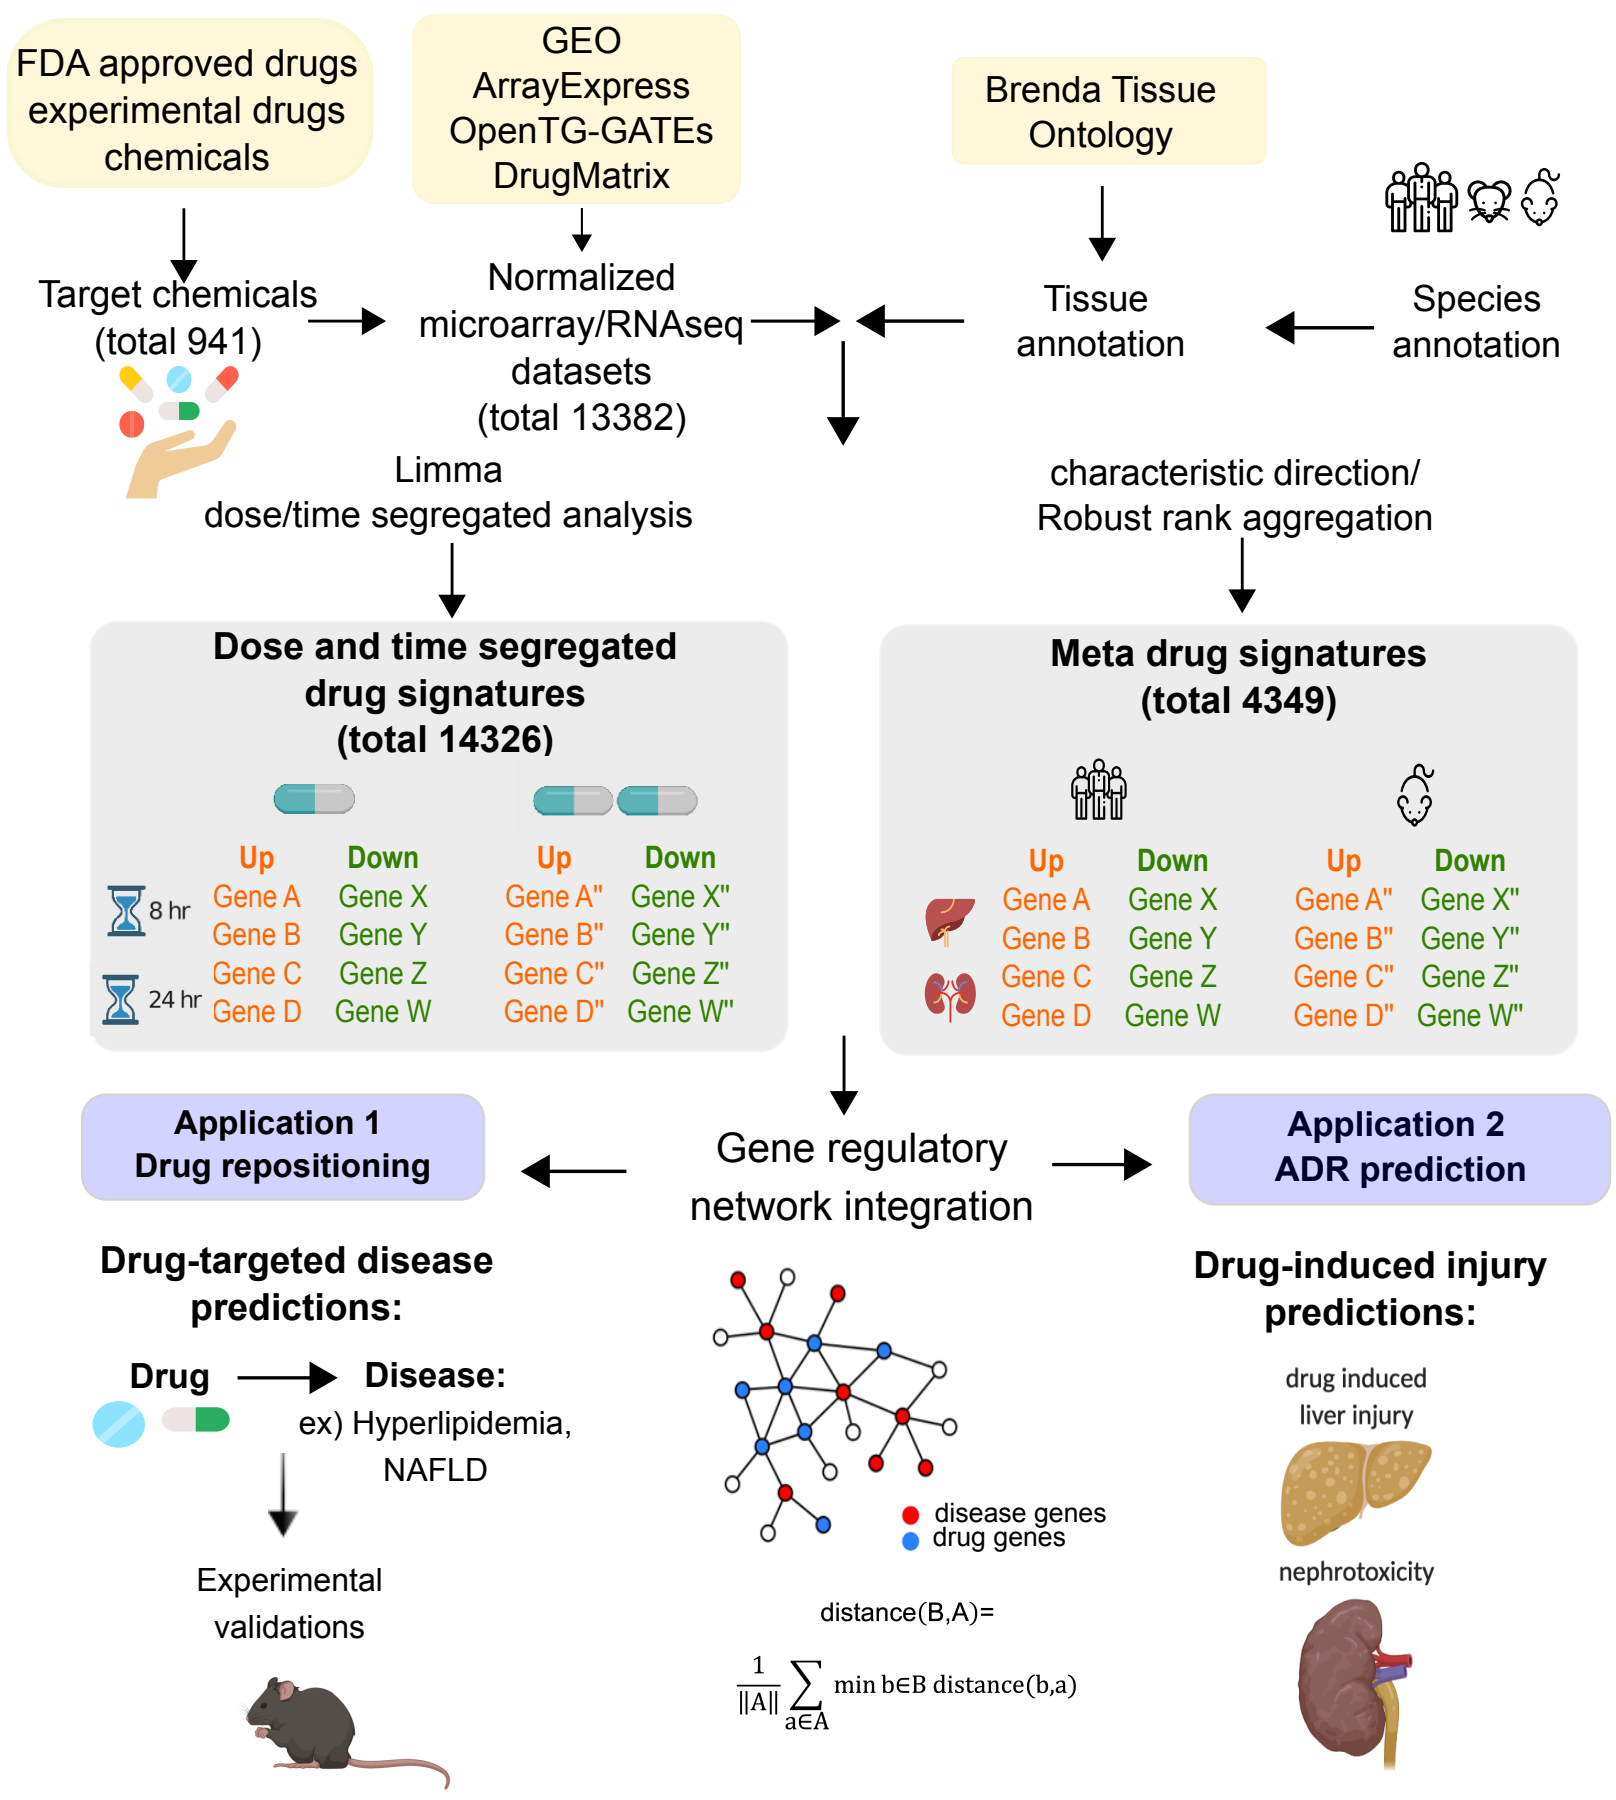



**A**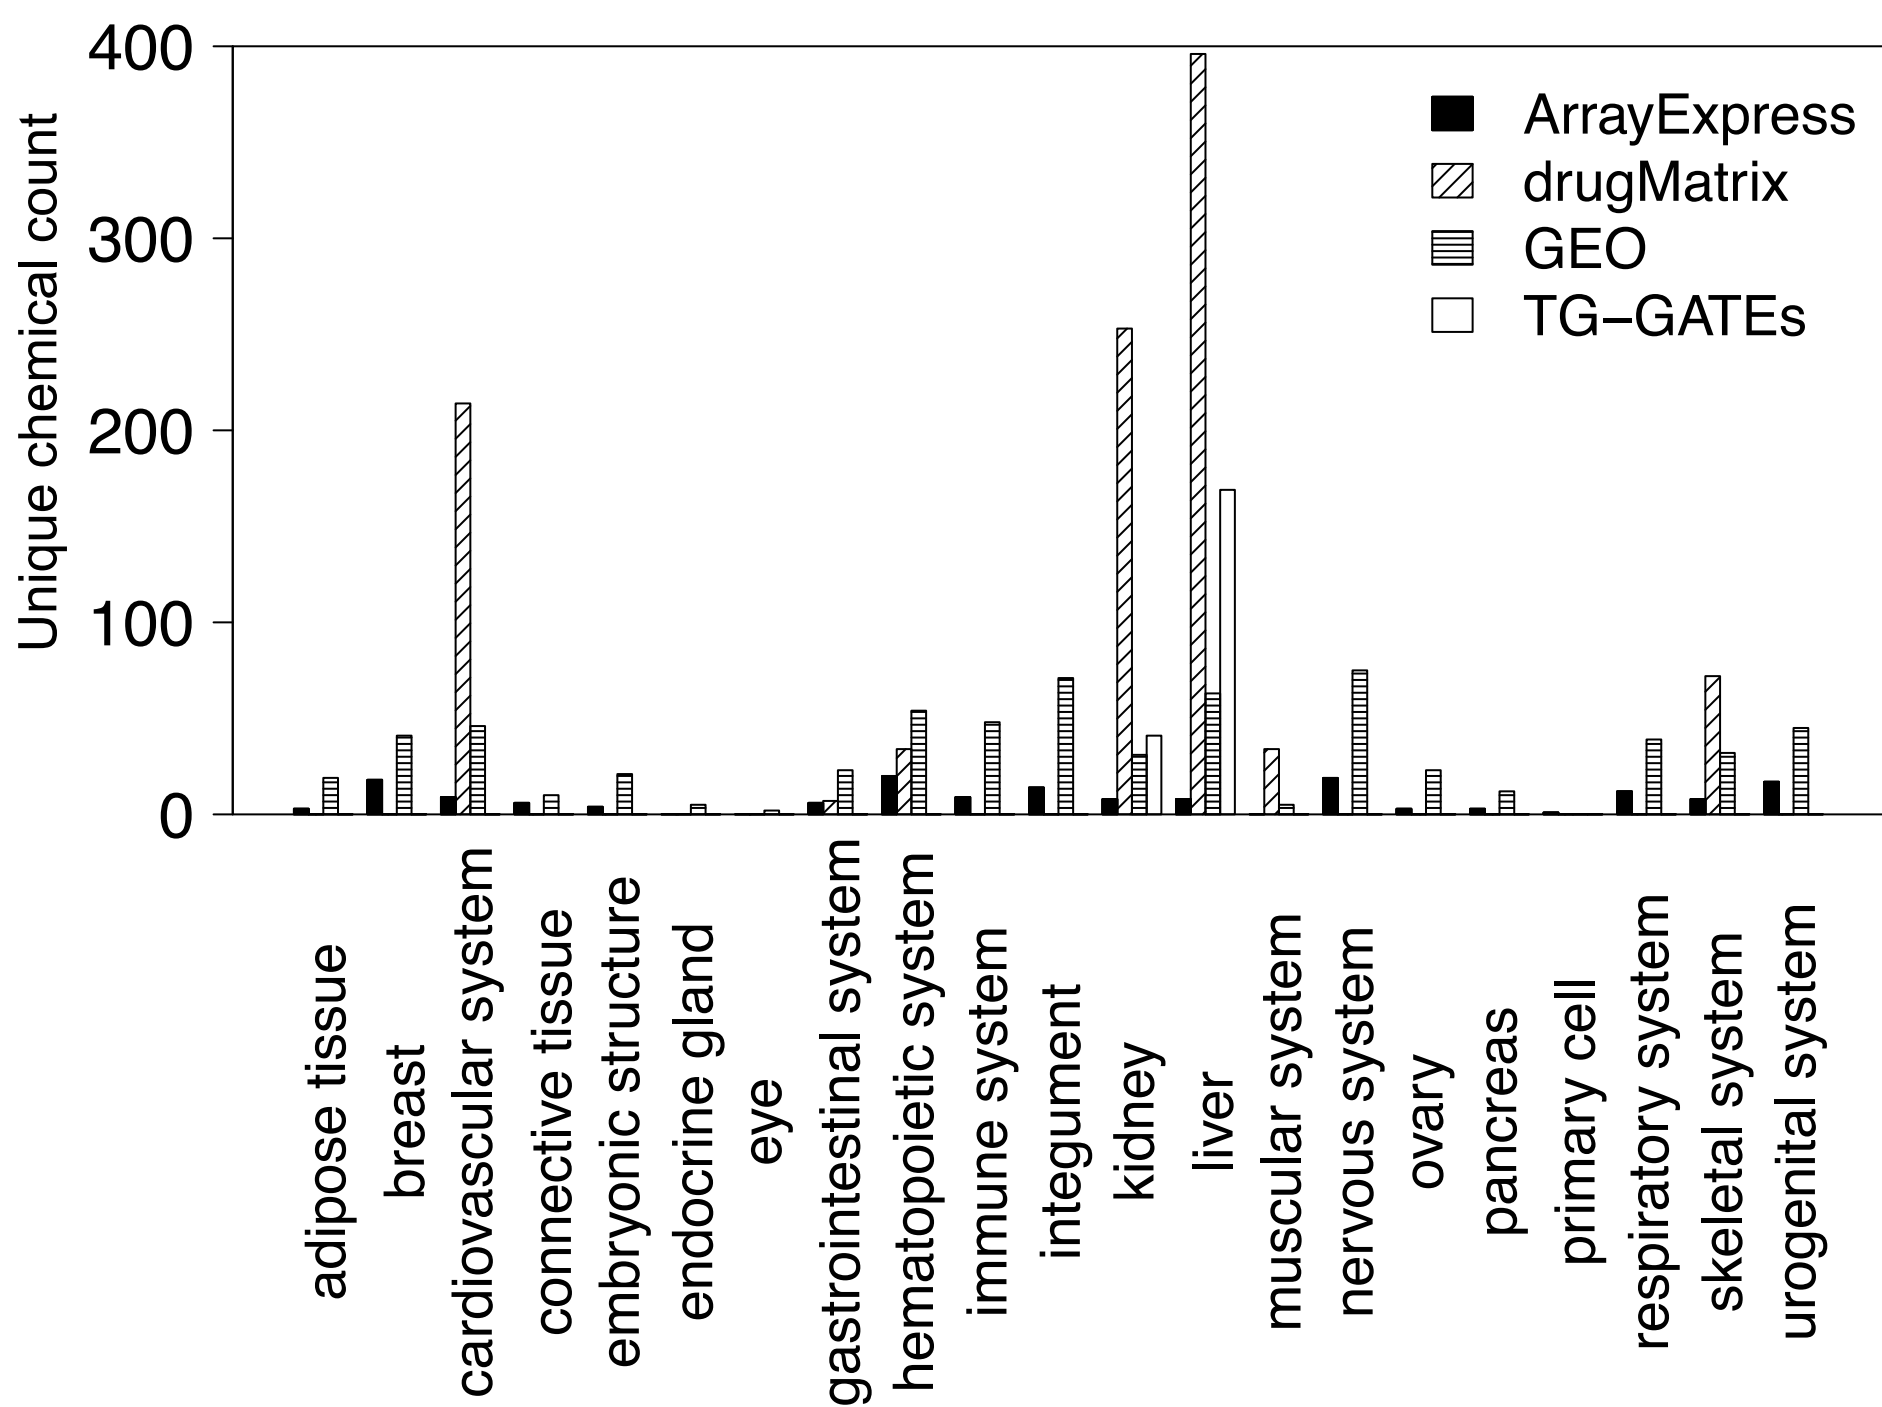**B**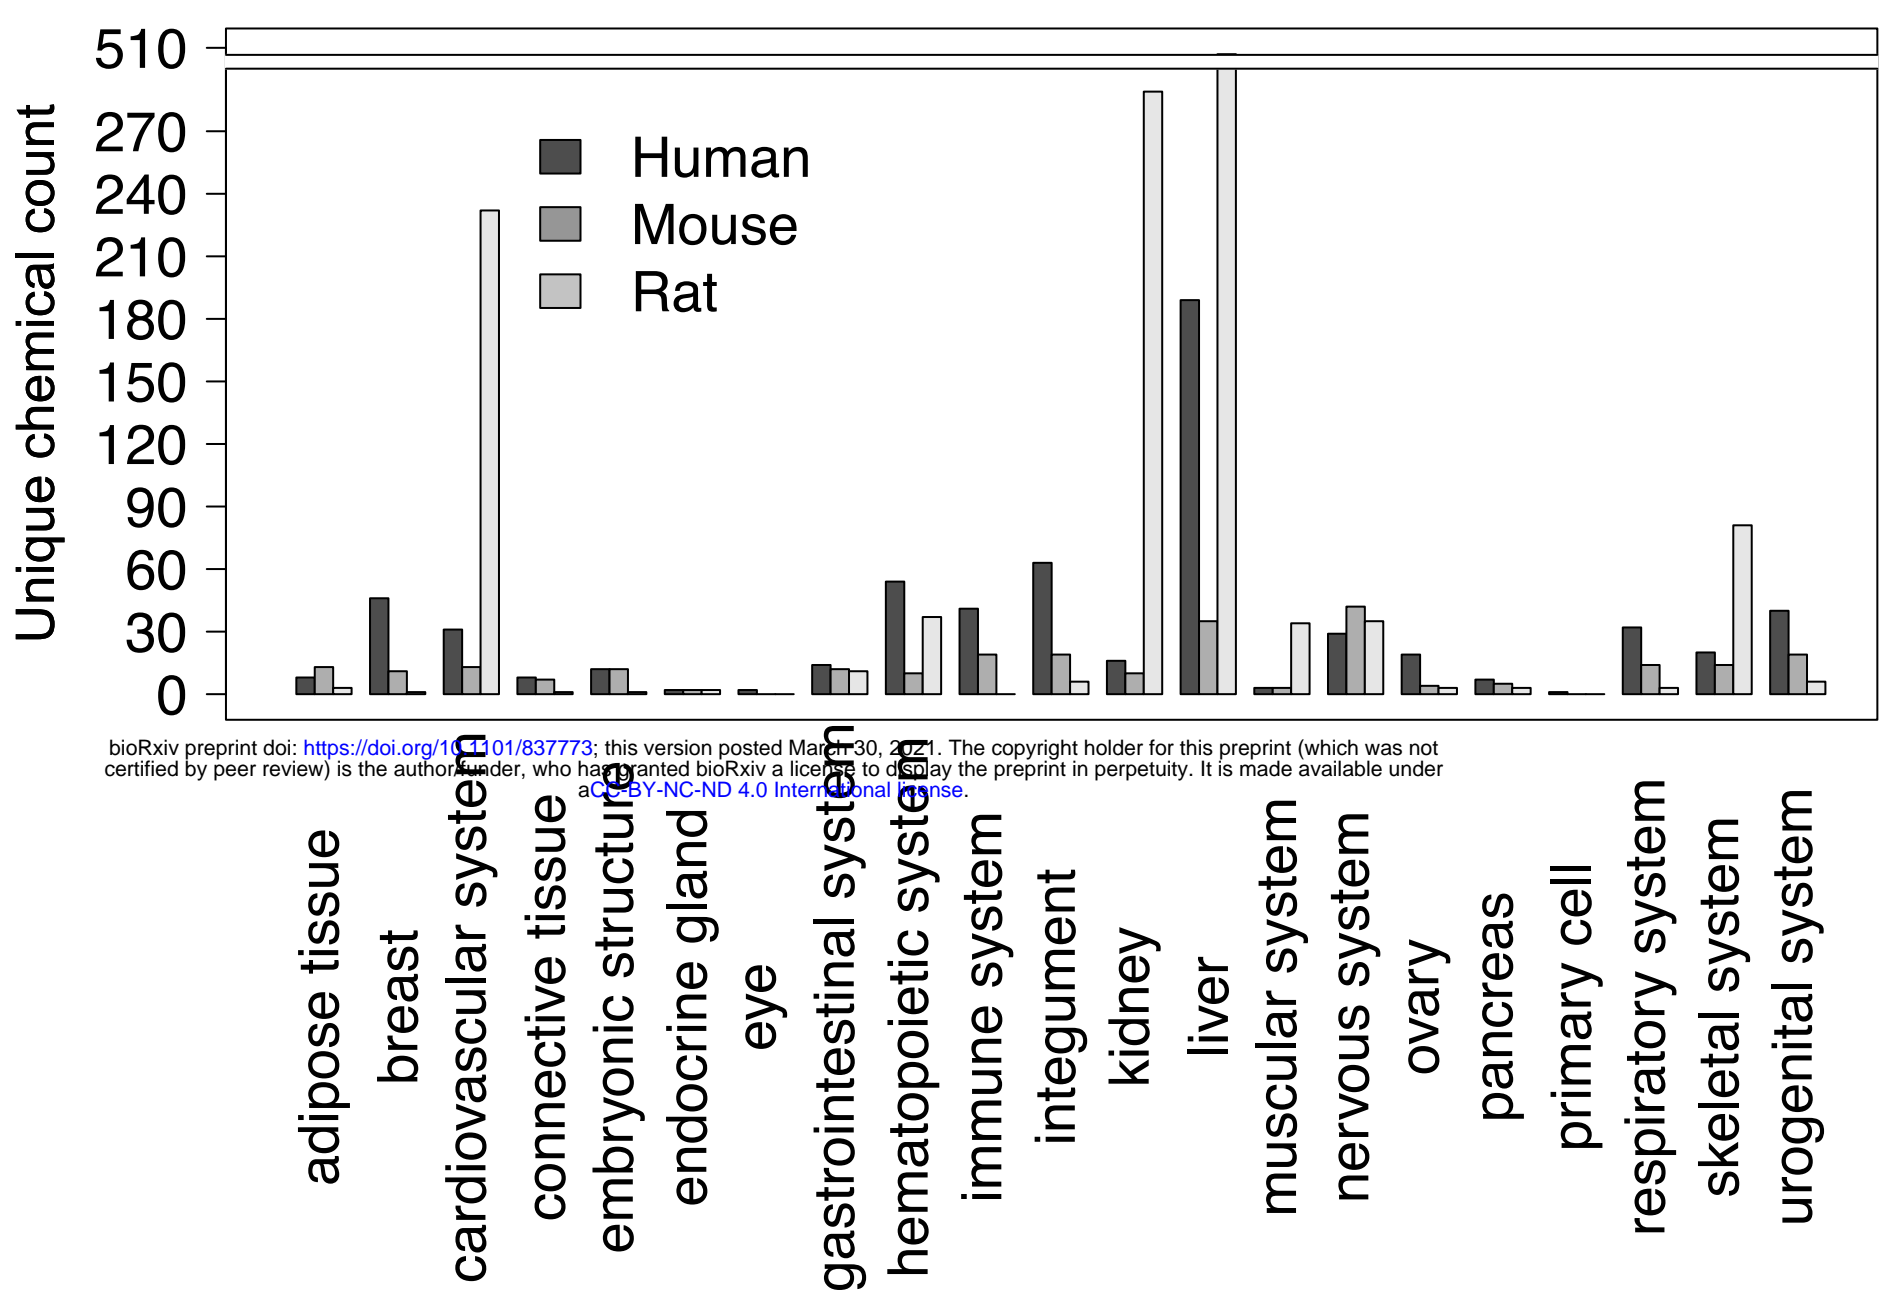

bioRxiv preprint doi: <https://doi.org/10.1101/837773>; this version posted March 30, 2021. The copyright holder for this preprint (which was not certified by peer review) is the author/funder, who has granted bioRxiv a license to display the preprint in perpetuity. It is made available under aCC-BY-NC-ND 4.0 International license.

**C**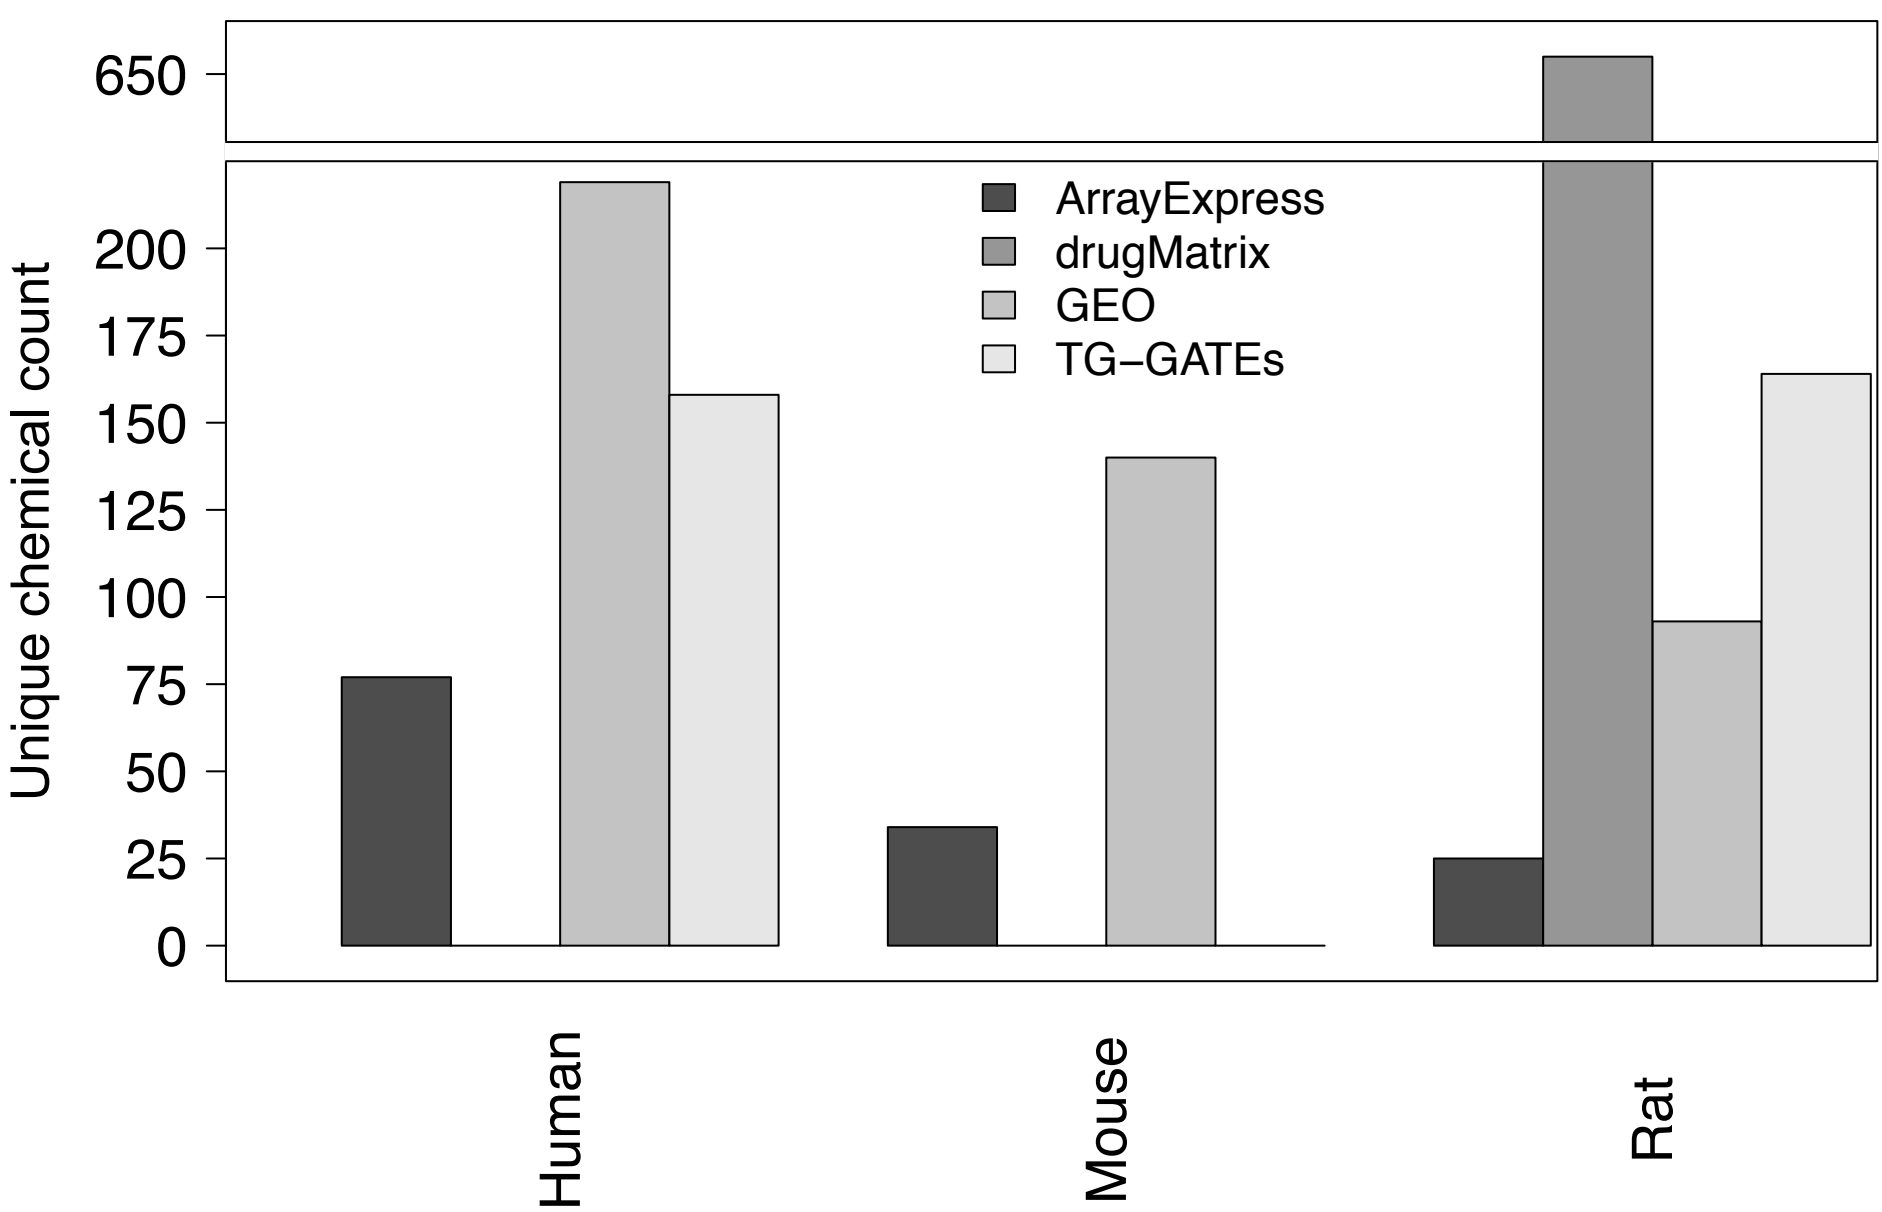

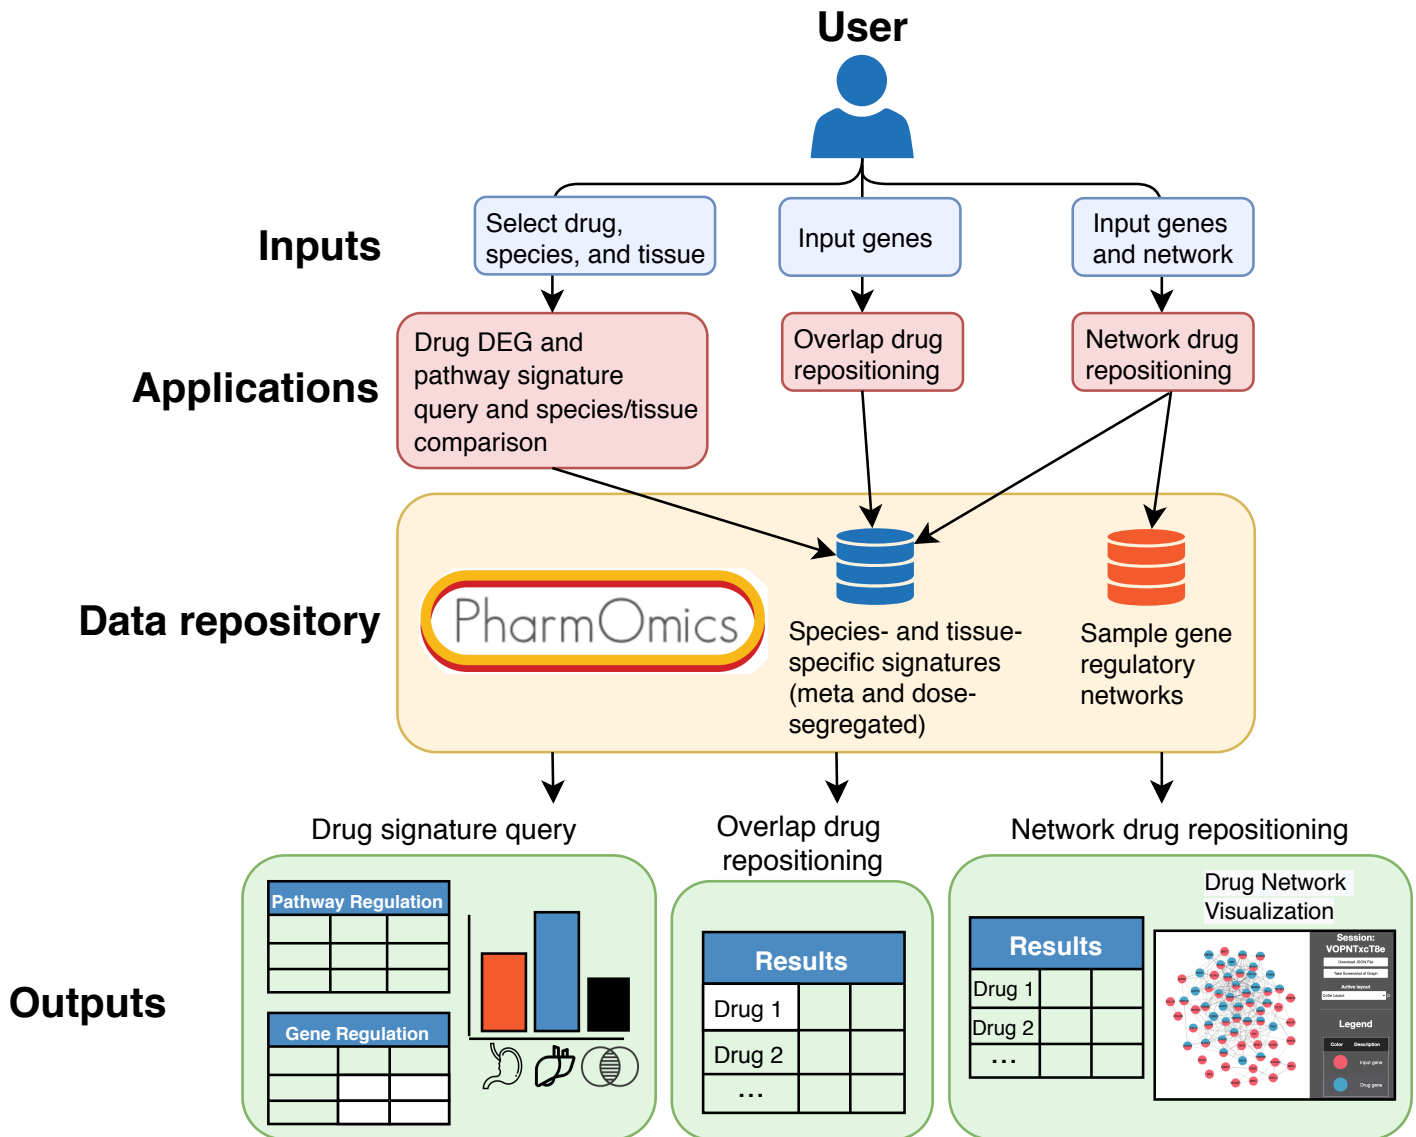

A

## Pharmomics Pipeline

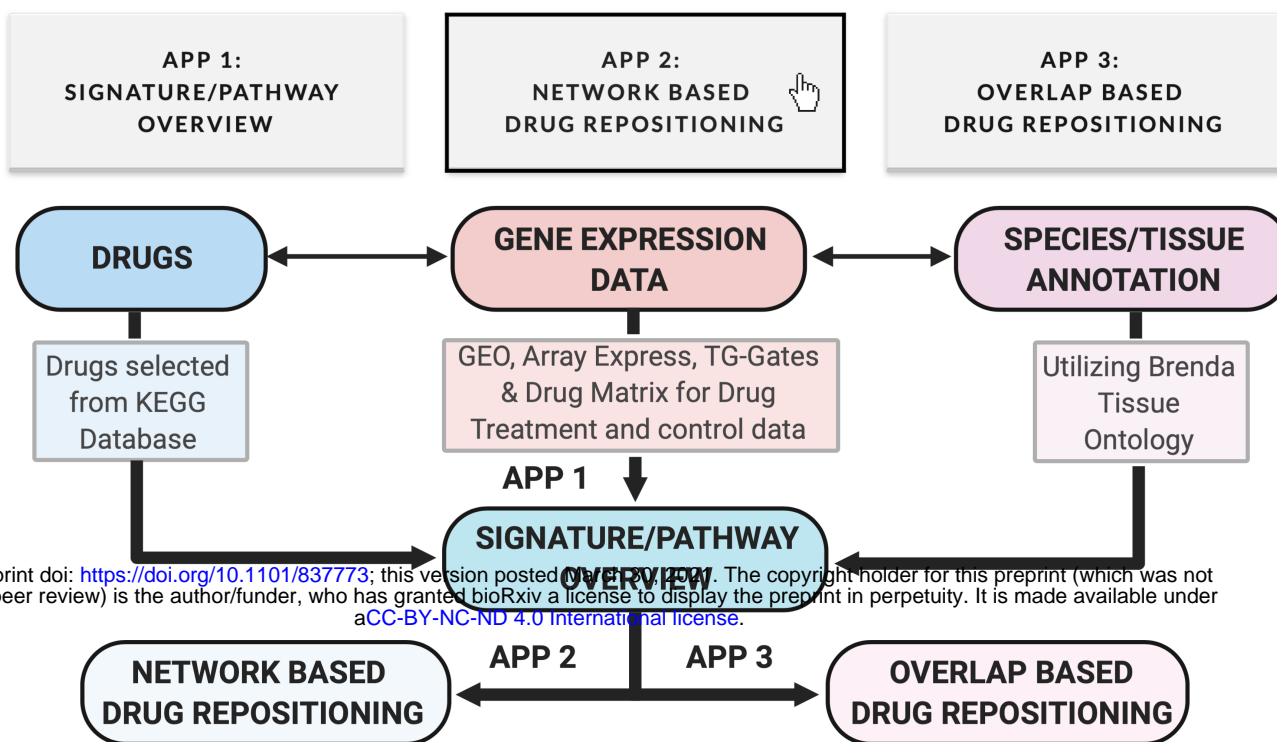

bioRxiv preprint doi: <https://doi.org/10.1101/837773>; this version posted February 1, 2023. The copyright holder for this preprint (which was not certified by peer review) is the author/funder, who has granted bioRxiv a license to display the preprint in perpetuity. It is made available under aCC-BY-NC-ND 4.0 International license.

## APP 2 - NETWORK BASED DRUG REPOSITIONING

Network and Genes Input

This part of the pipeline performs network based drug repositioning based on user input genes

? CLICK FOR TUTORIAL

Drug Repositioning Analysis

Select signature type to query <sup>i</sup>

Dose/time segregated - top 500 genes ...

Select or upload network

Sample Liver Network

Select species

Mouse/Rat

Input genes (max 500), separated by line breaks

FASN  
FDFT1  
SQLE  
SC4MOL  
INSIG1  
LSS

✕ CLEAR FIELDS

+ ADD SAMPLE GENES

Enter your e-mail id for job completion notification (Optional)

✓ myemail@ucla.edu

▶ SUBMIT JOB

B

## APP 2 - NETWORK BASED DRUG REPOSITIONING

Network and Genes Input Review Results

Excel

SEARCH:

| Database            | Drug                      | Species           | Tissue | Study          | Time | Dose       | Jaccard Score | Z score | Z score rank | P value   | Visualization Link |
|---------------------|---------------------------|-------------------|--------|----------------|------|------------|---------------|---------|--------------|-----------|--------------------|
| drugMatrix_Codelink | Fluvastatin               | Rattus norvegicus | liver  | In Vivo        | 5d   | 5 mg/kg    | 0.141         | -7.373  | 1.000        | 8.362E-14 | DISPLAY NETWORK    |
| drugMatrix_Codelink | Procarbazine              | Rattus norvegicus | liver  | In Vivo        | 5d   | 27 mg/kg   | 0.019         | -7.254  | 1.000        | 2.017E-13 | DISPLAY NETWORK    |
| drugMatrix_Affy     | Oxymetholone              | Rattus norvegicus | liver  | In Vivo        | 1d   | 1170 mg/kg | 0.135         | -6.147  | 1.000        | 3.937E-10 | DISPLAY NETWORK    |
| drugMatrix_Codelink | Indomethacin              | Rattus norvegicus | liver  | In Vivo        | 6hr  | 4.5 mg/kg  | 0.019         | -5.559  | 1.000        | 1.360E-08 | DISPLAY NETWORK    |
| TG-GATEs            | Chlorpropamide            | Rattus norvegicus | liver  | In Vivo Single | 6hr  | 300 mg/kg  | 0.019         | -5.551  | 1.000        | 1.421E-08 | DISPLAY NETWORK    |
| drugMatrix_Codelink | Emetine                   | Rattus norvegicus | kidney | In Vivo        | 5d   | 1 mg/kg    | 0.019         | -5.543  | 0.999        | 1.486E-08 | DISPLAY NETWORK    |
| TG-GATEs            | Puromycin aminonucleoside | Rattus norvegicus | kidney | In Vivo Repeat | 4d   | 4 mg/kg    | 0.019         | -5.380  | 0.999        | 3.731E-08 | DISPLAY NETWORK    |
| drugMatrix_Codelink | 1-naphthyl isothiocyanate | Rattus norvegicus | liver  | In Vivo        | 1d   | 15 mg/kg   | 0.018         | -5.150  | 0.999        | 1.305E-07 | DISPLAY NETWORK    |
| drugMatrix_Affy     | Gemfibrozil               | Rattus norvegicus | liver  | In Vivo        | 7d   | 700 mg/kg  | 0.079         | -4.944  | 0.999        | 3.829E-07 | DISPLAY NETWORK    |
| drugMatrix_Affy     | Lovastatin                | Rattus norvegicus | liver  | In Vivo        | 1d   | 450 mg/kg  | 0.070         | -4.907  | 0.999        | 4.623E-07 | DISPLAY NETWORK    |

Showing 1 to 10 of 11,700 entries

Previous 1 2 3 4 5 ... 1170 Next

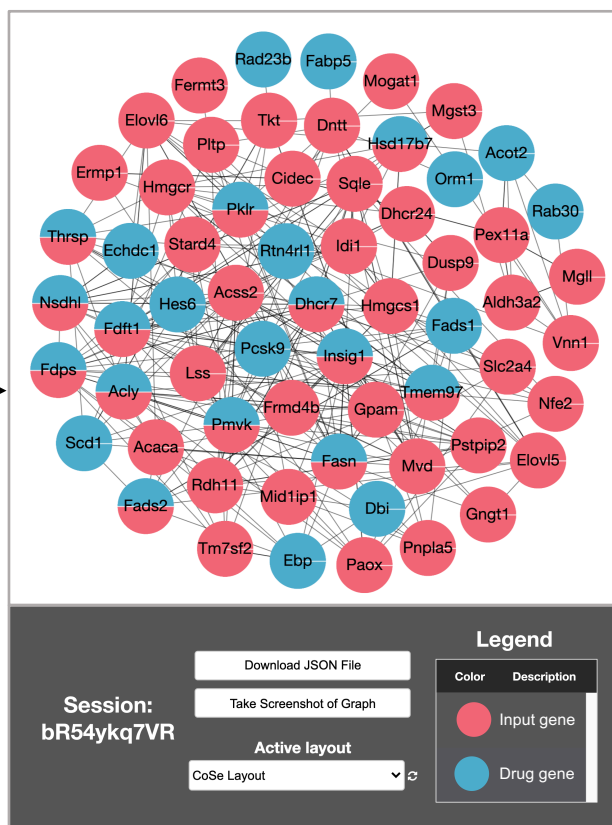



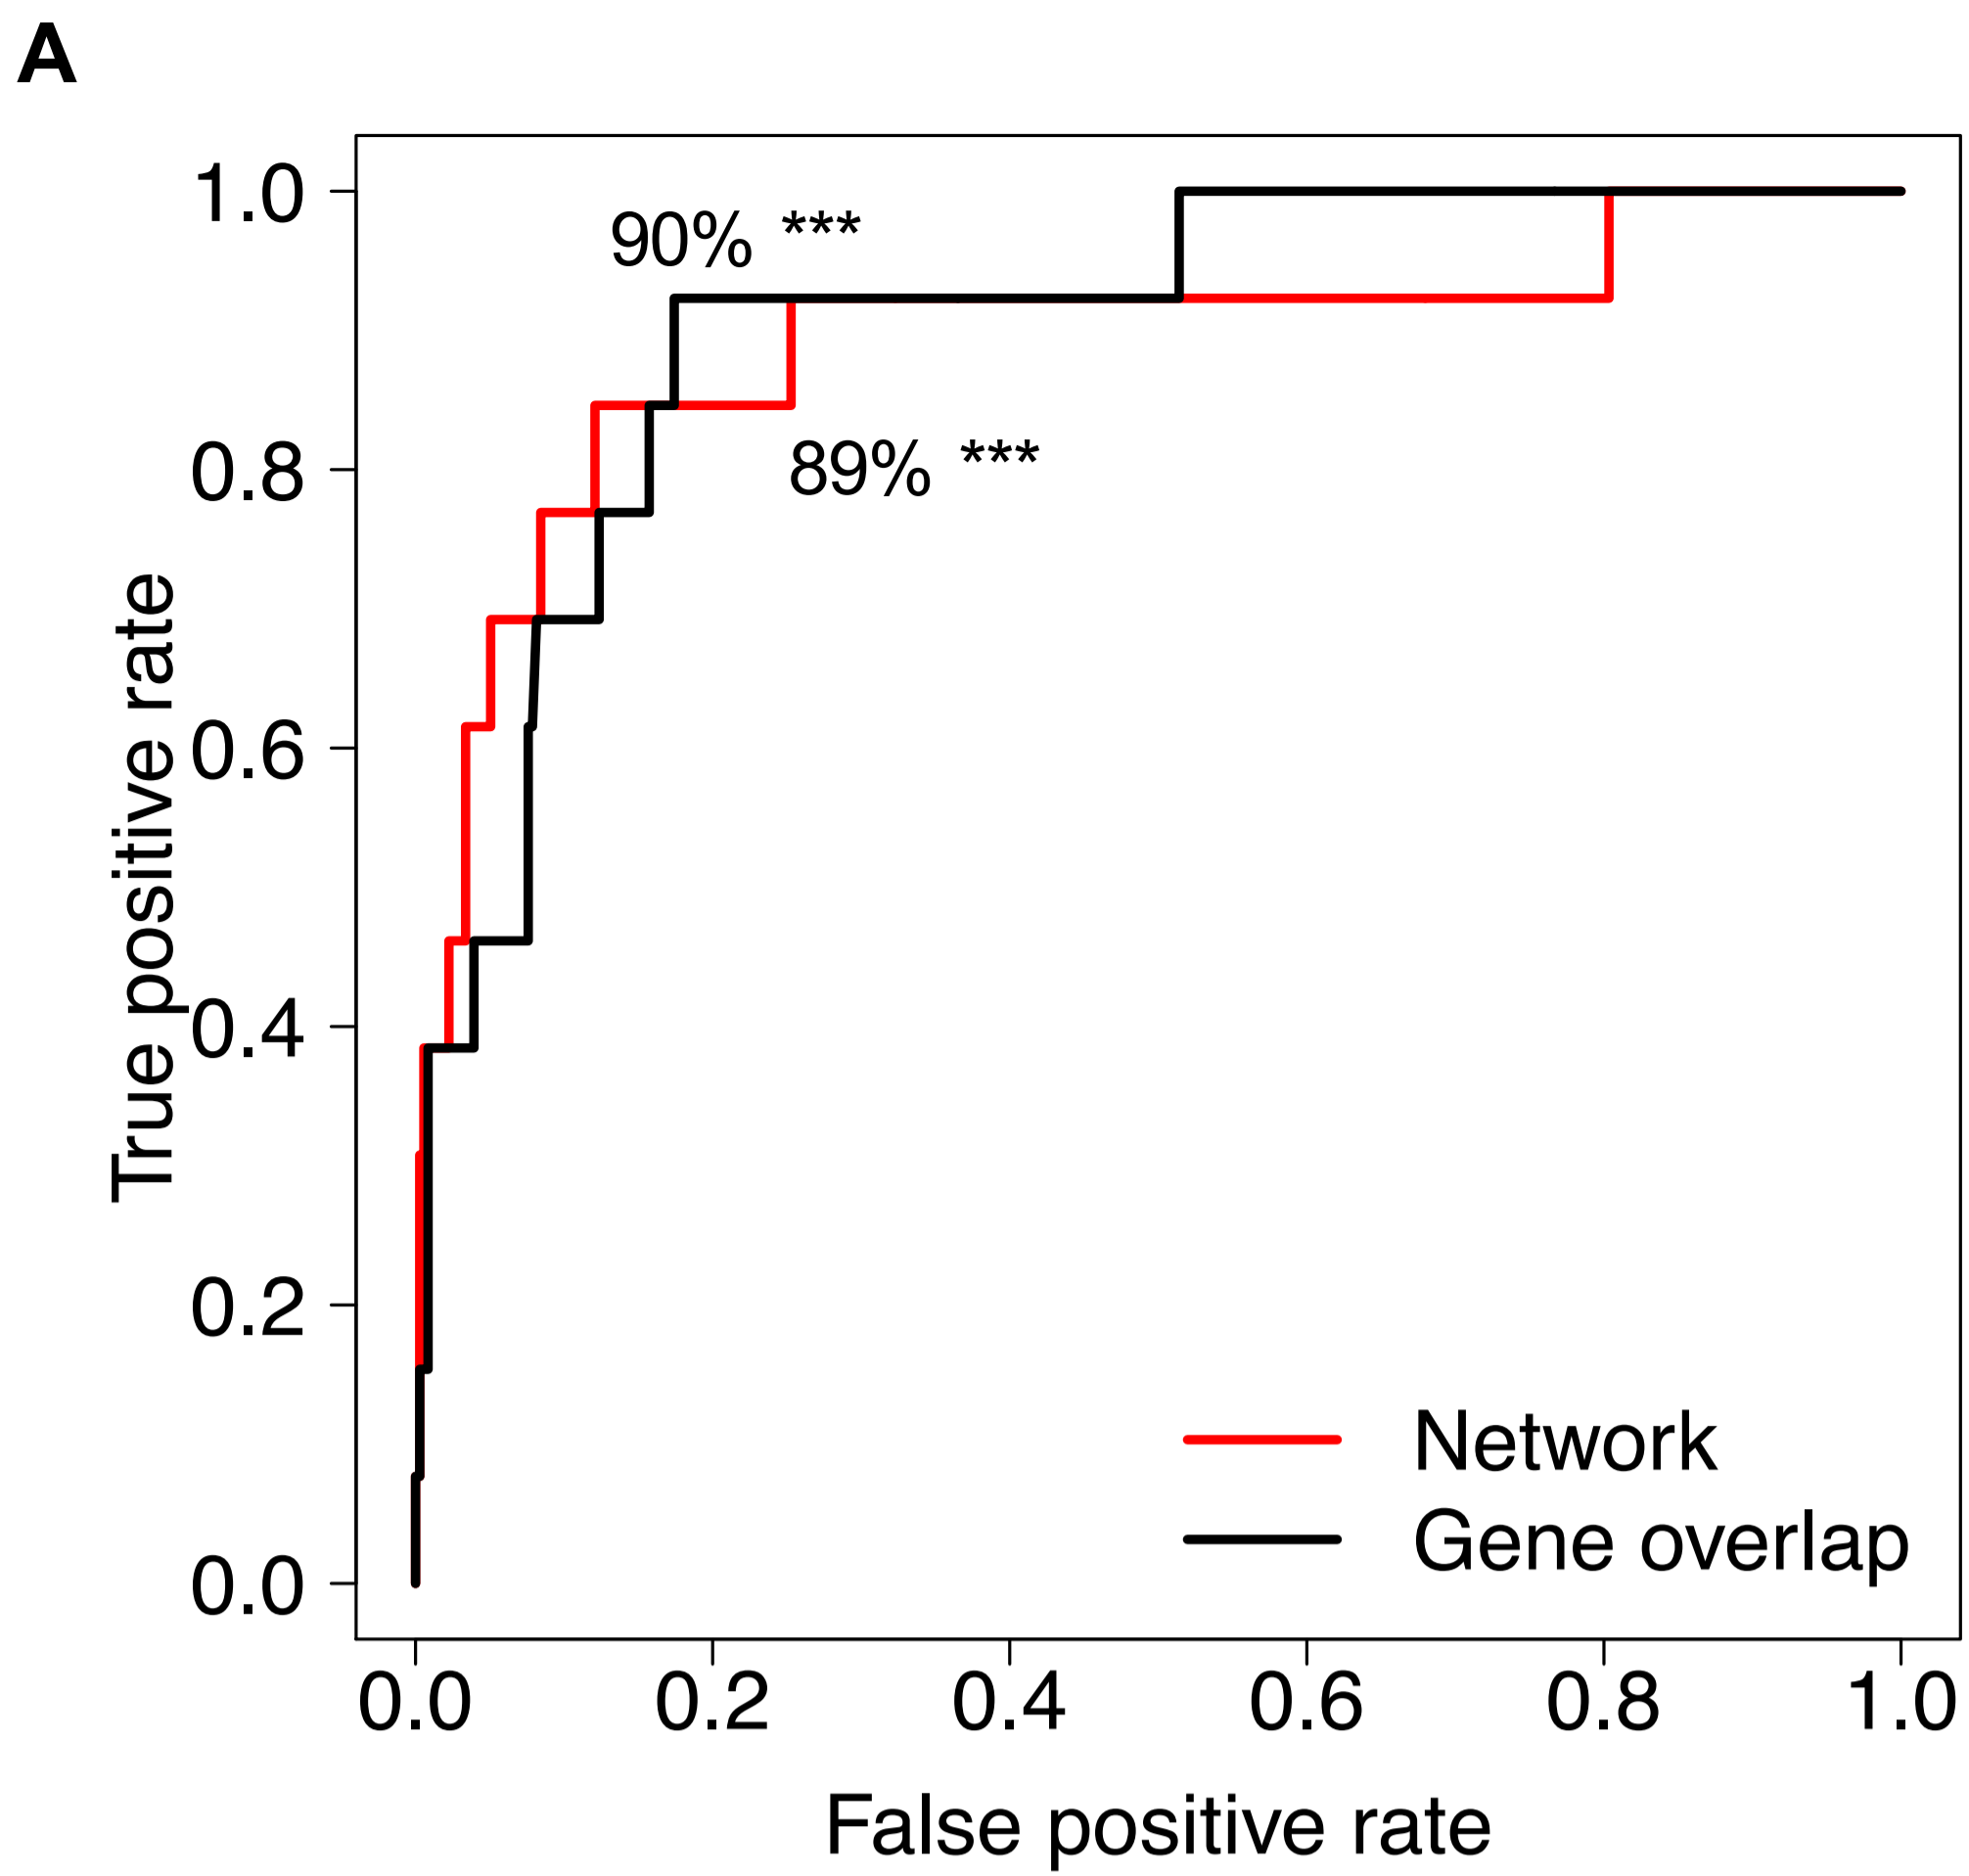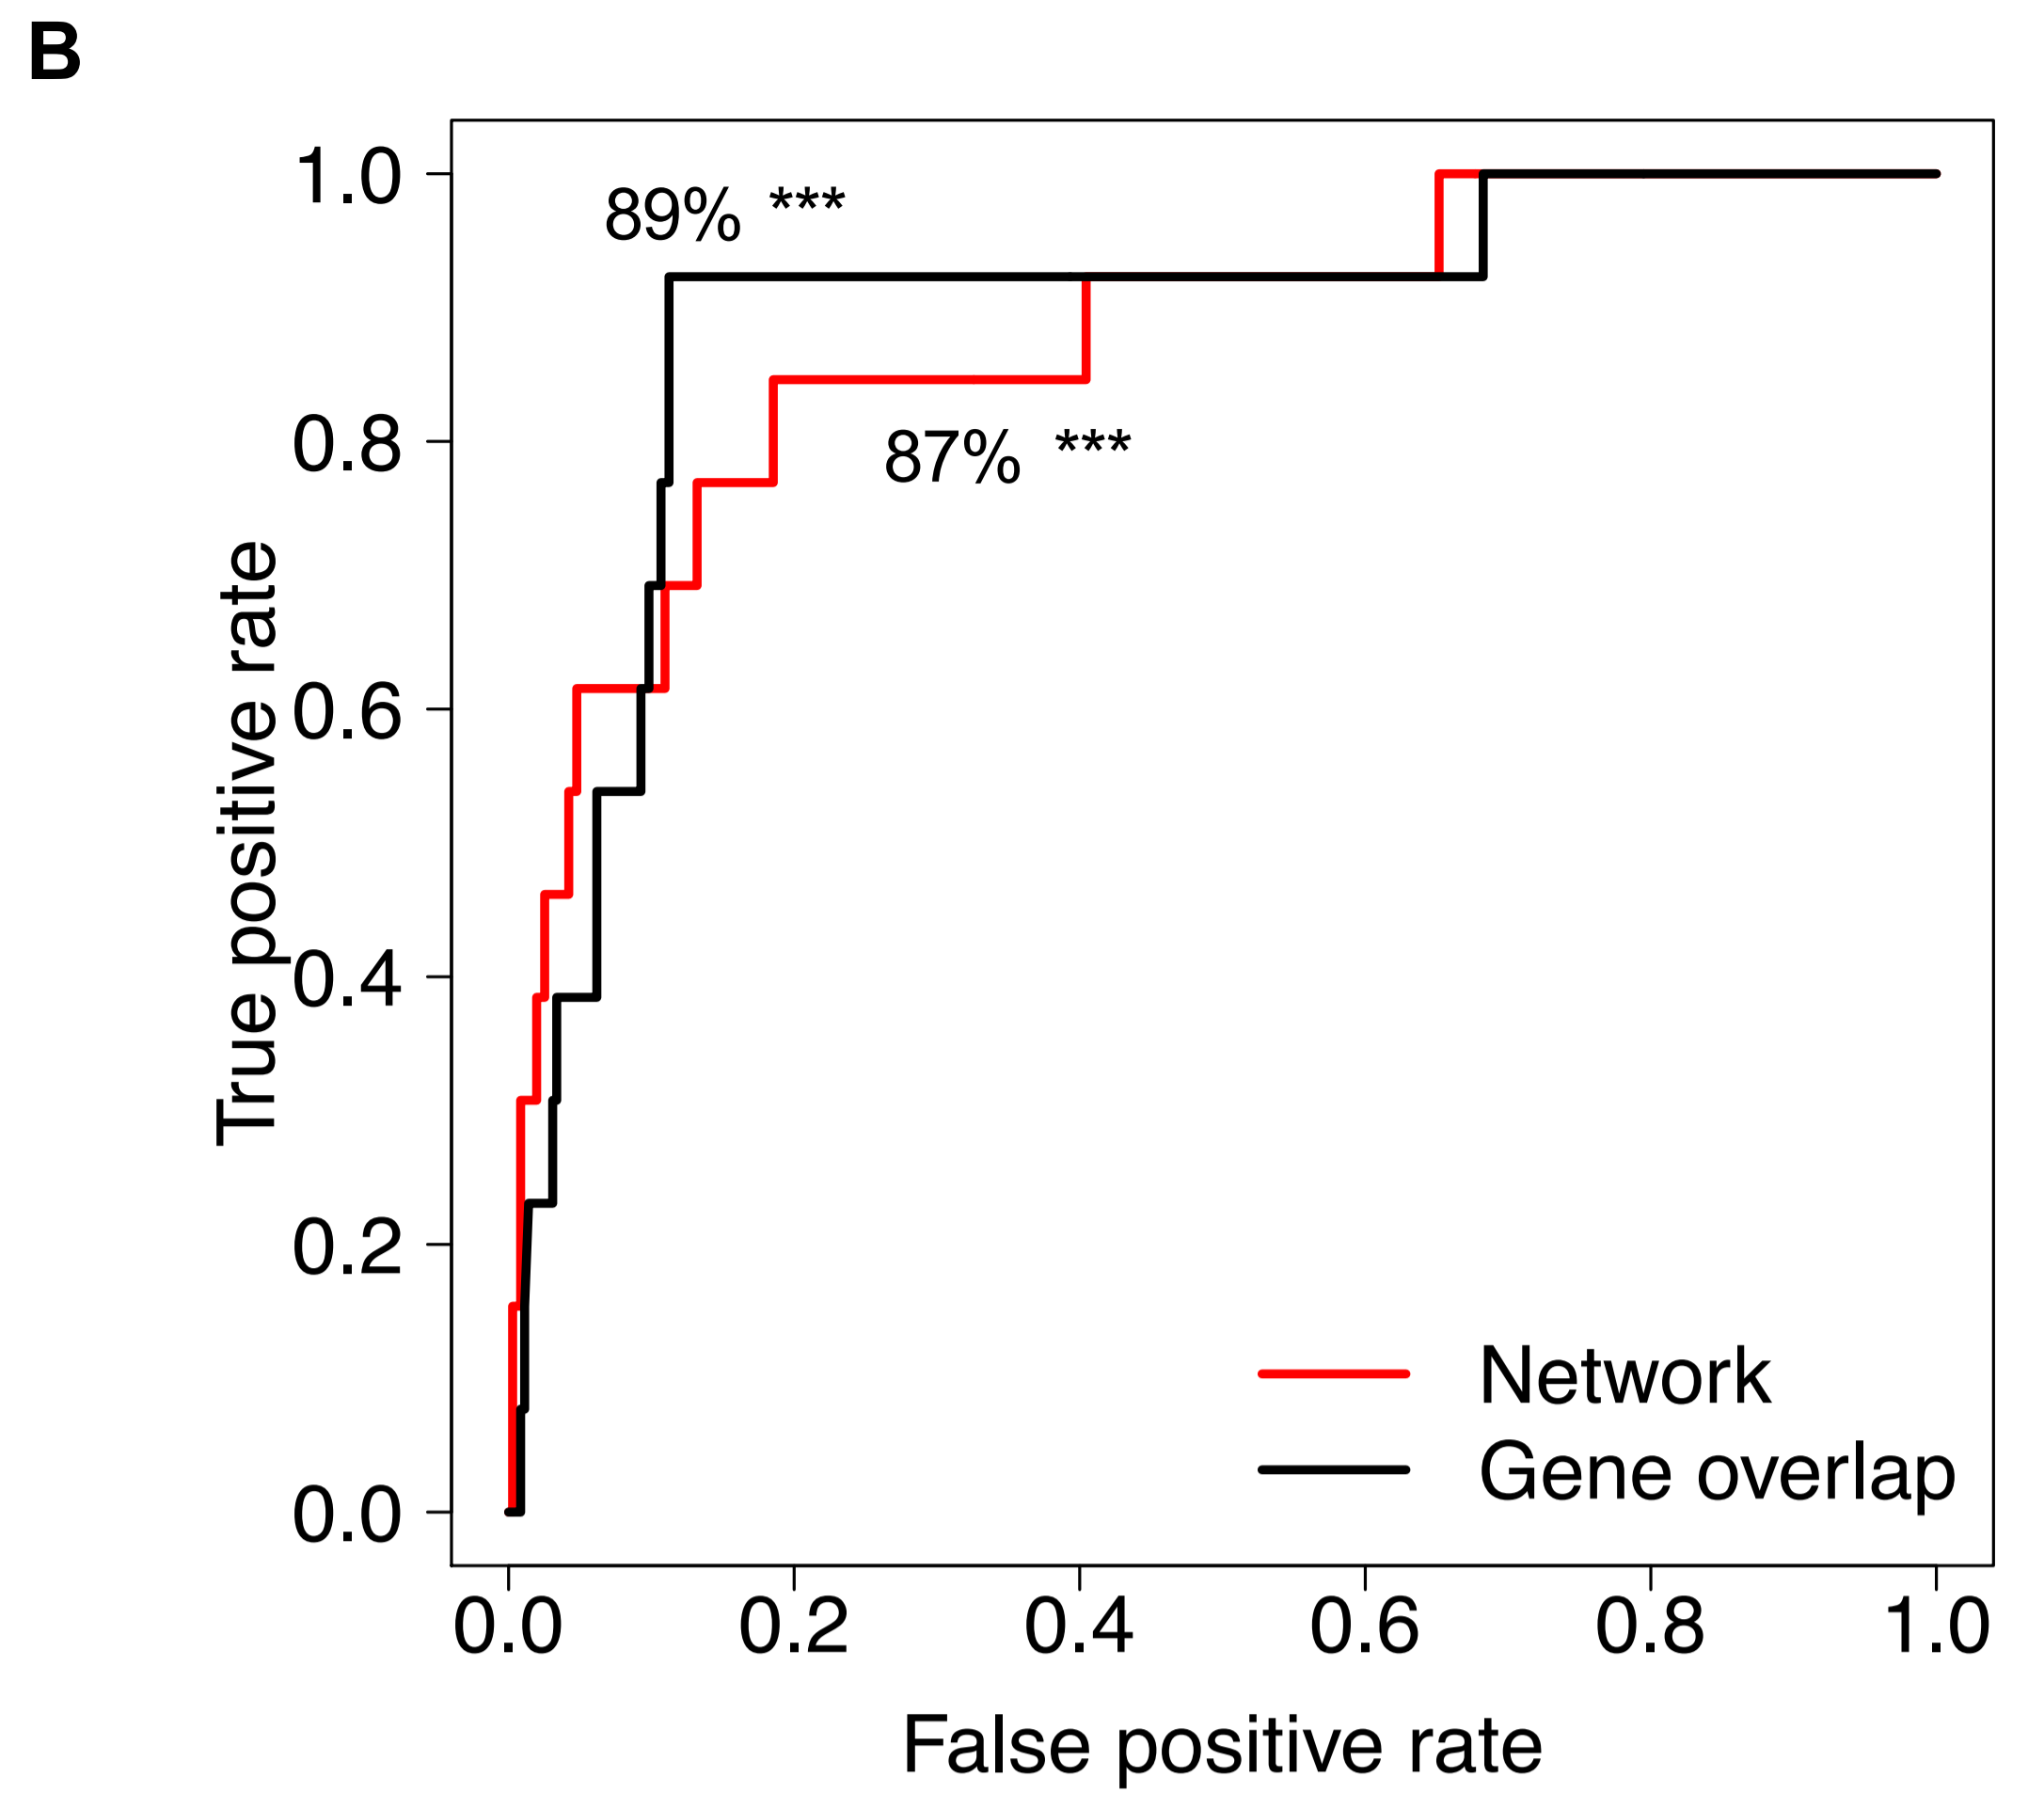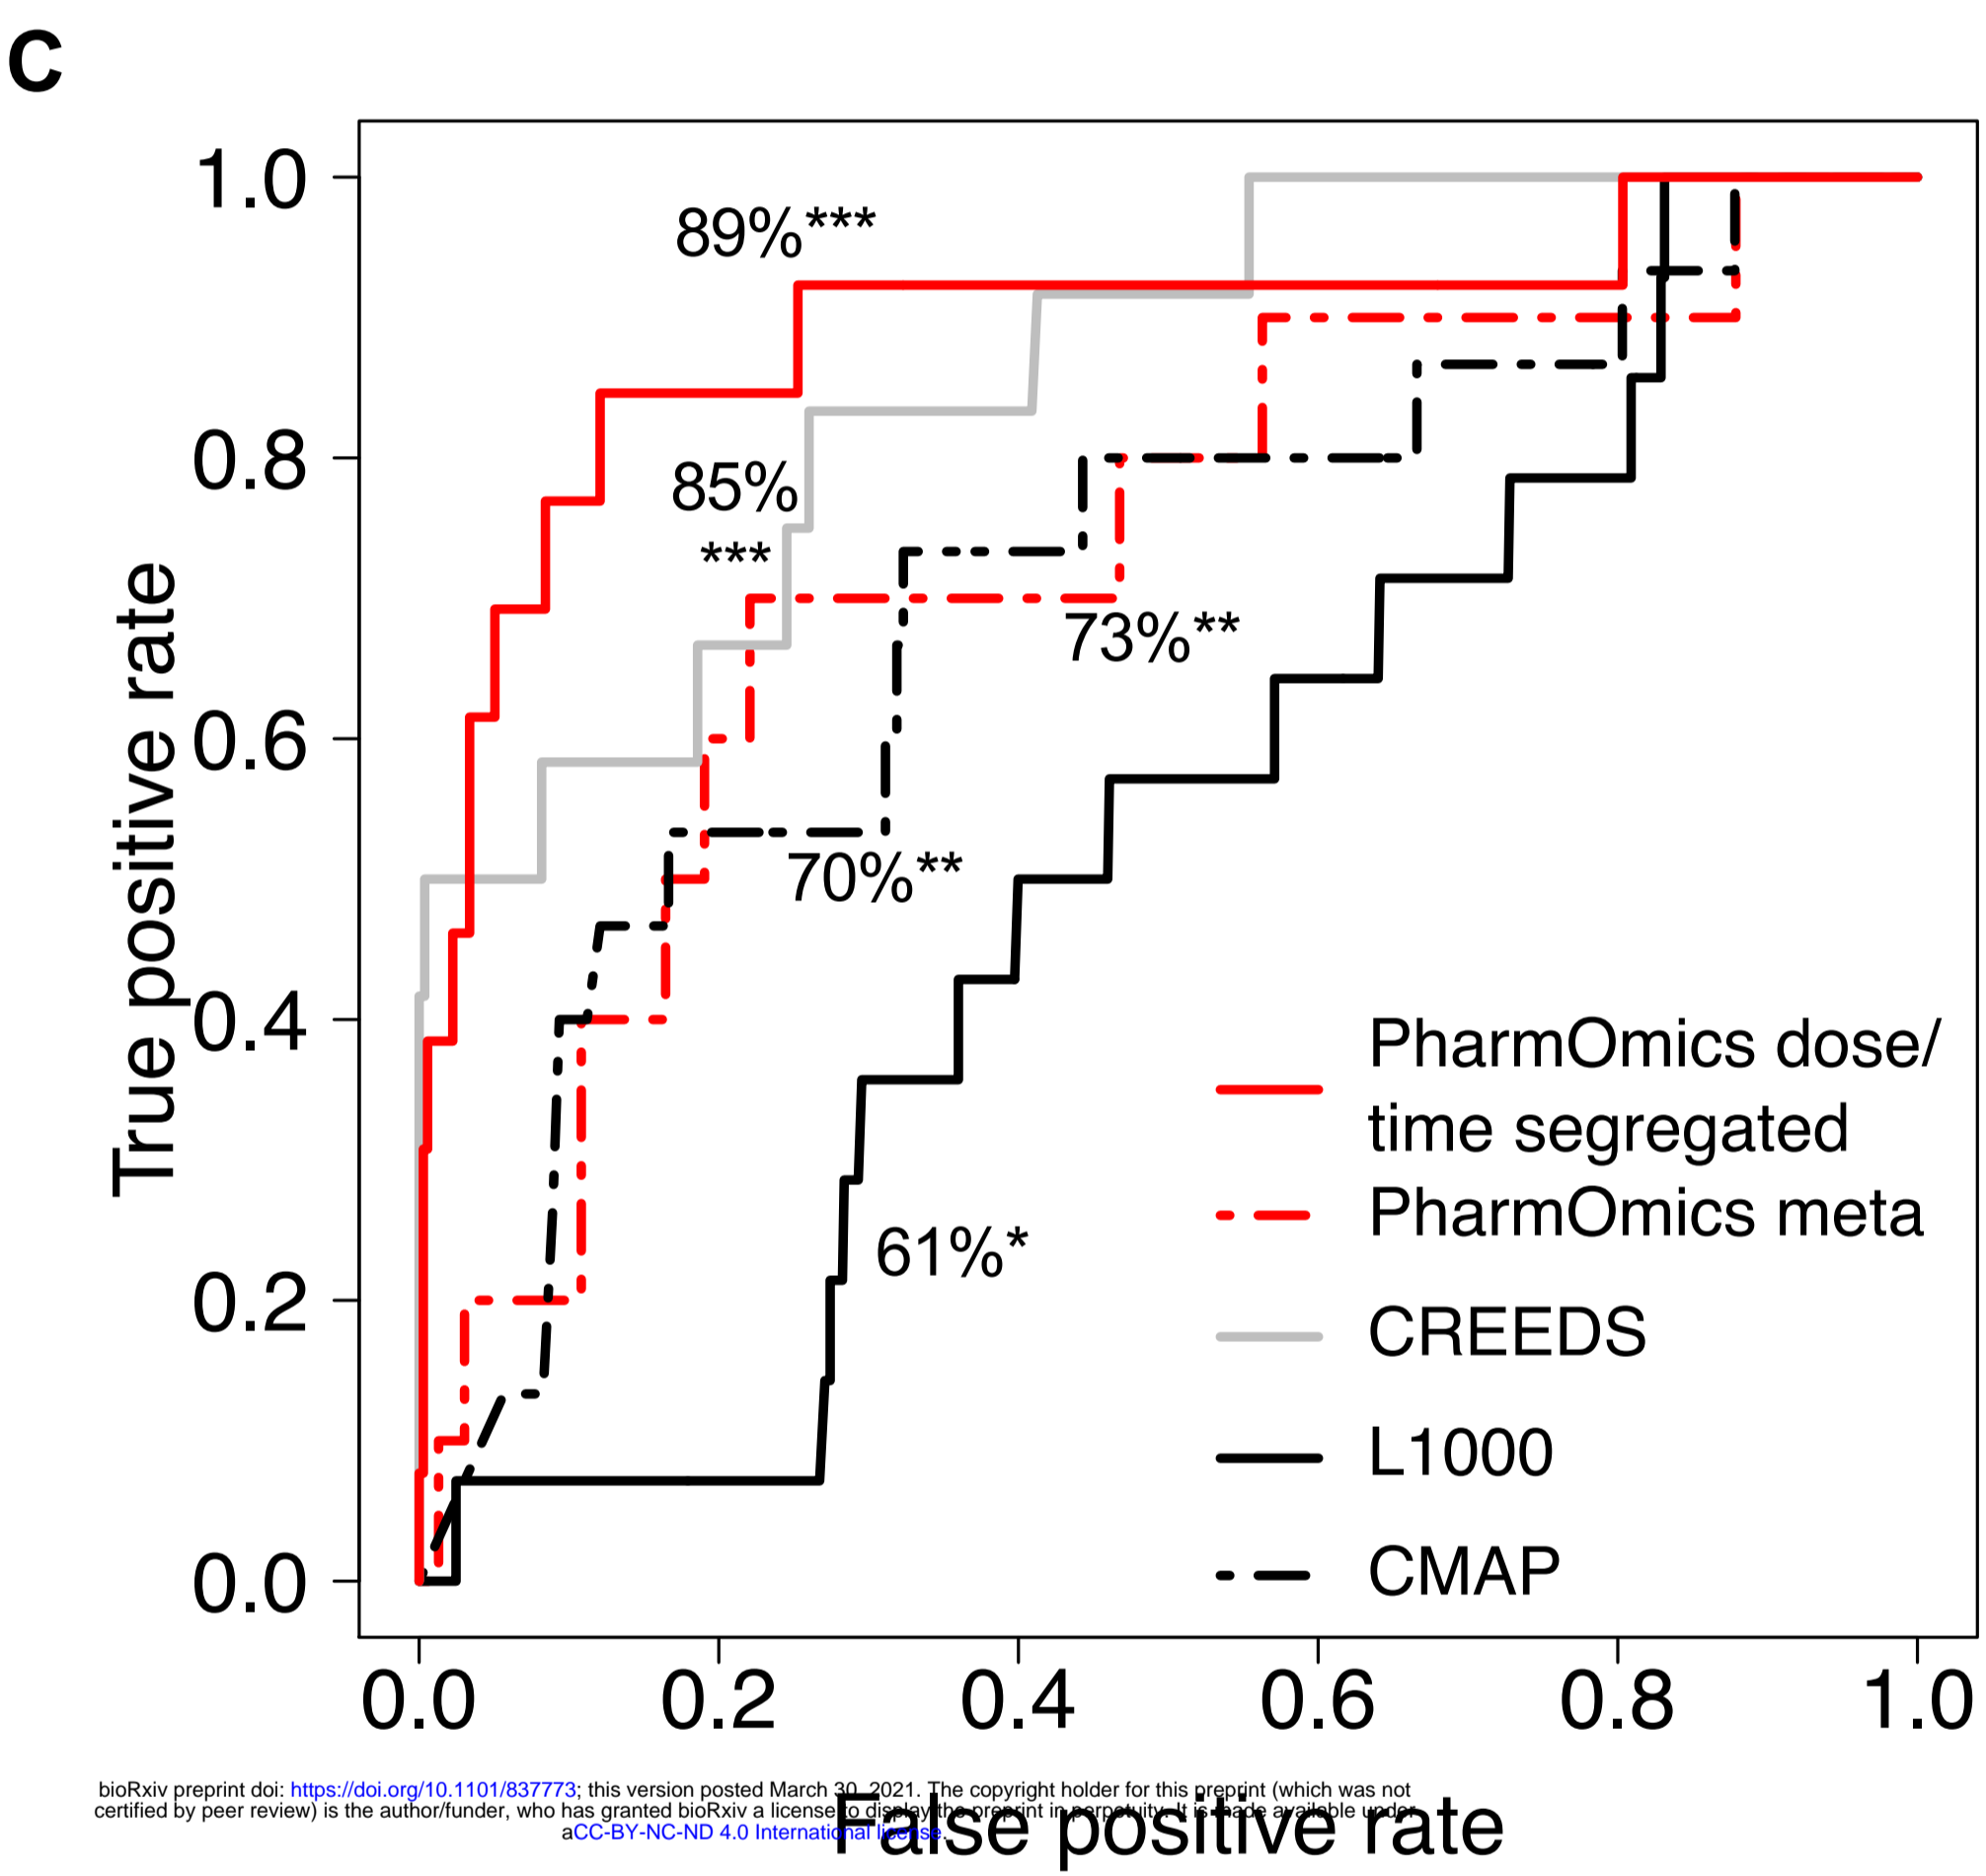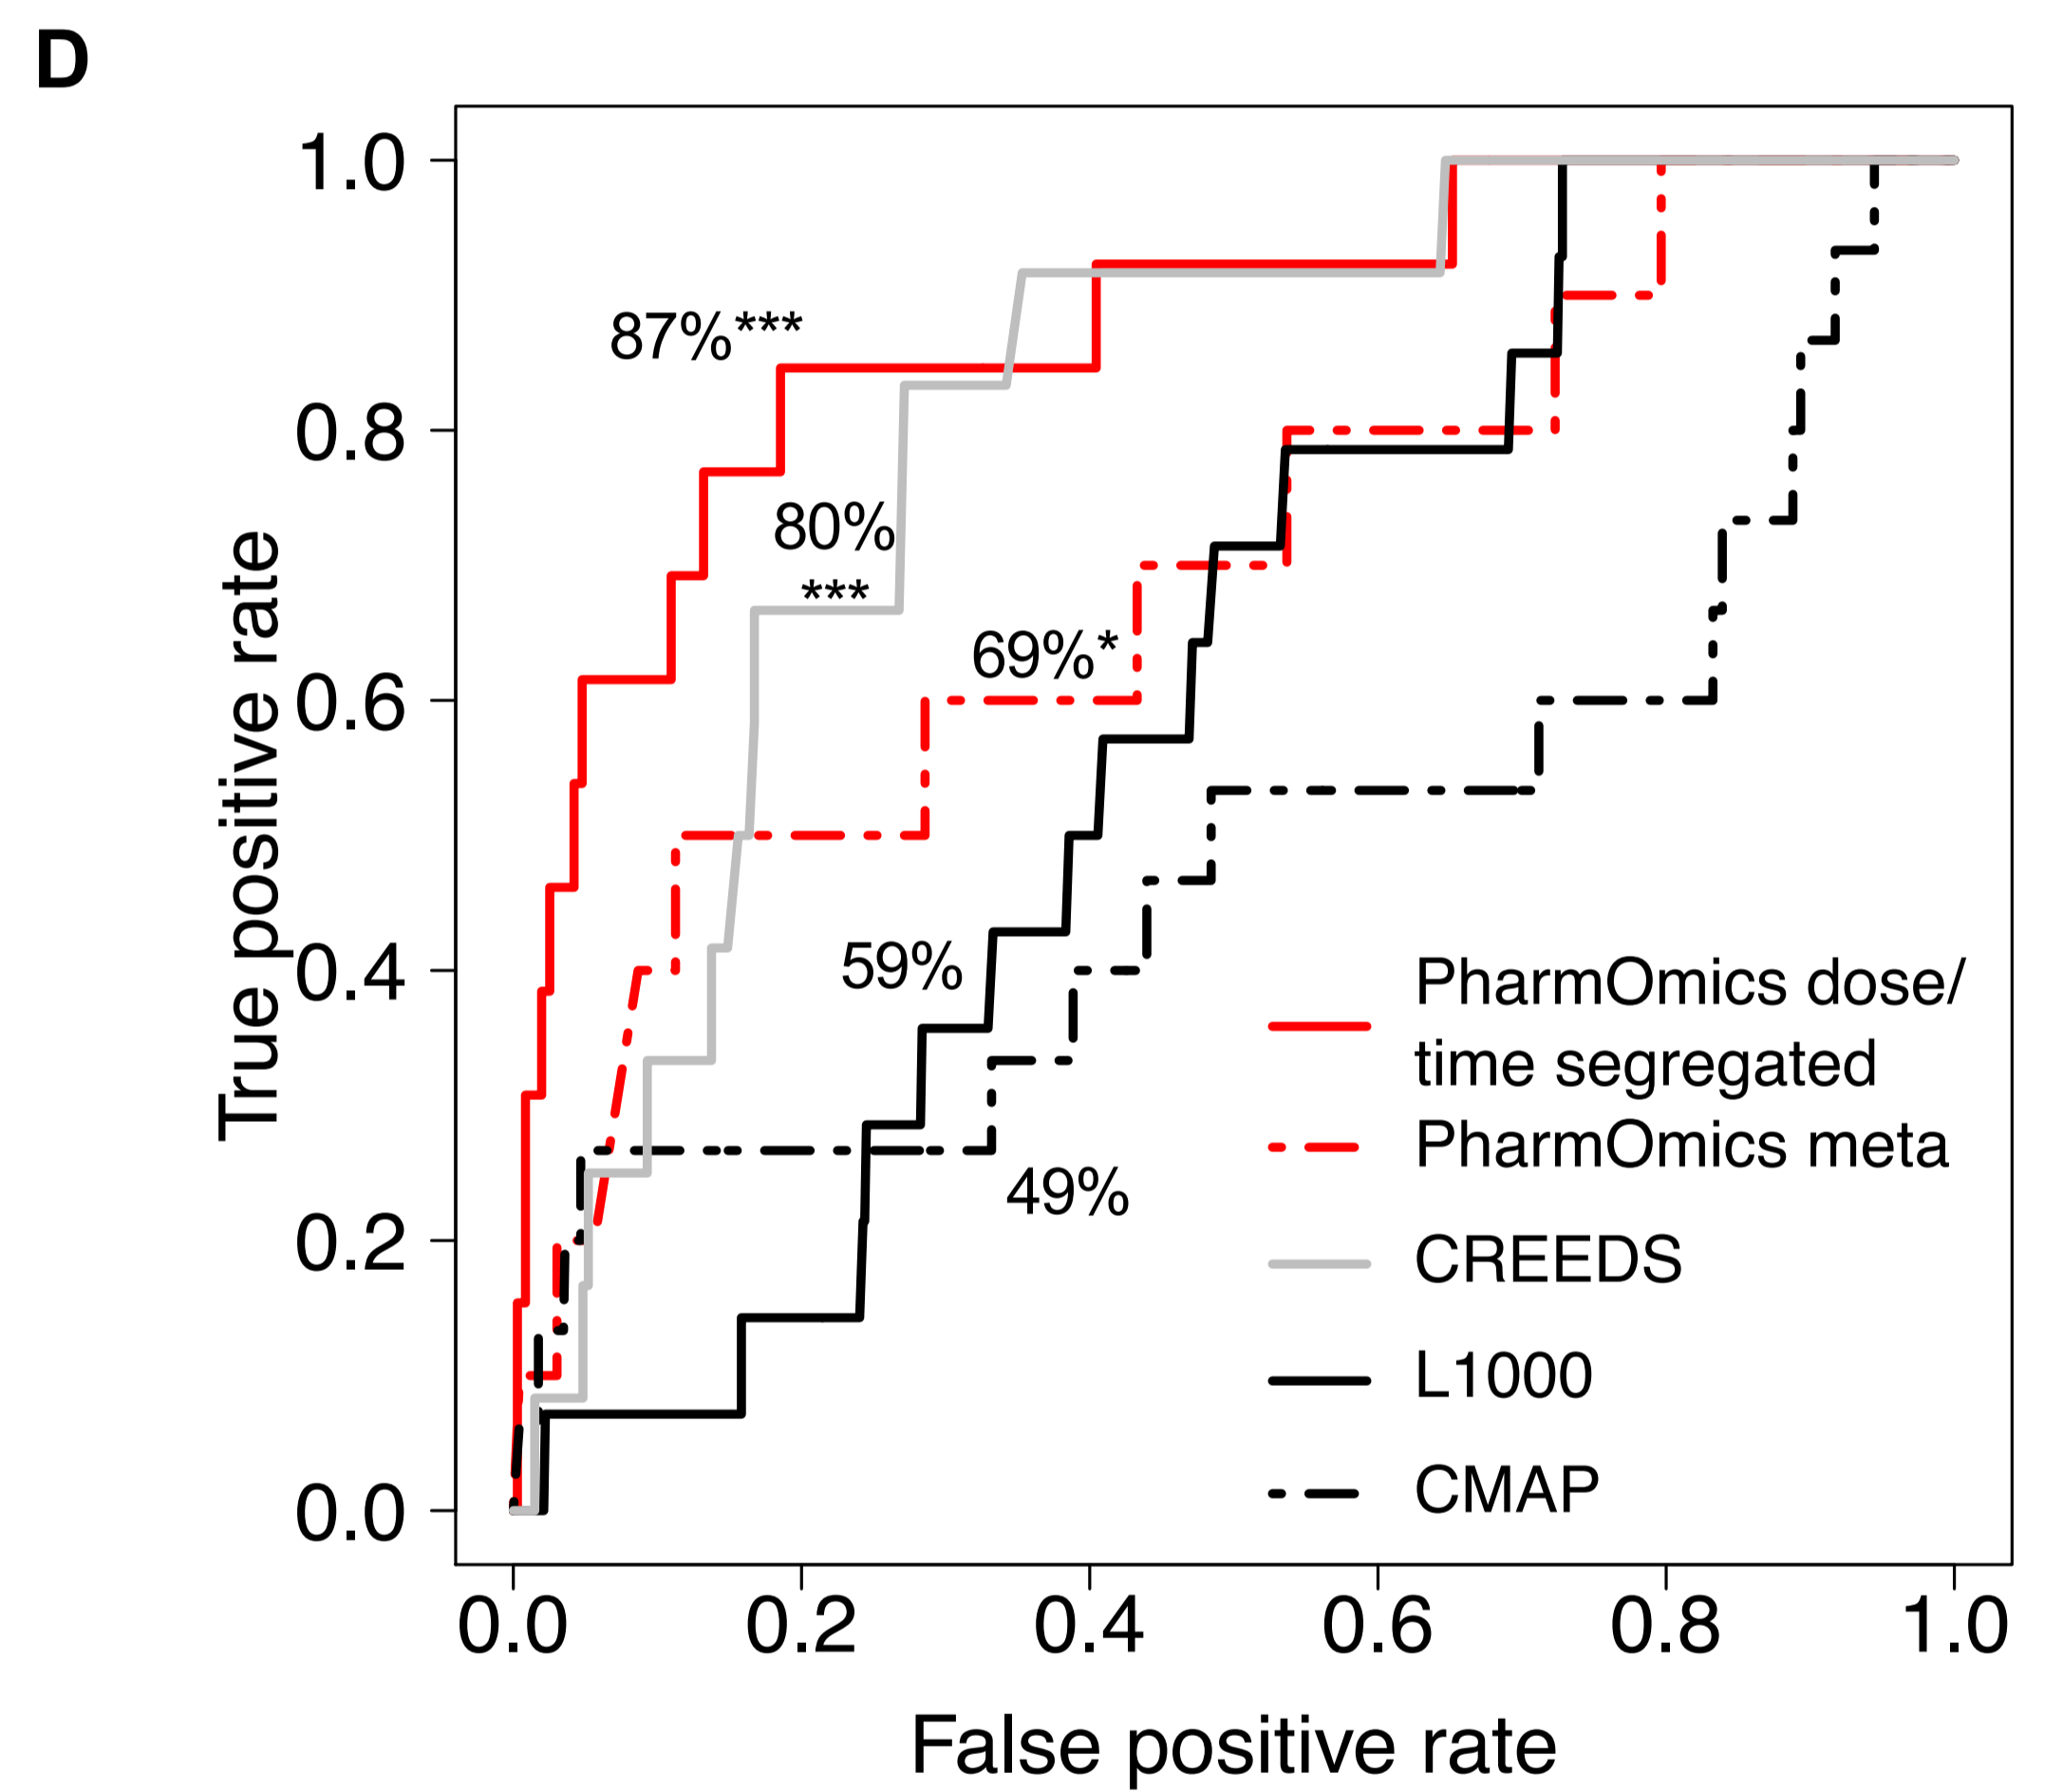

bioRxiv preprint doi: <https://doi.org/10.1101/837773>; this version posted March 30, 2021. The copyright holder for this preprint (which was not certified by peer review) is the author/funder, who has granted bioRxiv a license to display the preprint in perpetuity. It is made available under aCC-BY-NC-ND 4.0 International license.

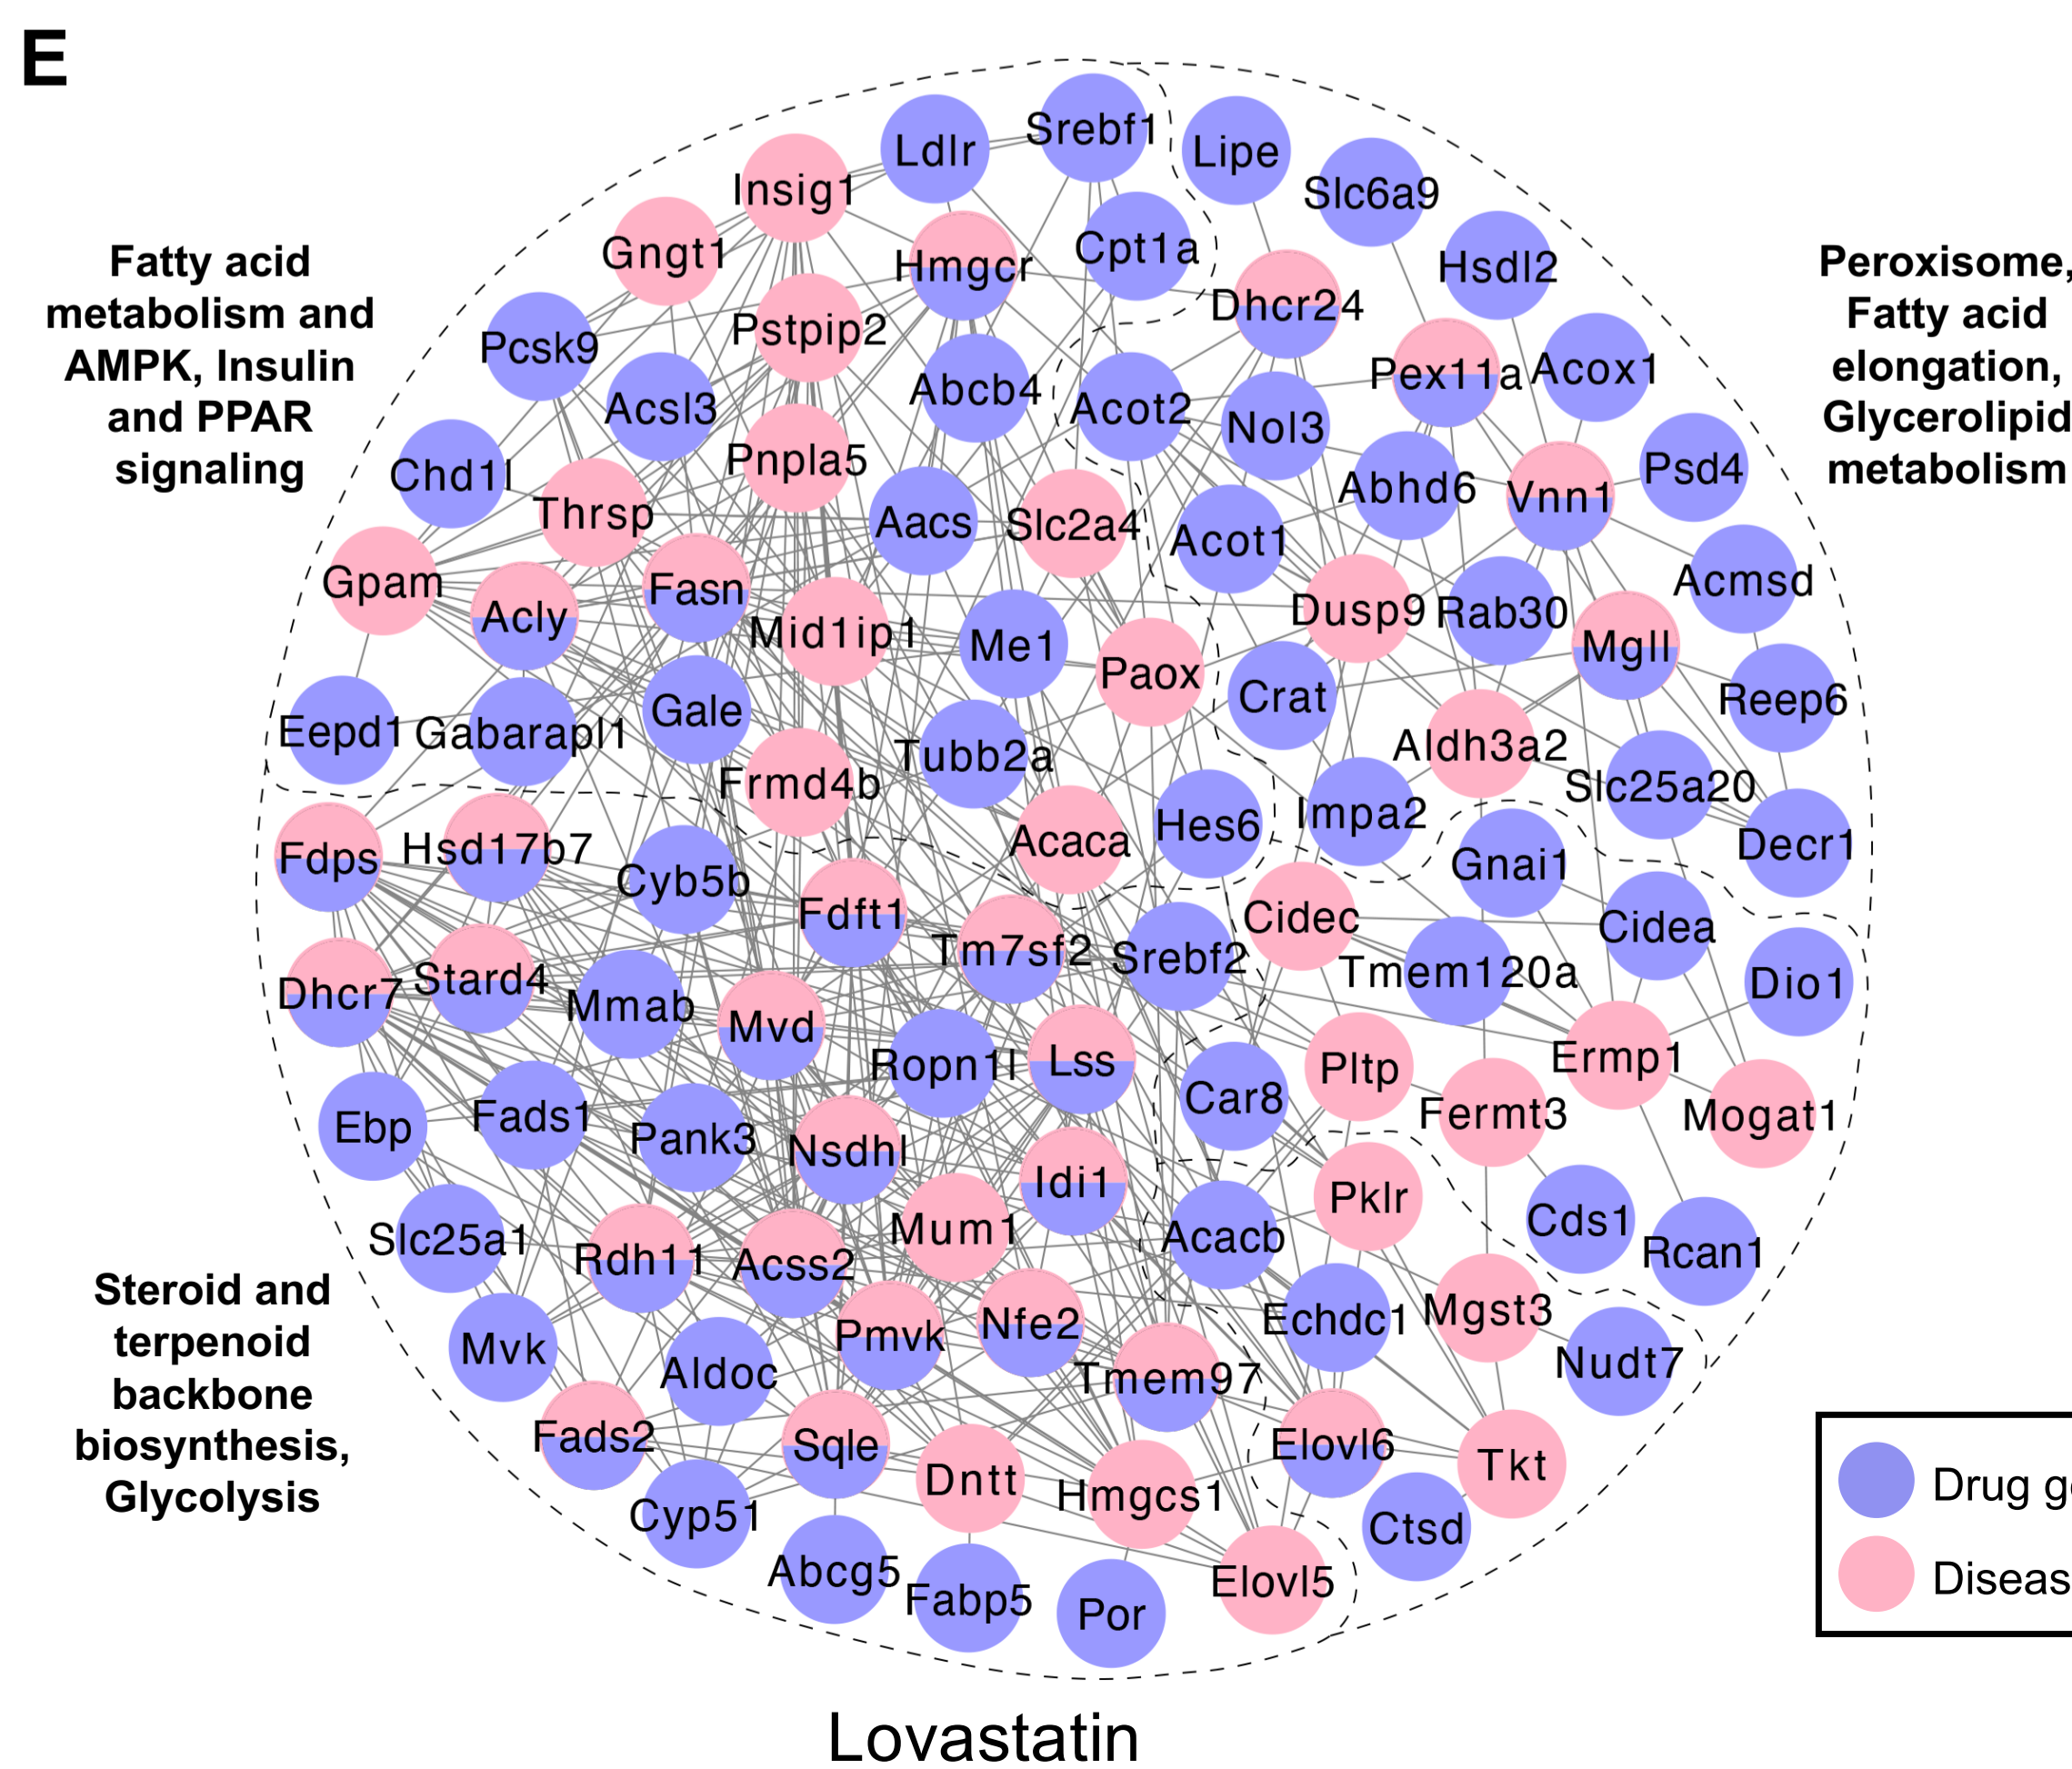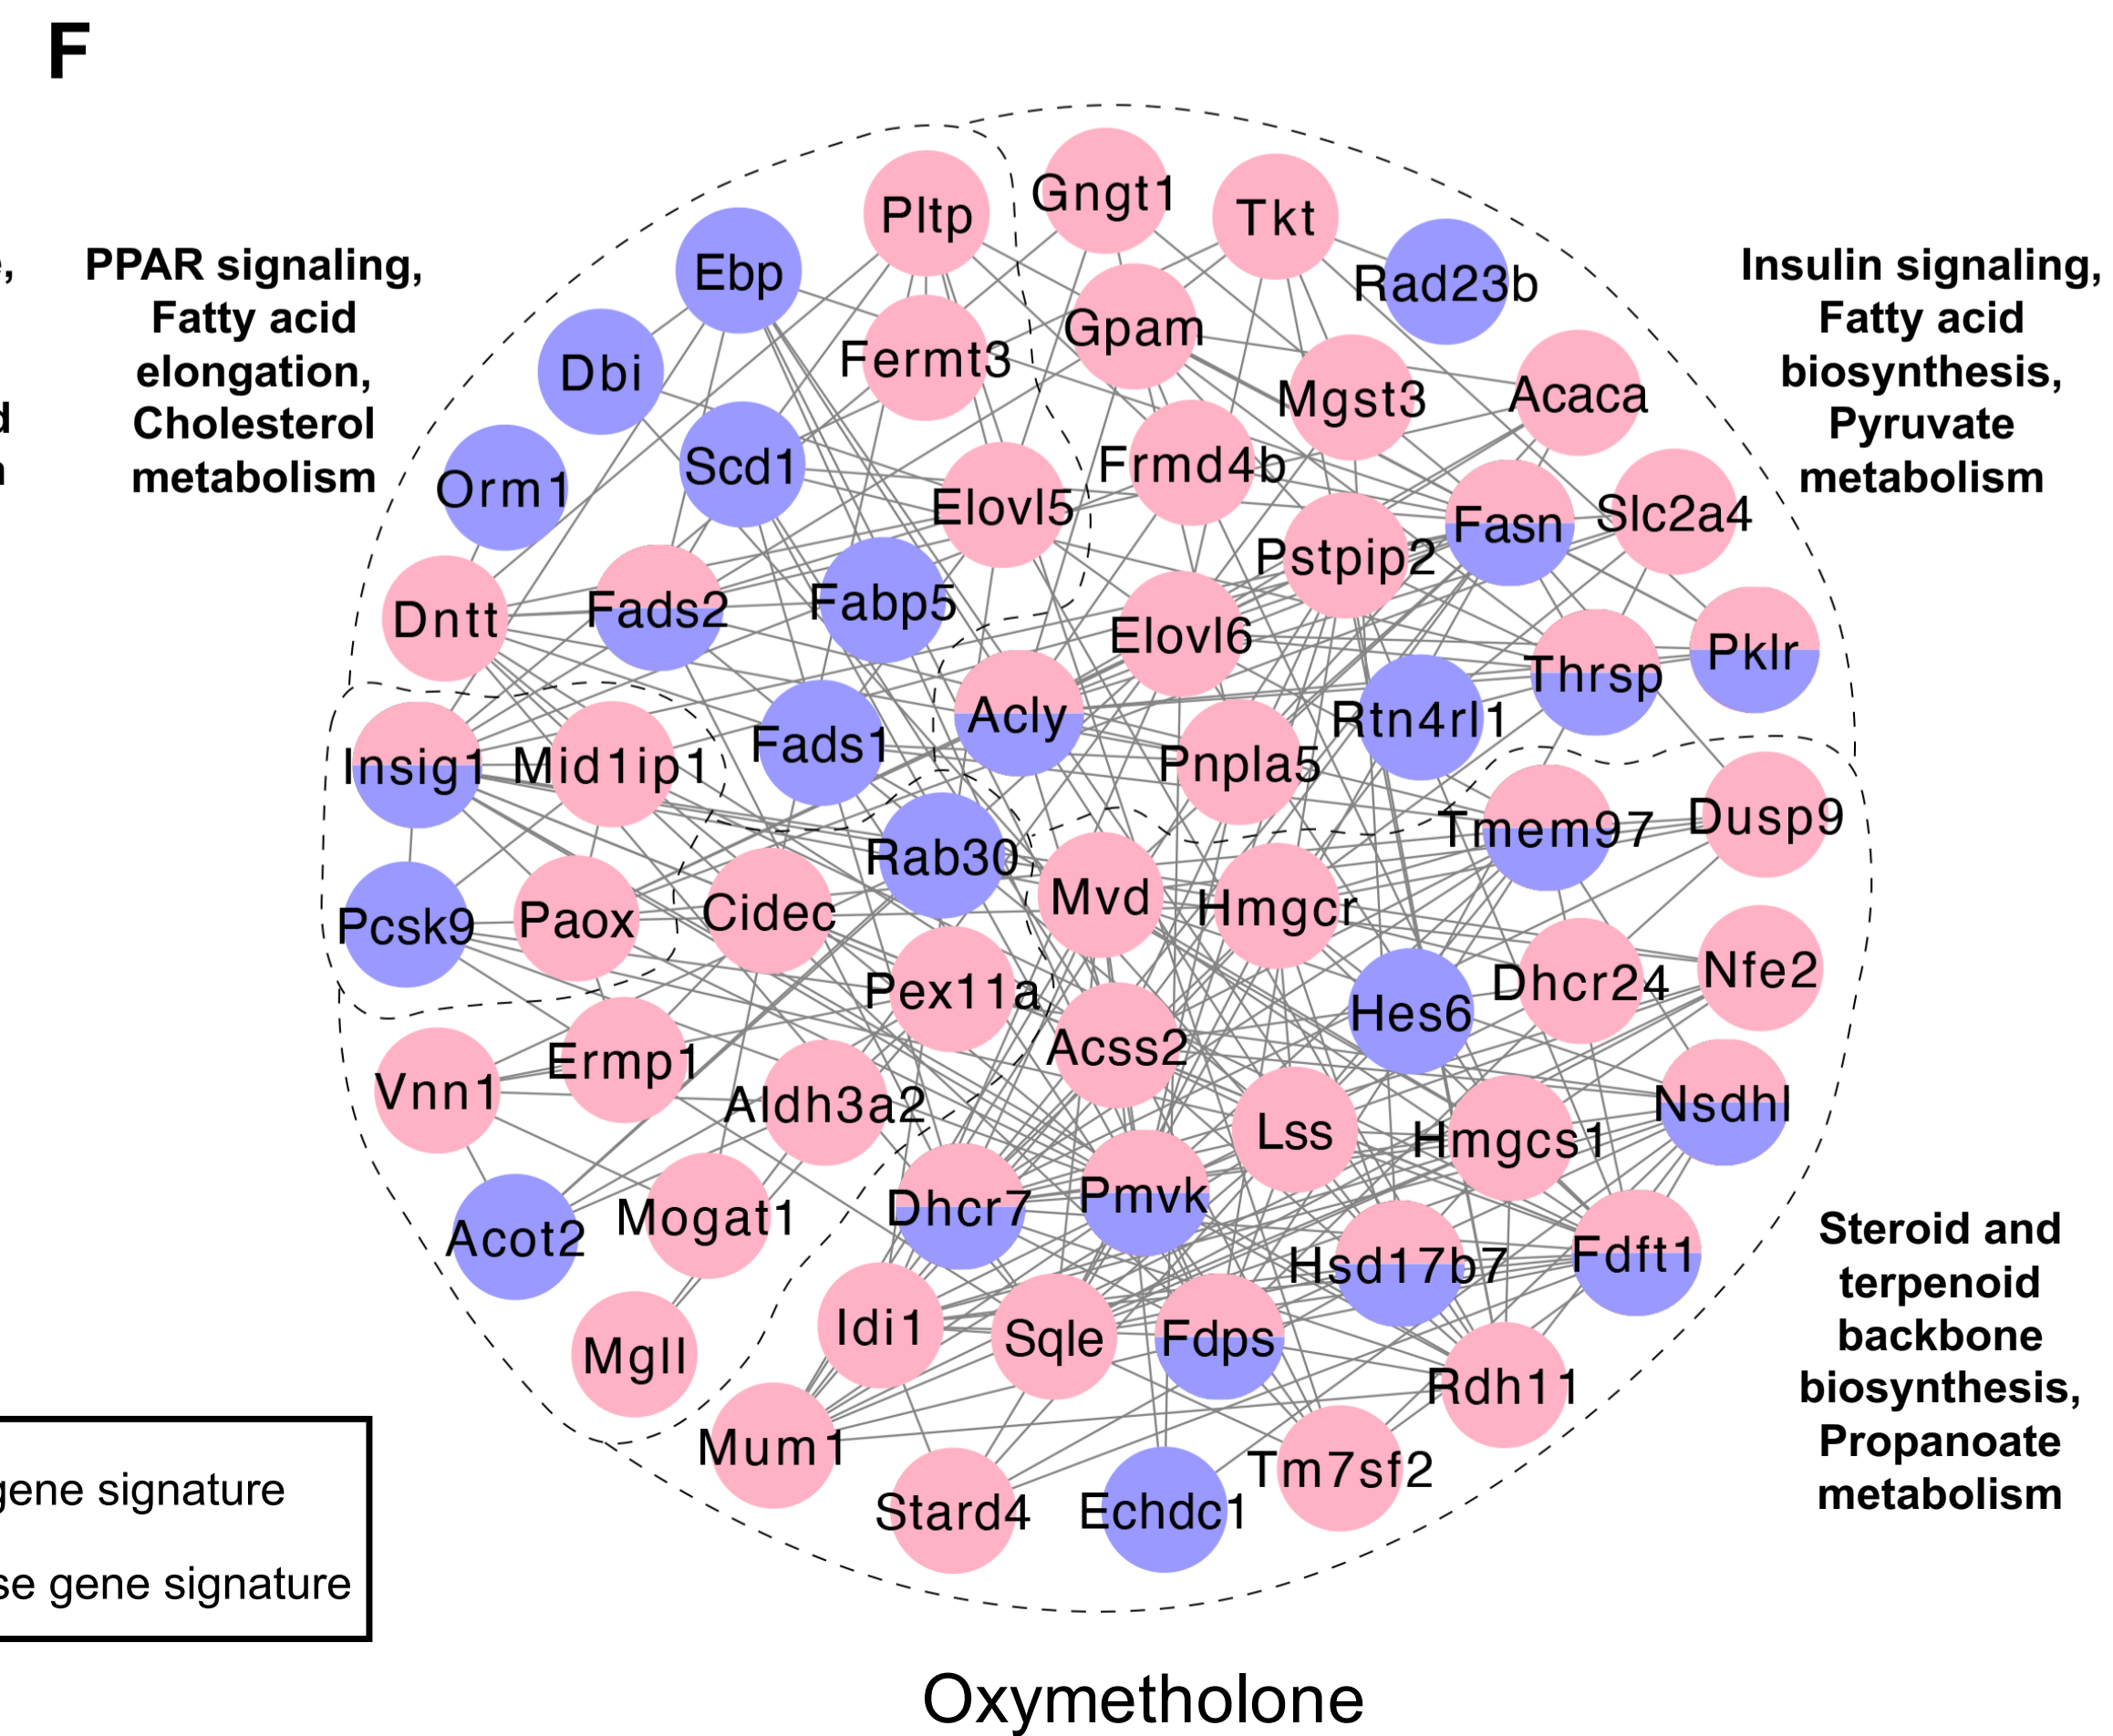



A

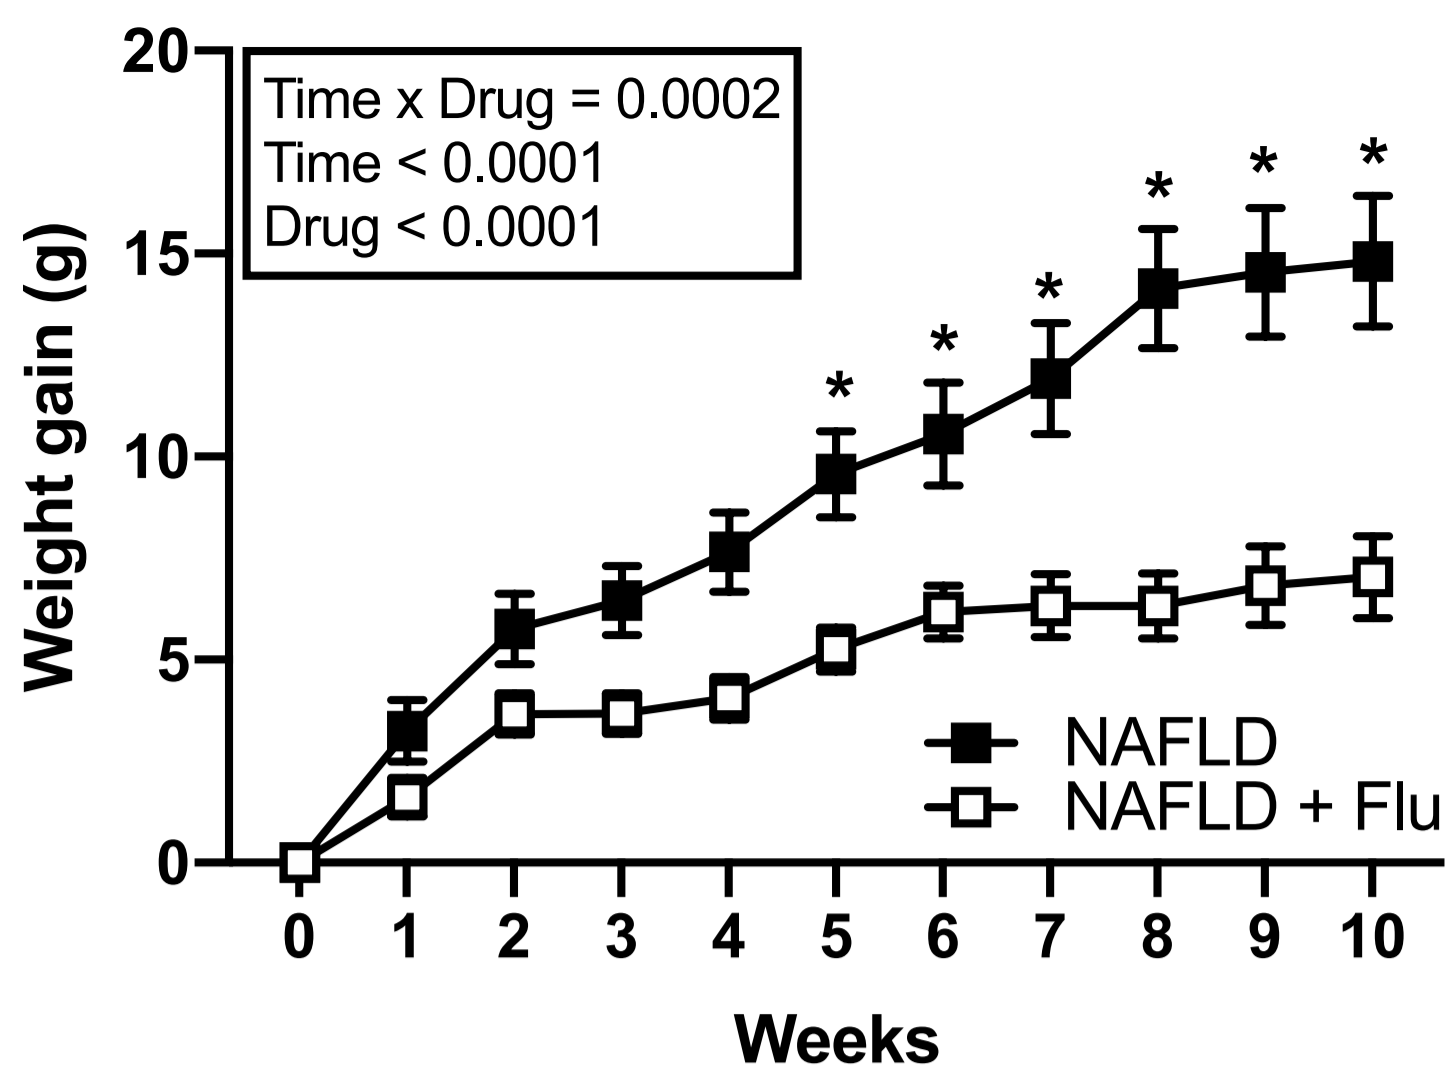

B

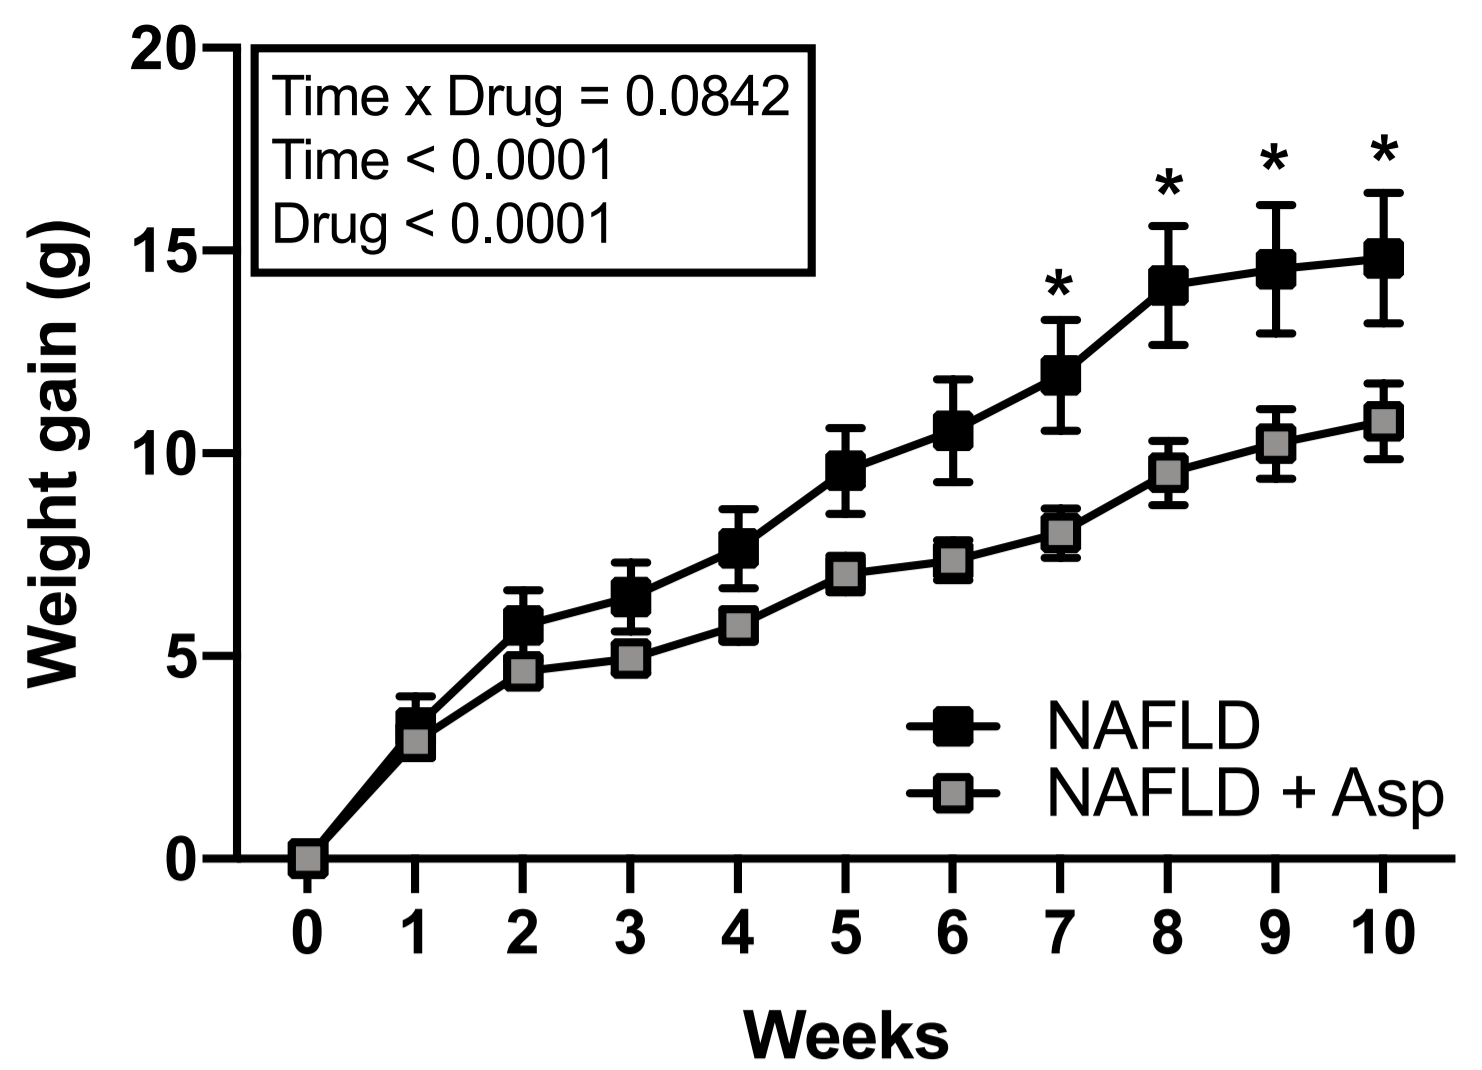

C

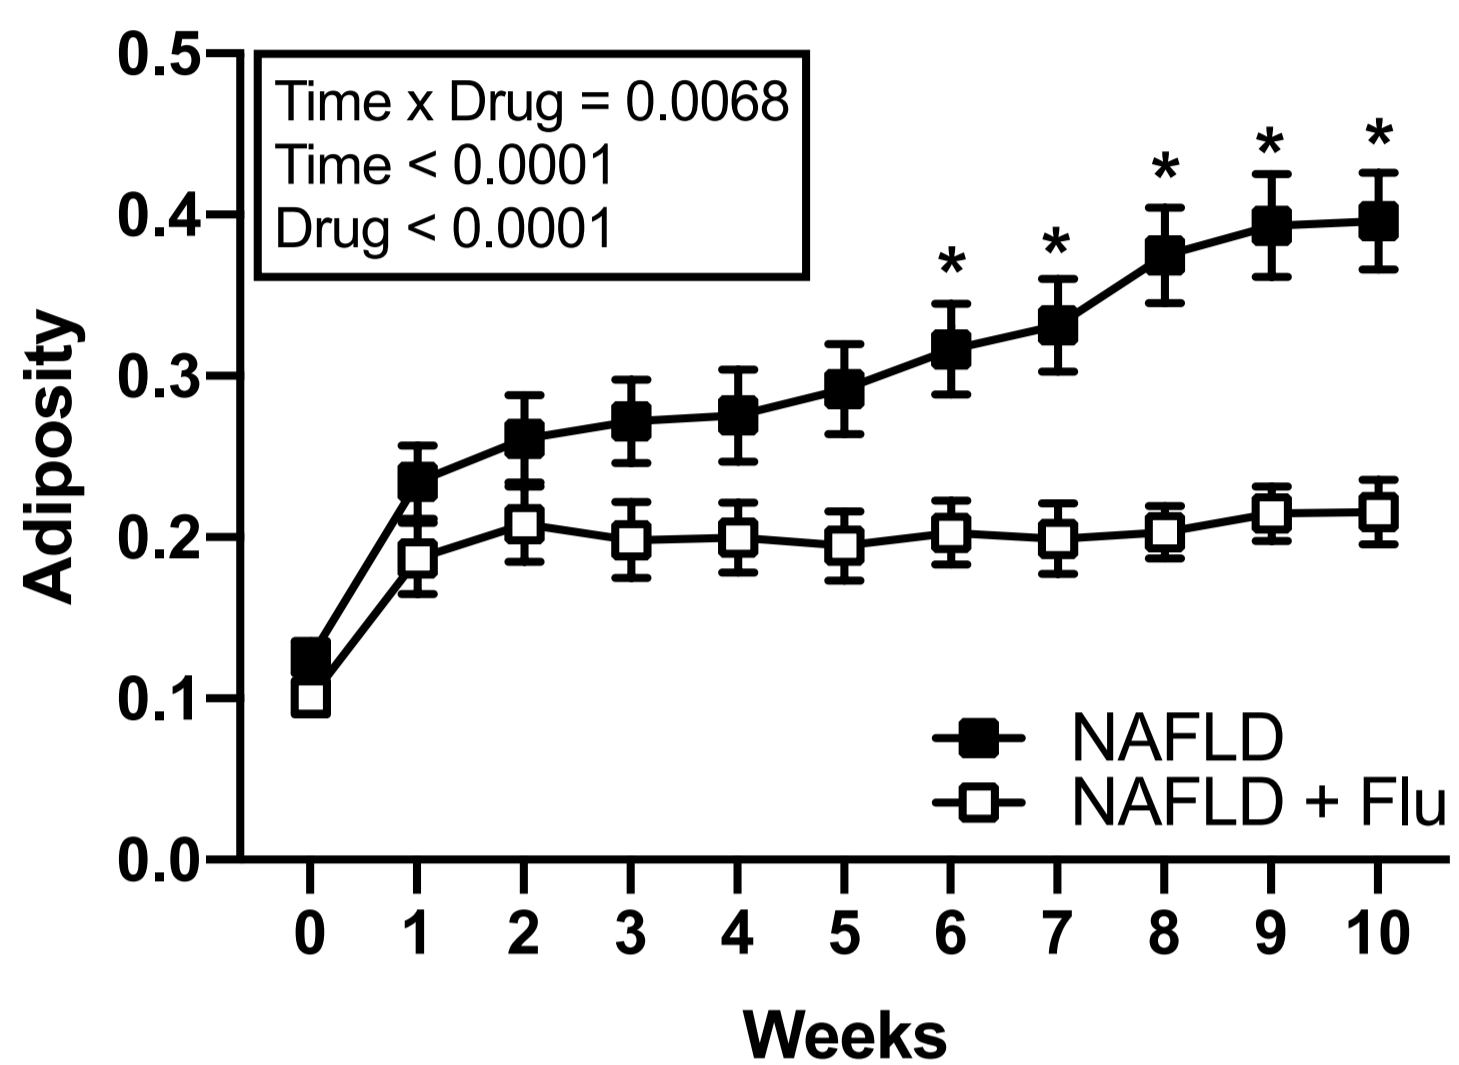

D

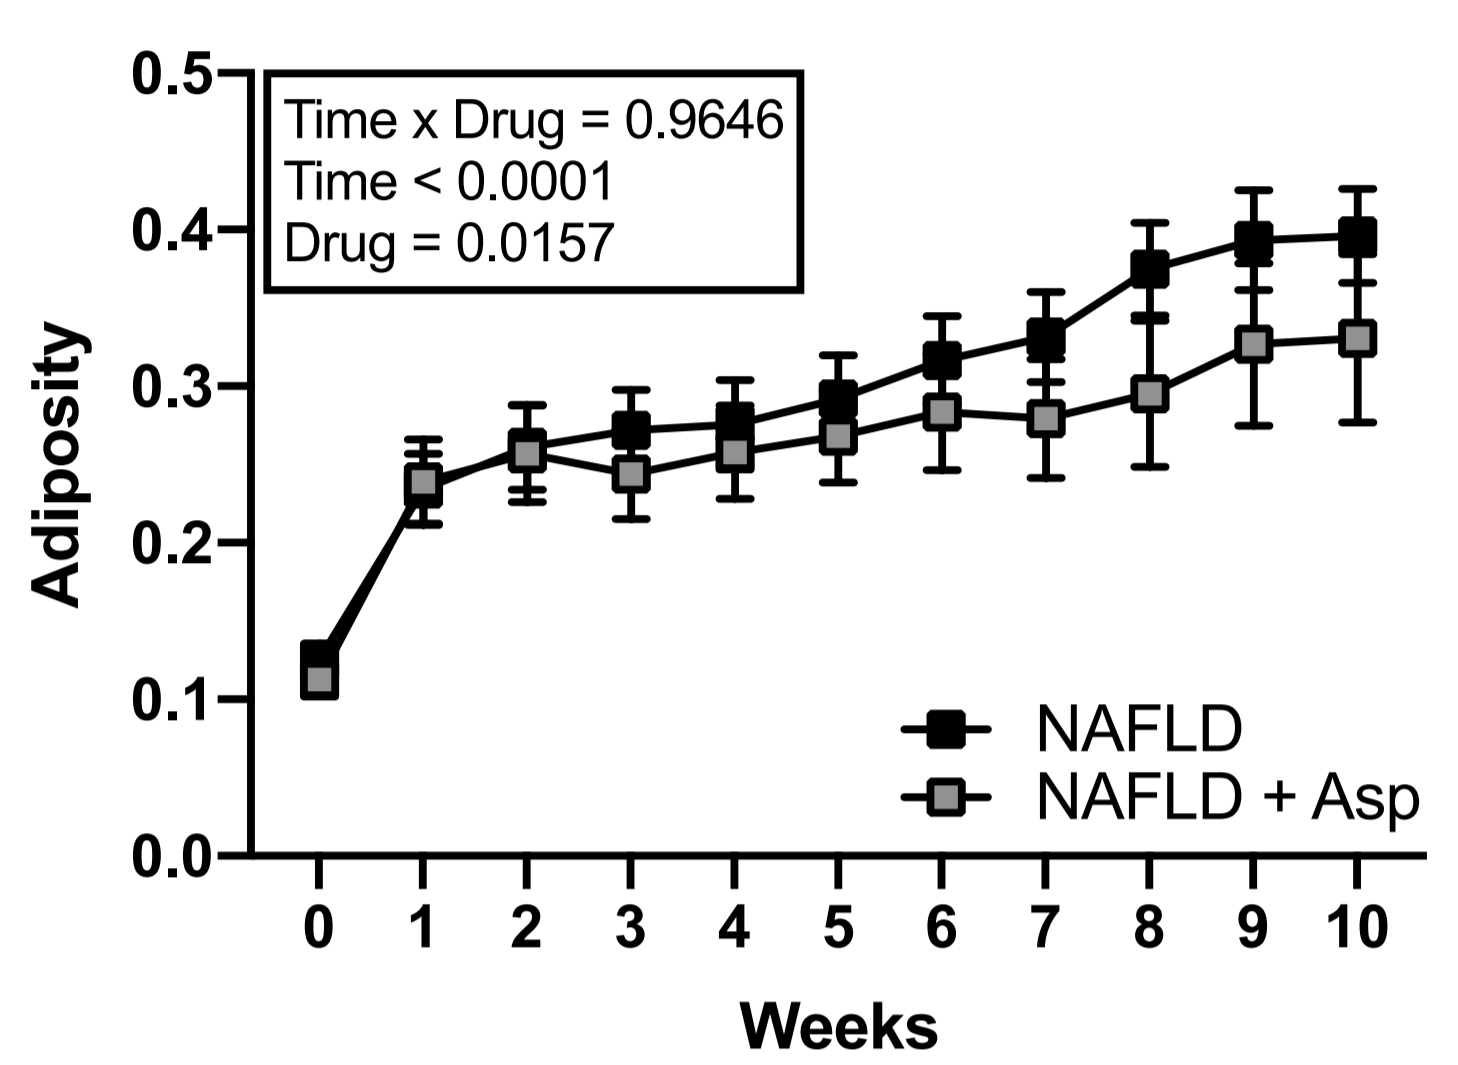

E

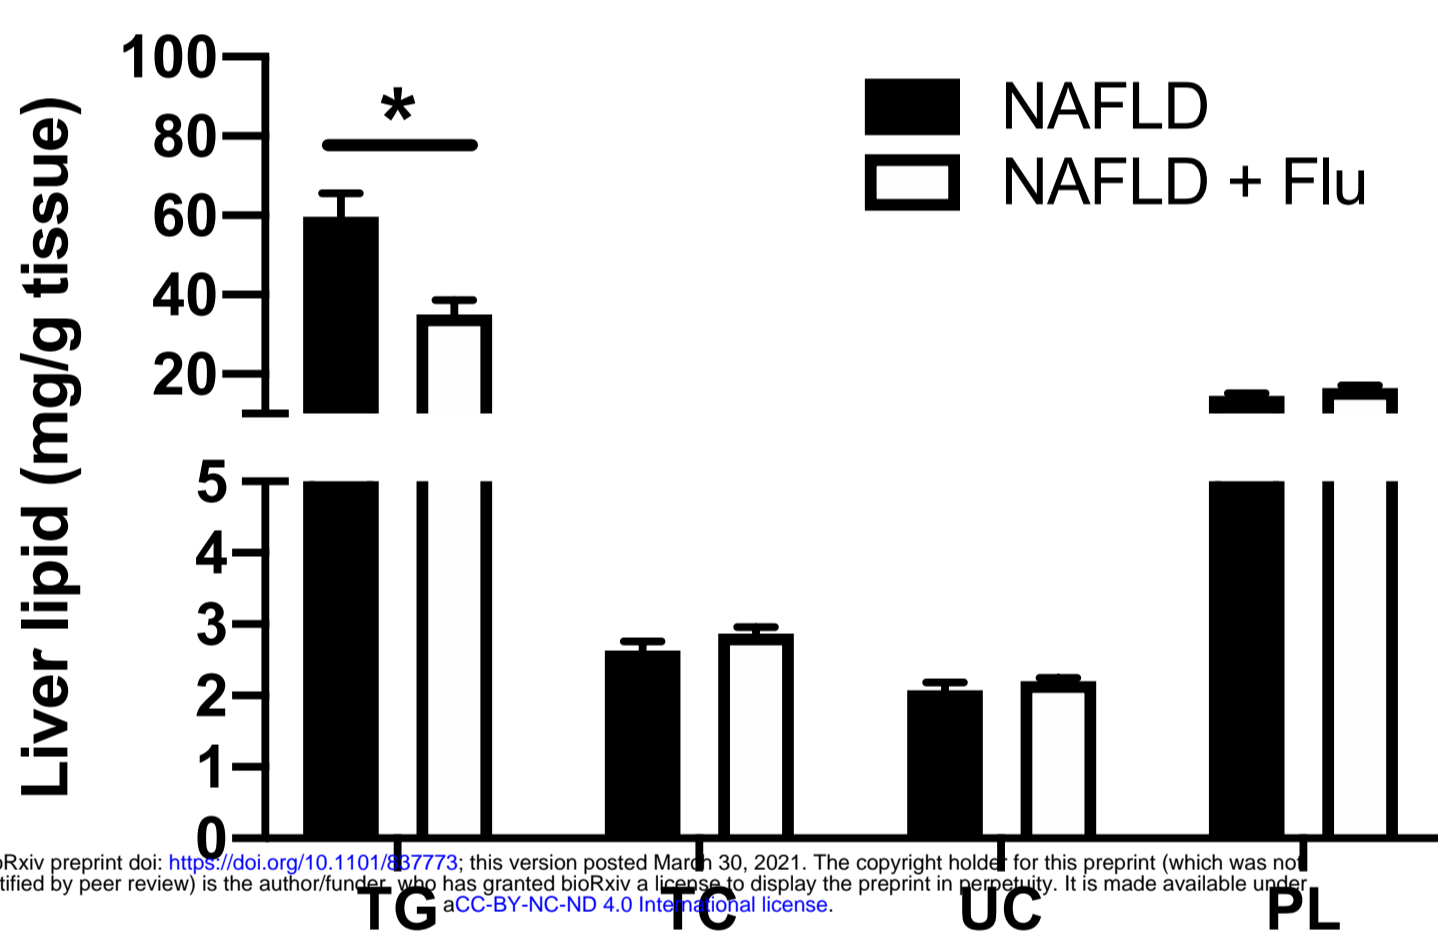

F

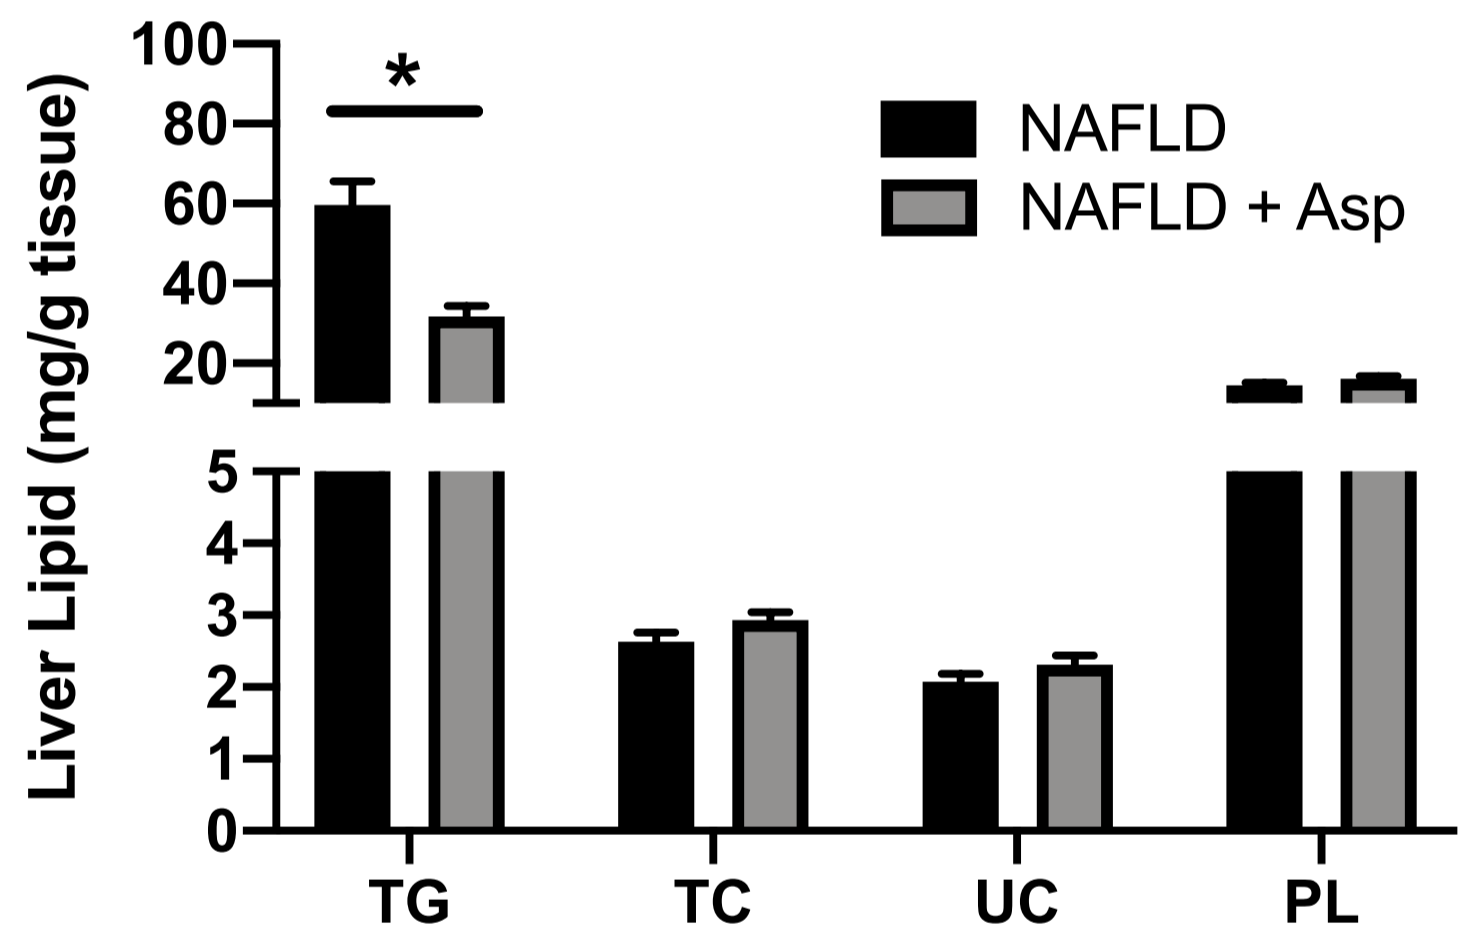

bioRxiv preprint doi: <https://doi.org/10.1101/2021.03.30.2021.03.30.2021.03.30>; this version posted March 30, 2021. The copyright holder for this preprint (which was not certified by peer review) is the author/funder, who has granted bioRxiv a license to display the preprint in perpetuity. It is made available under aCC-BY-NC-ND 4.0 International license.

G

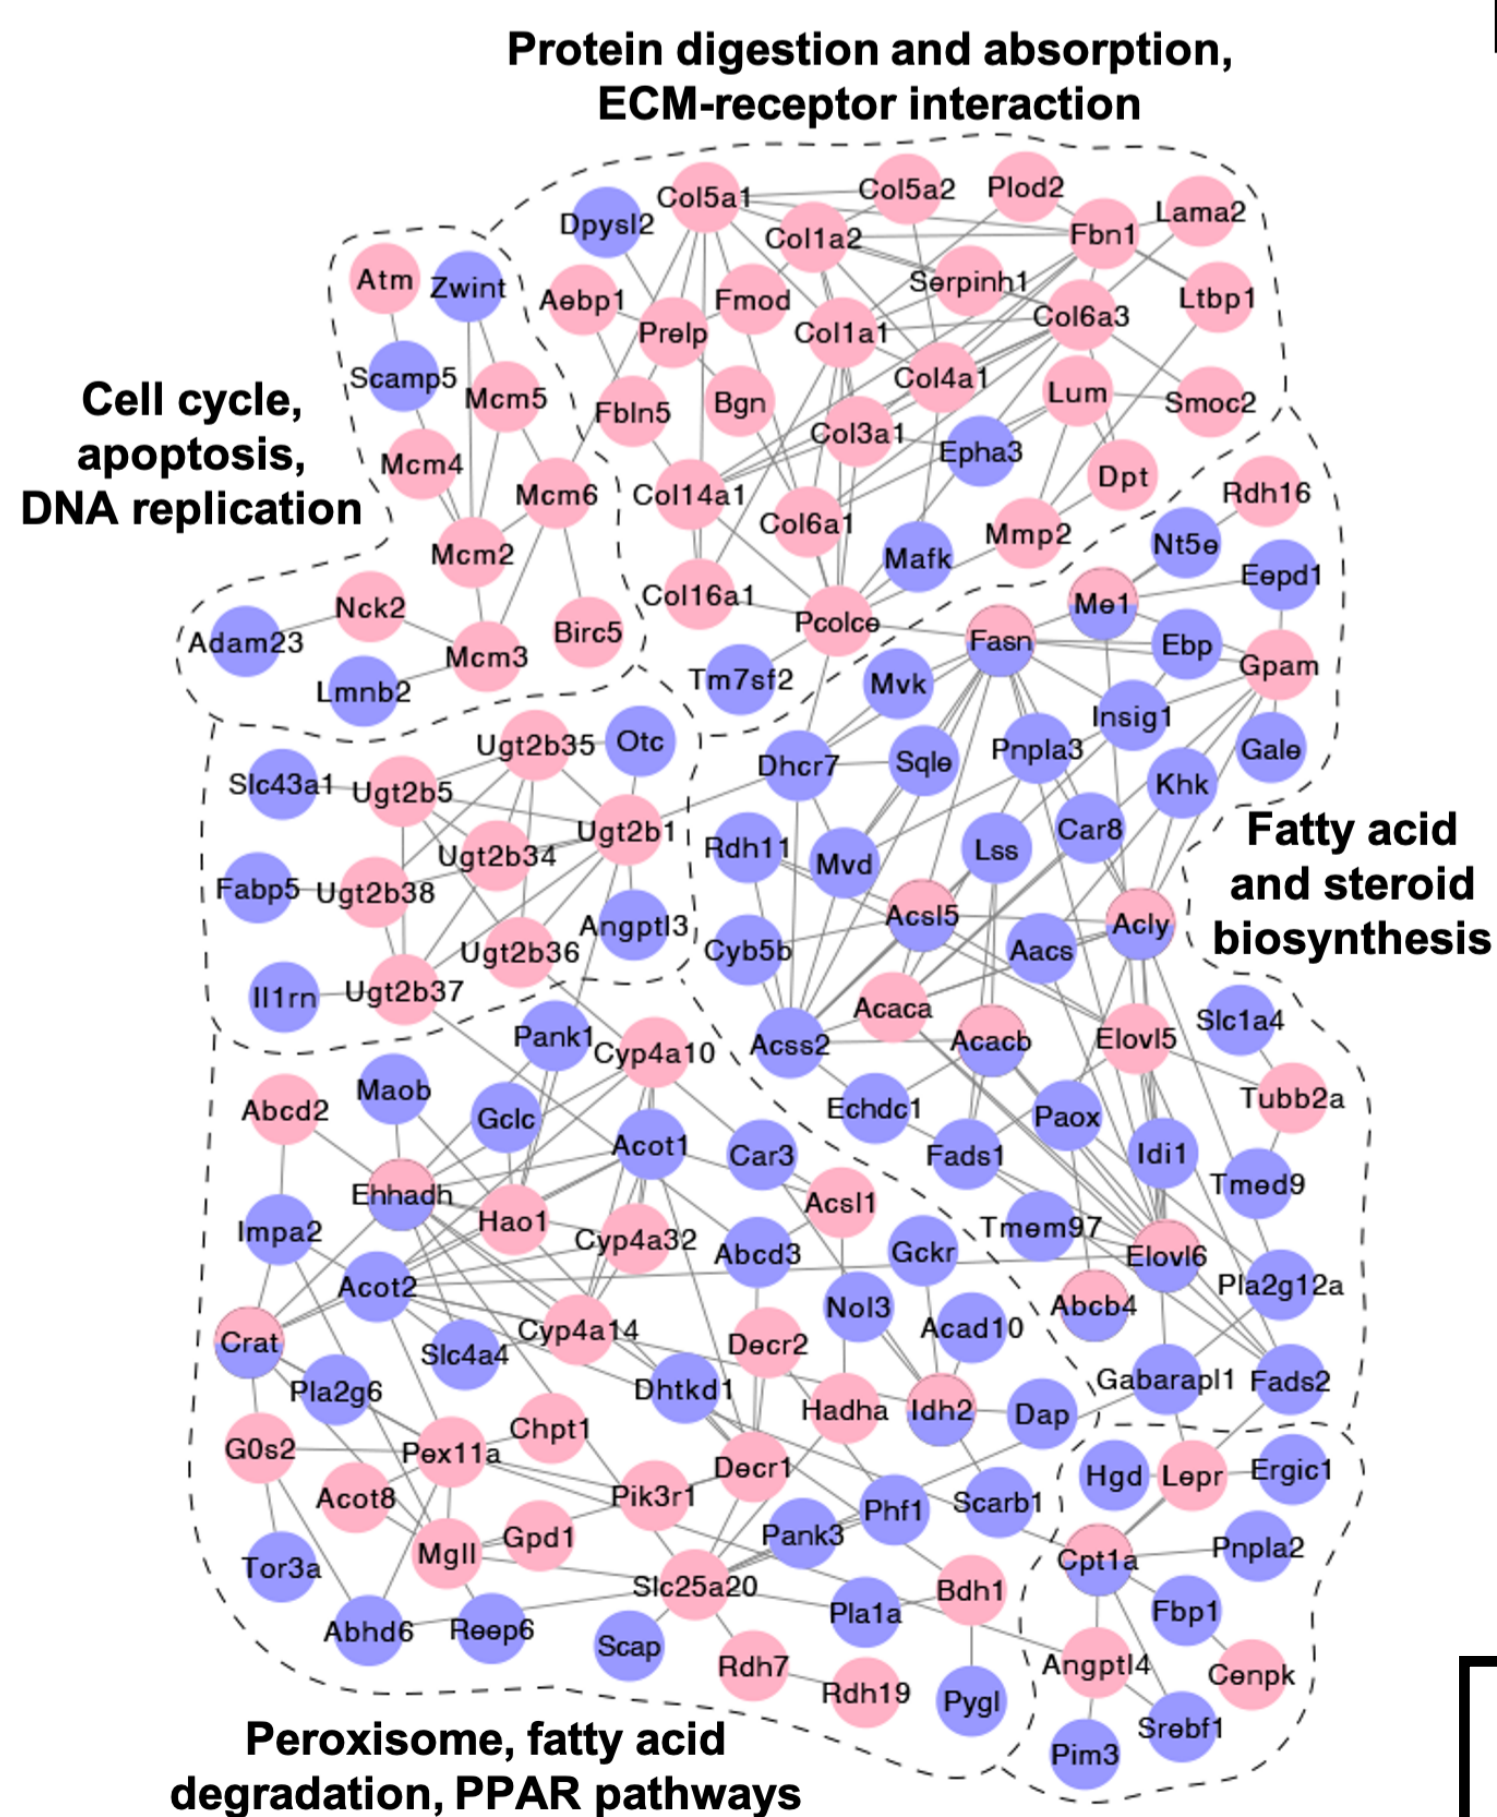

H

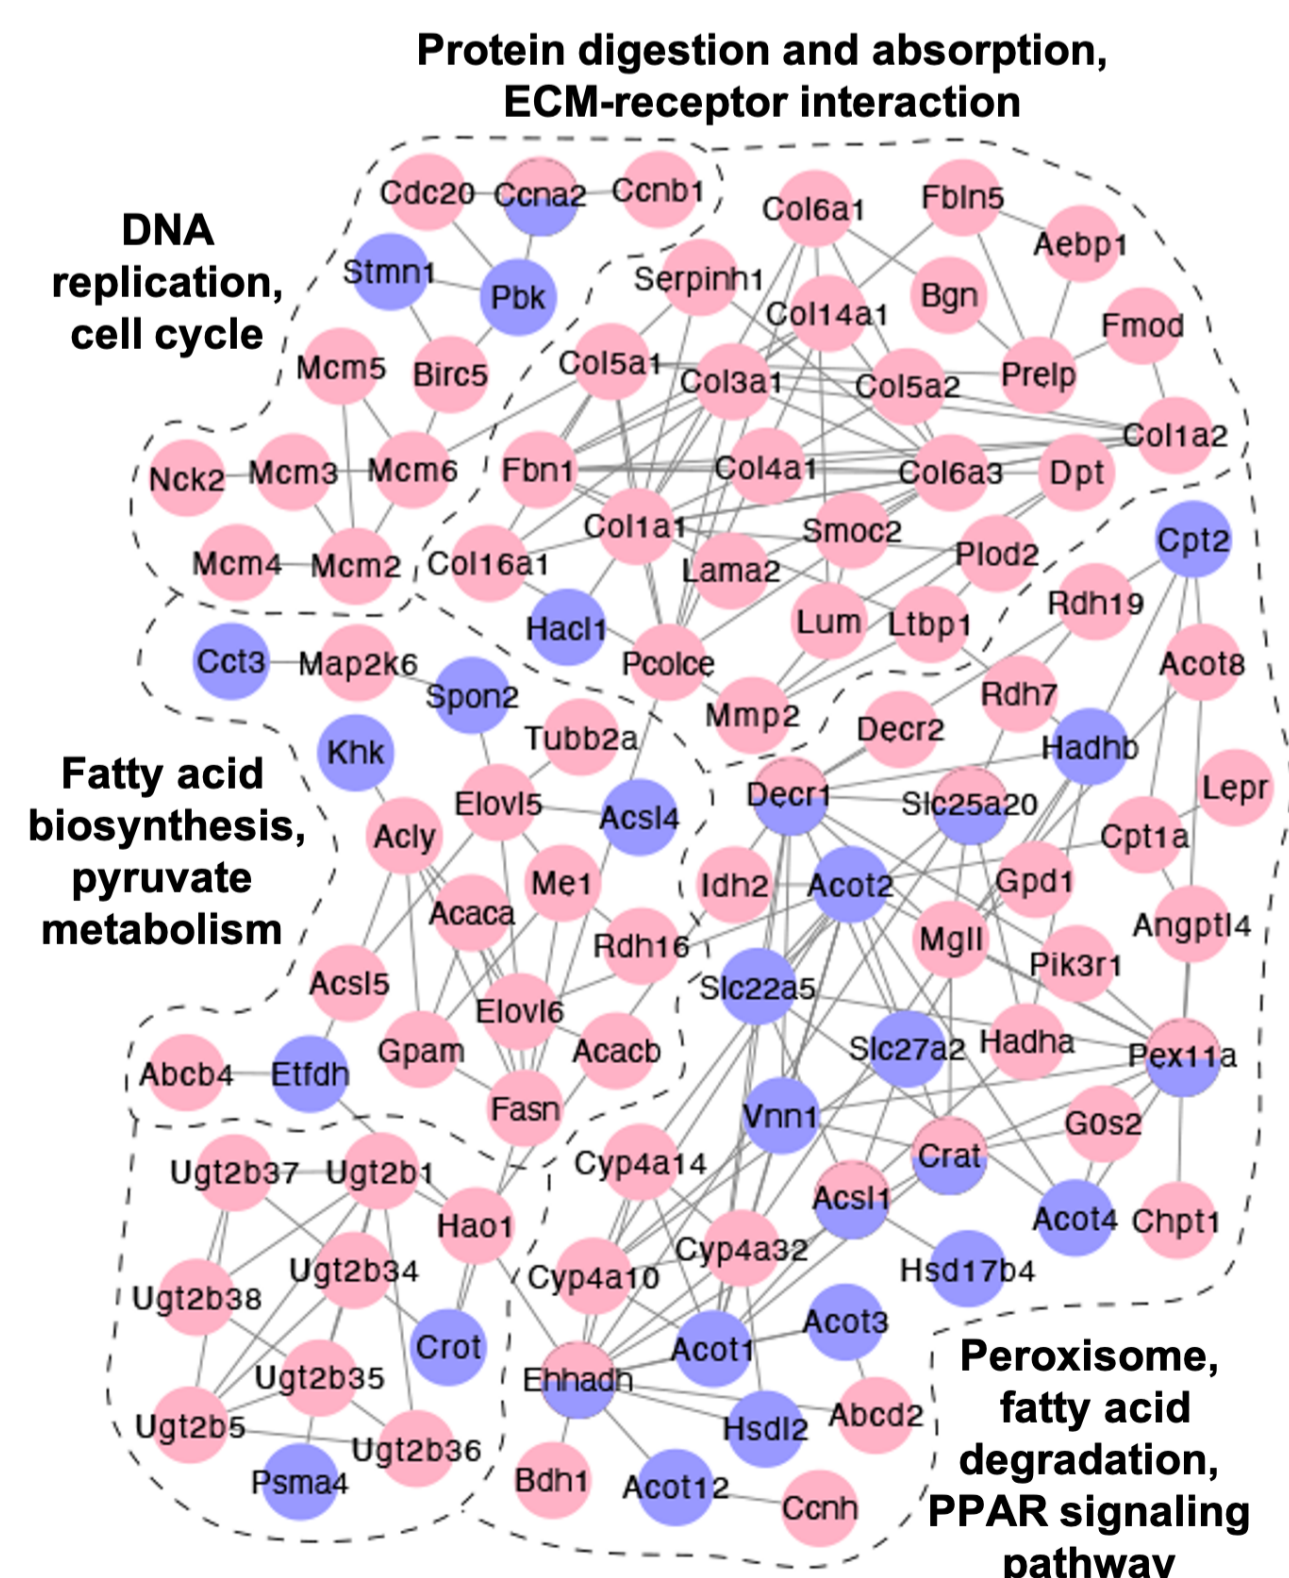



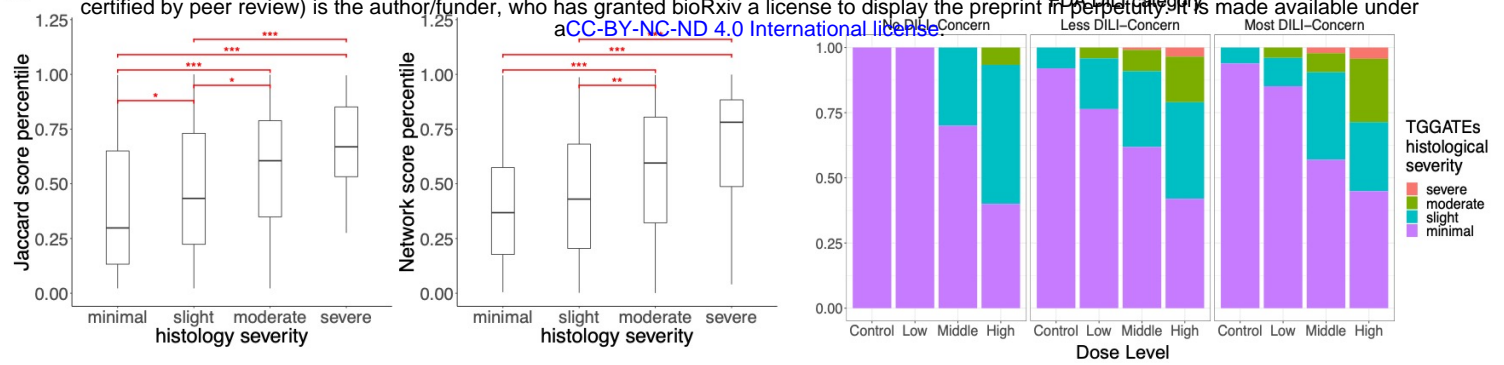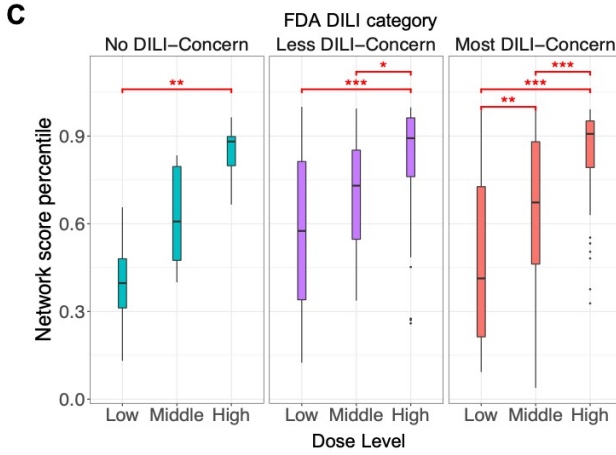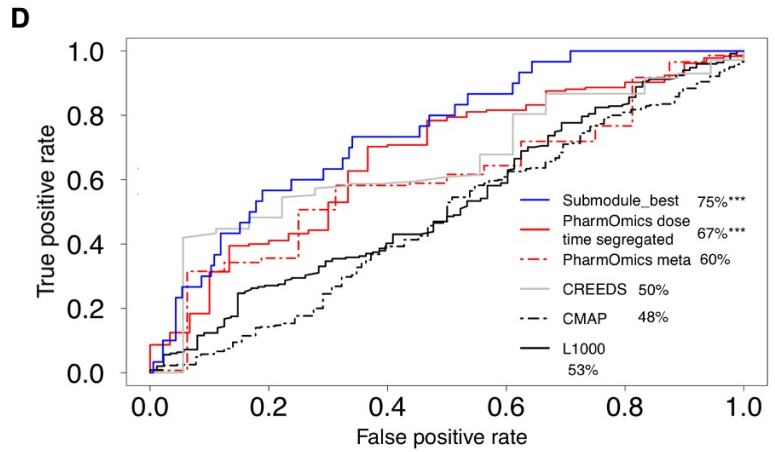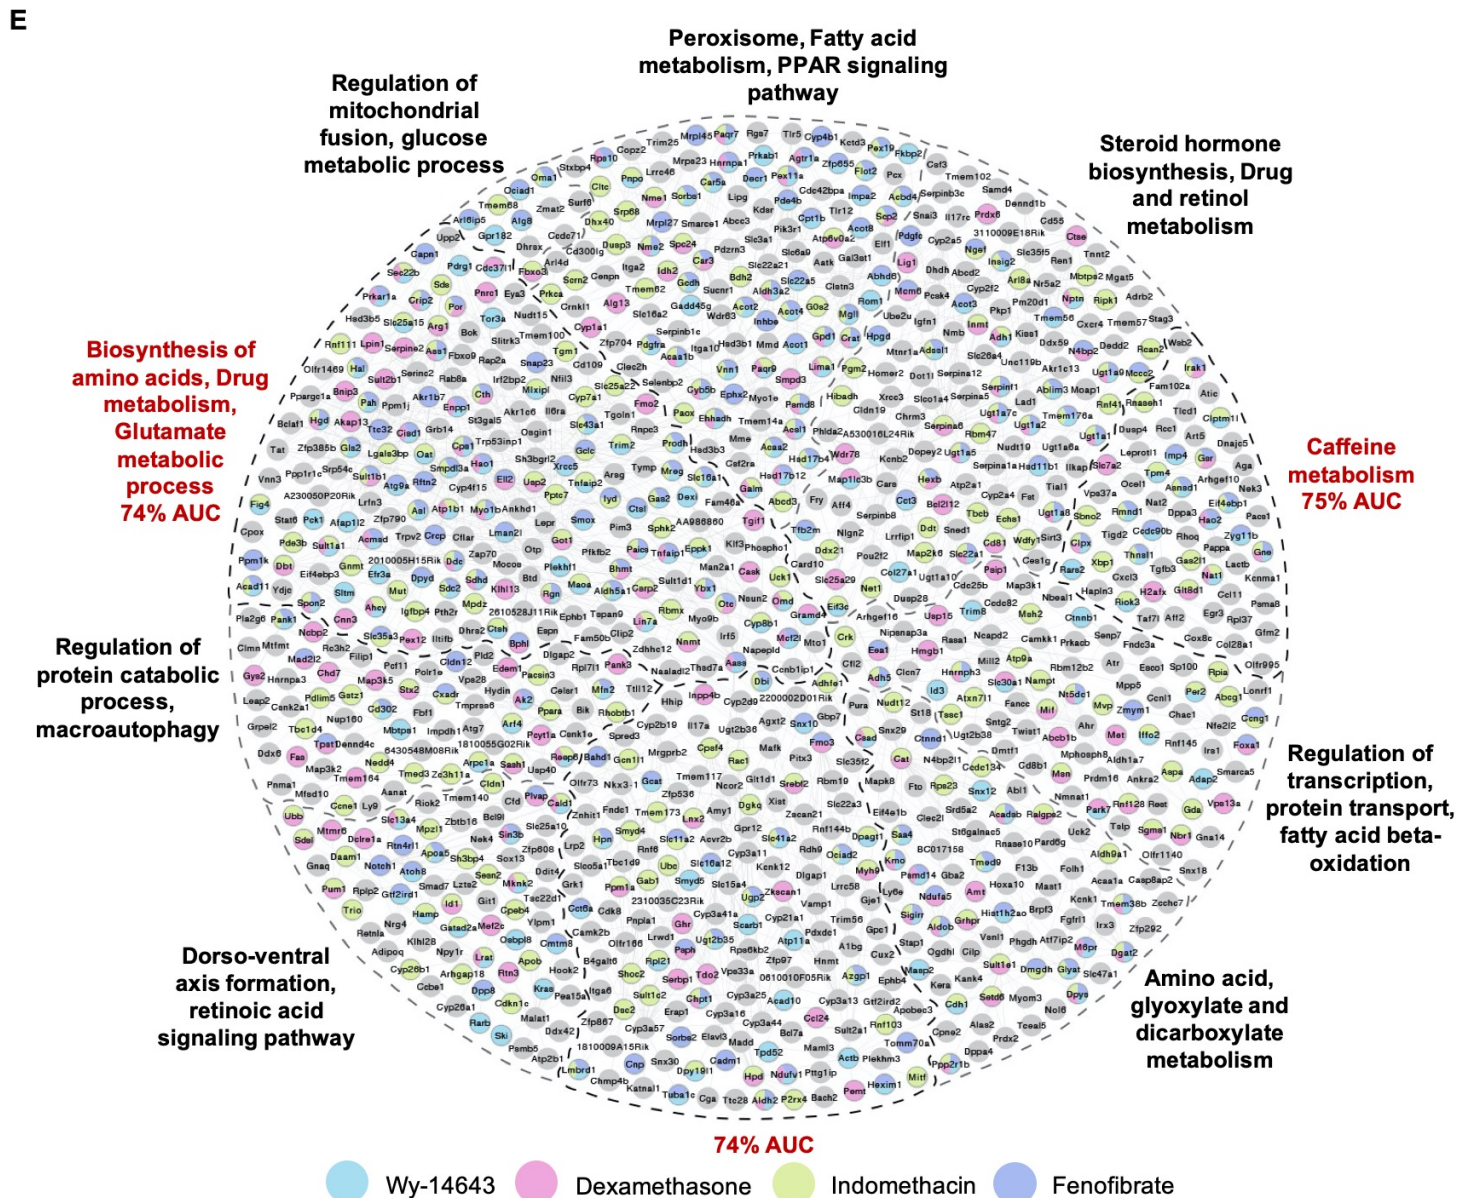



**A**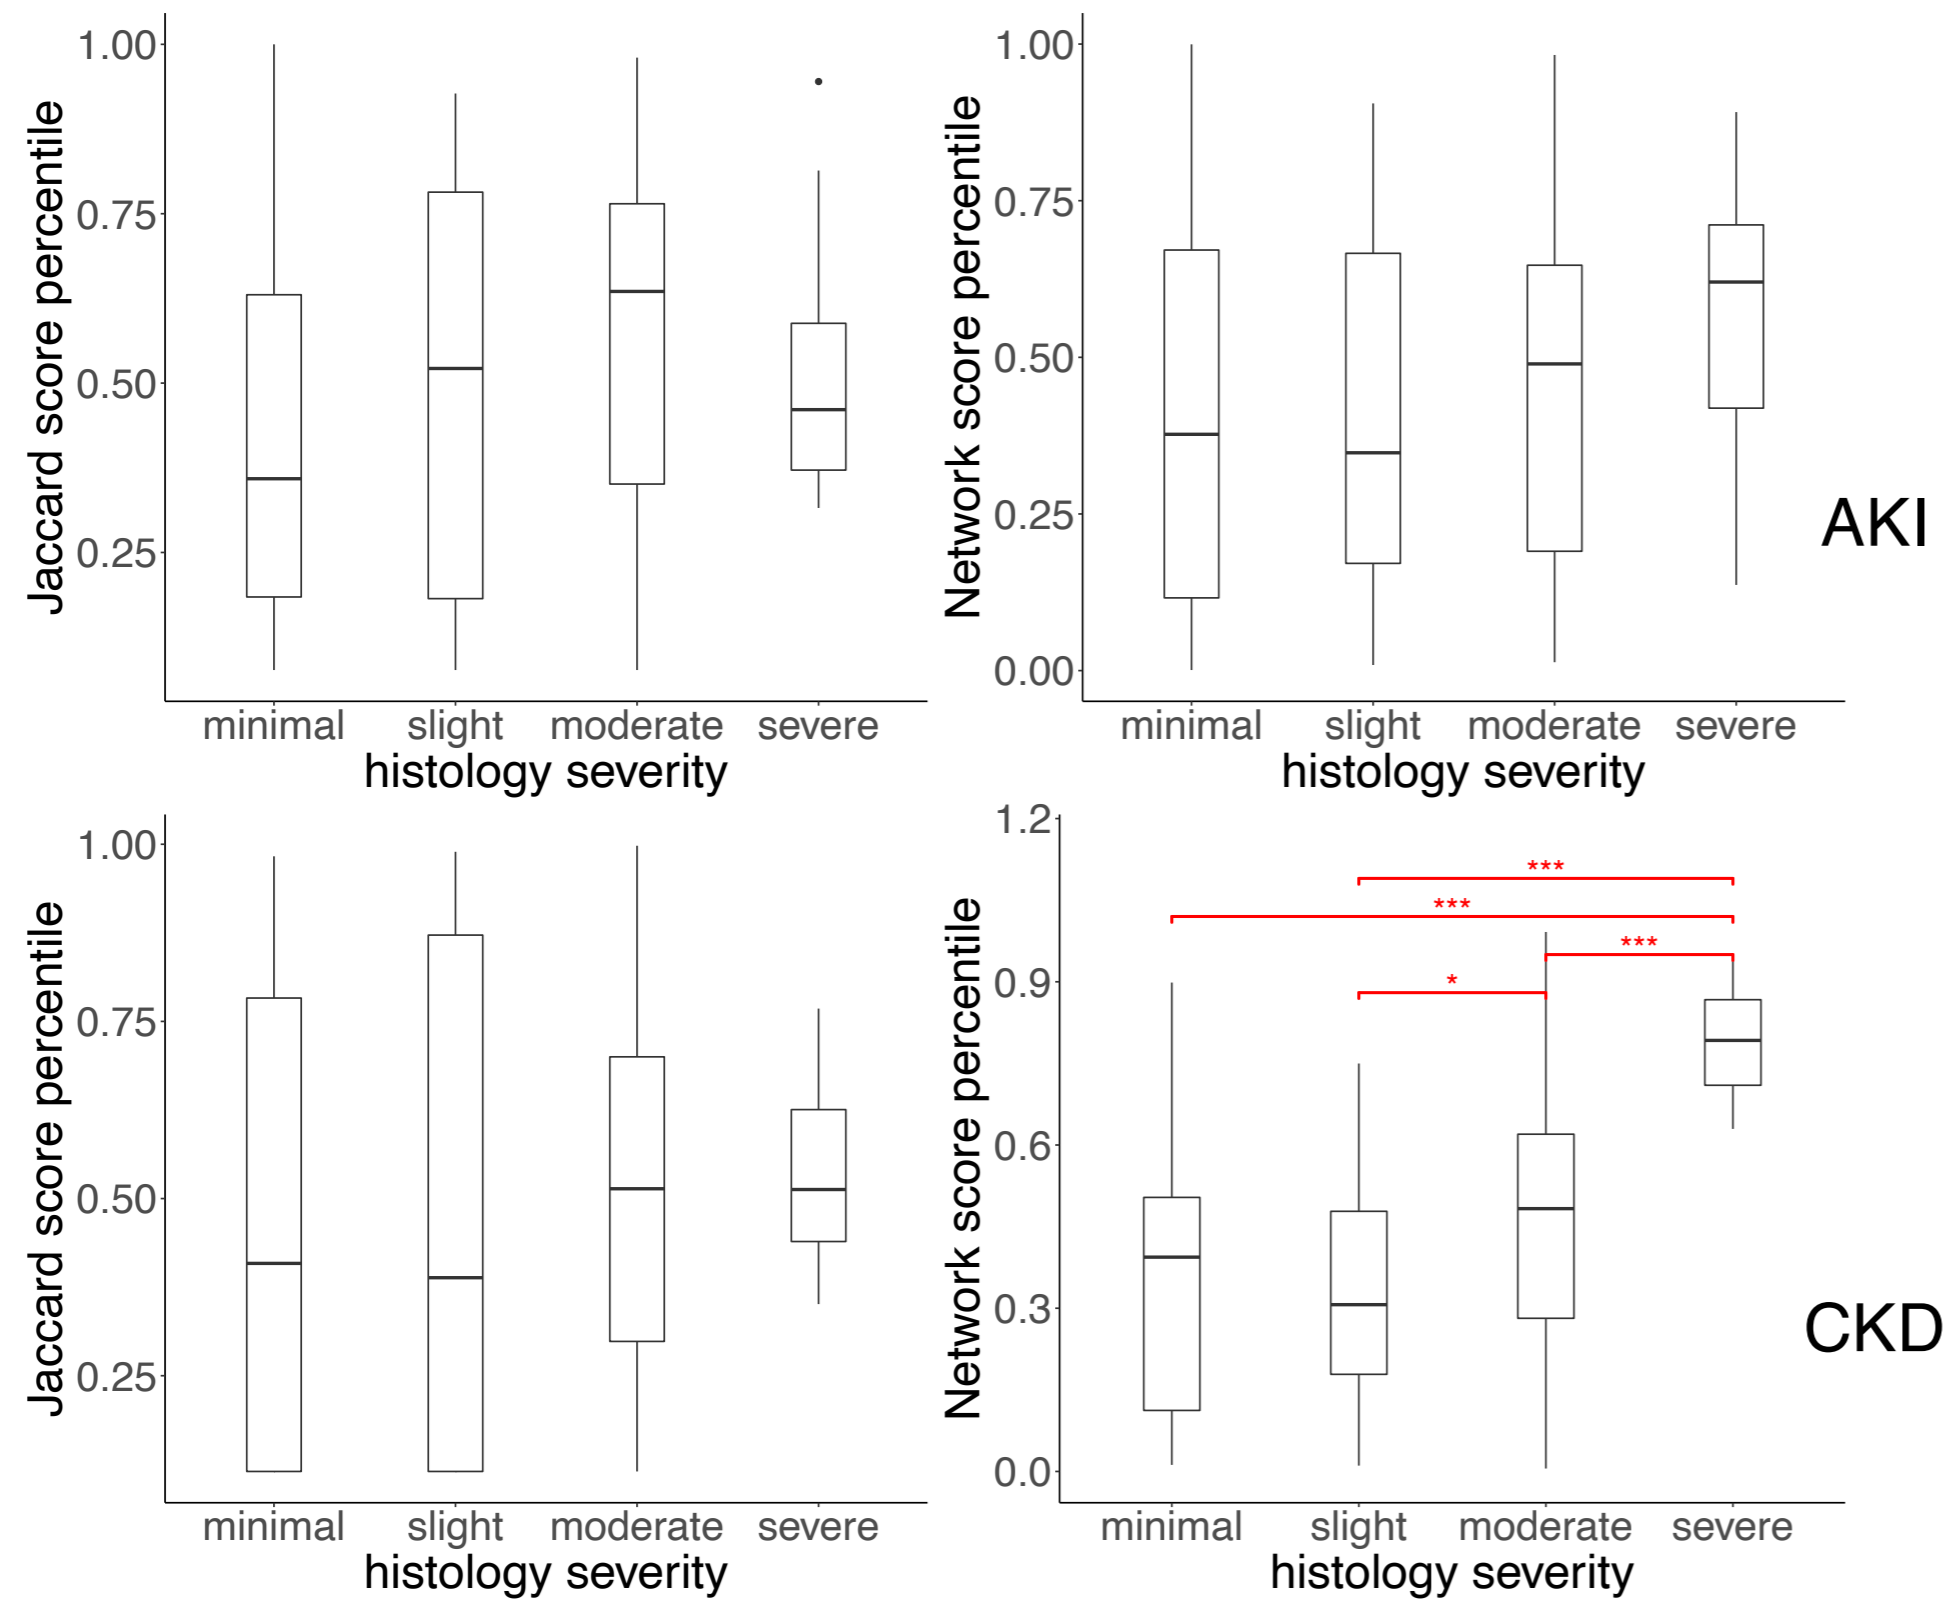**B**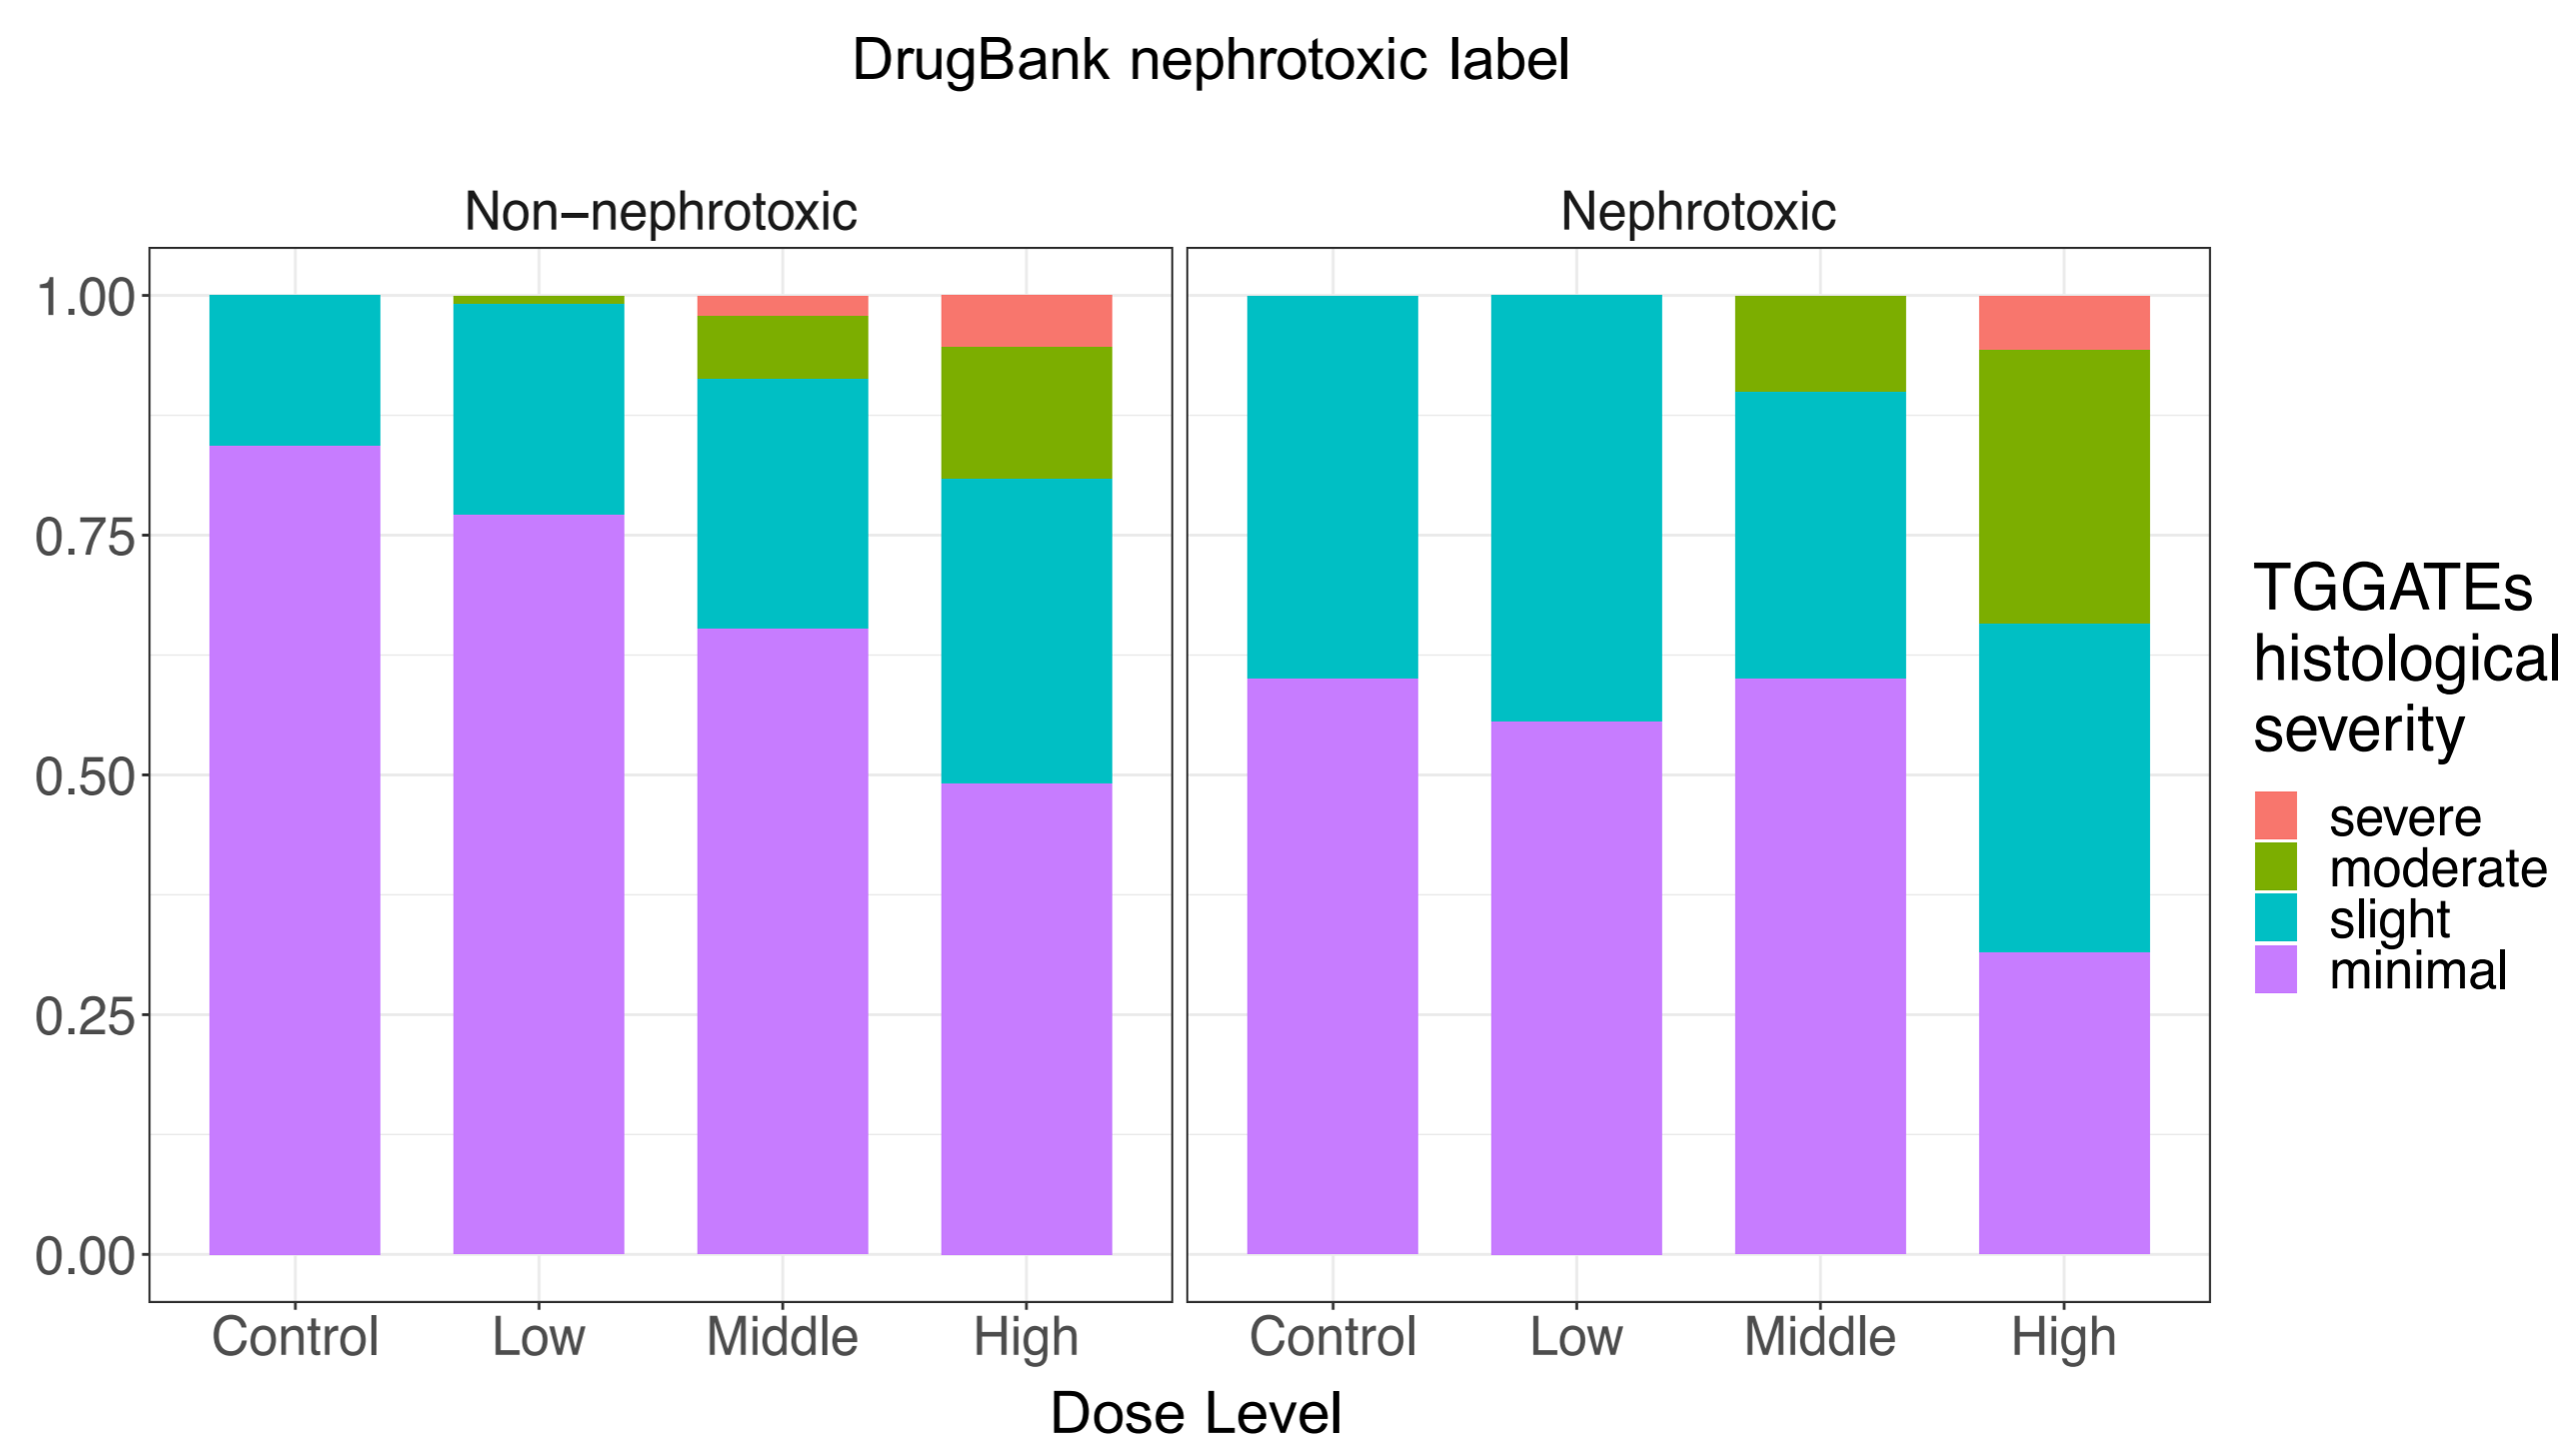**C**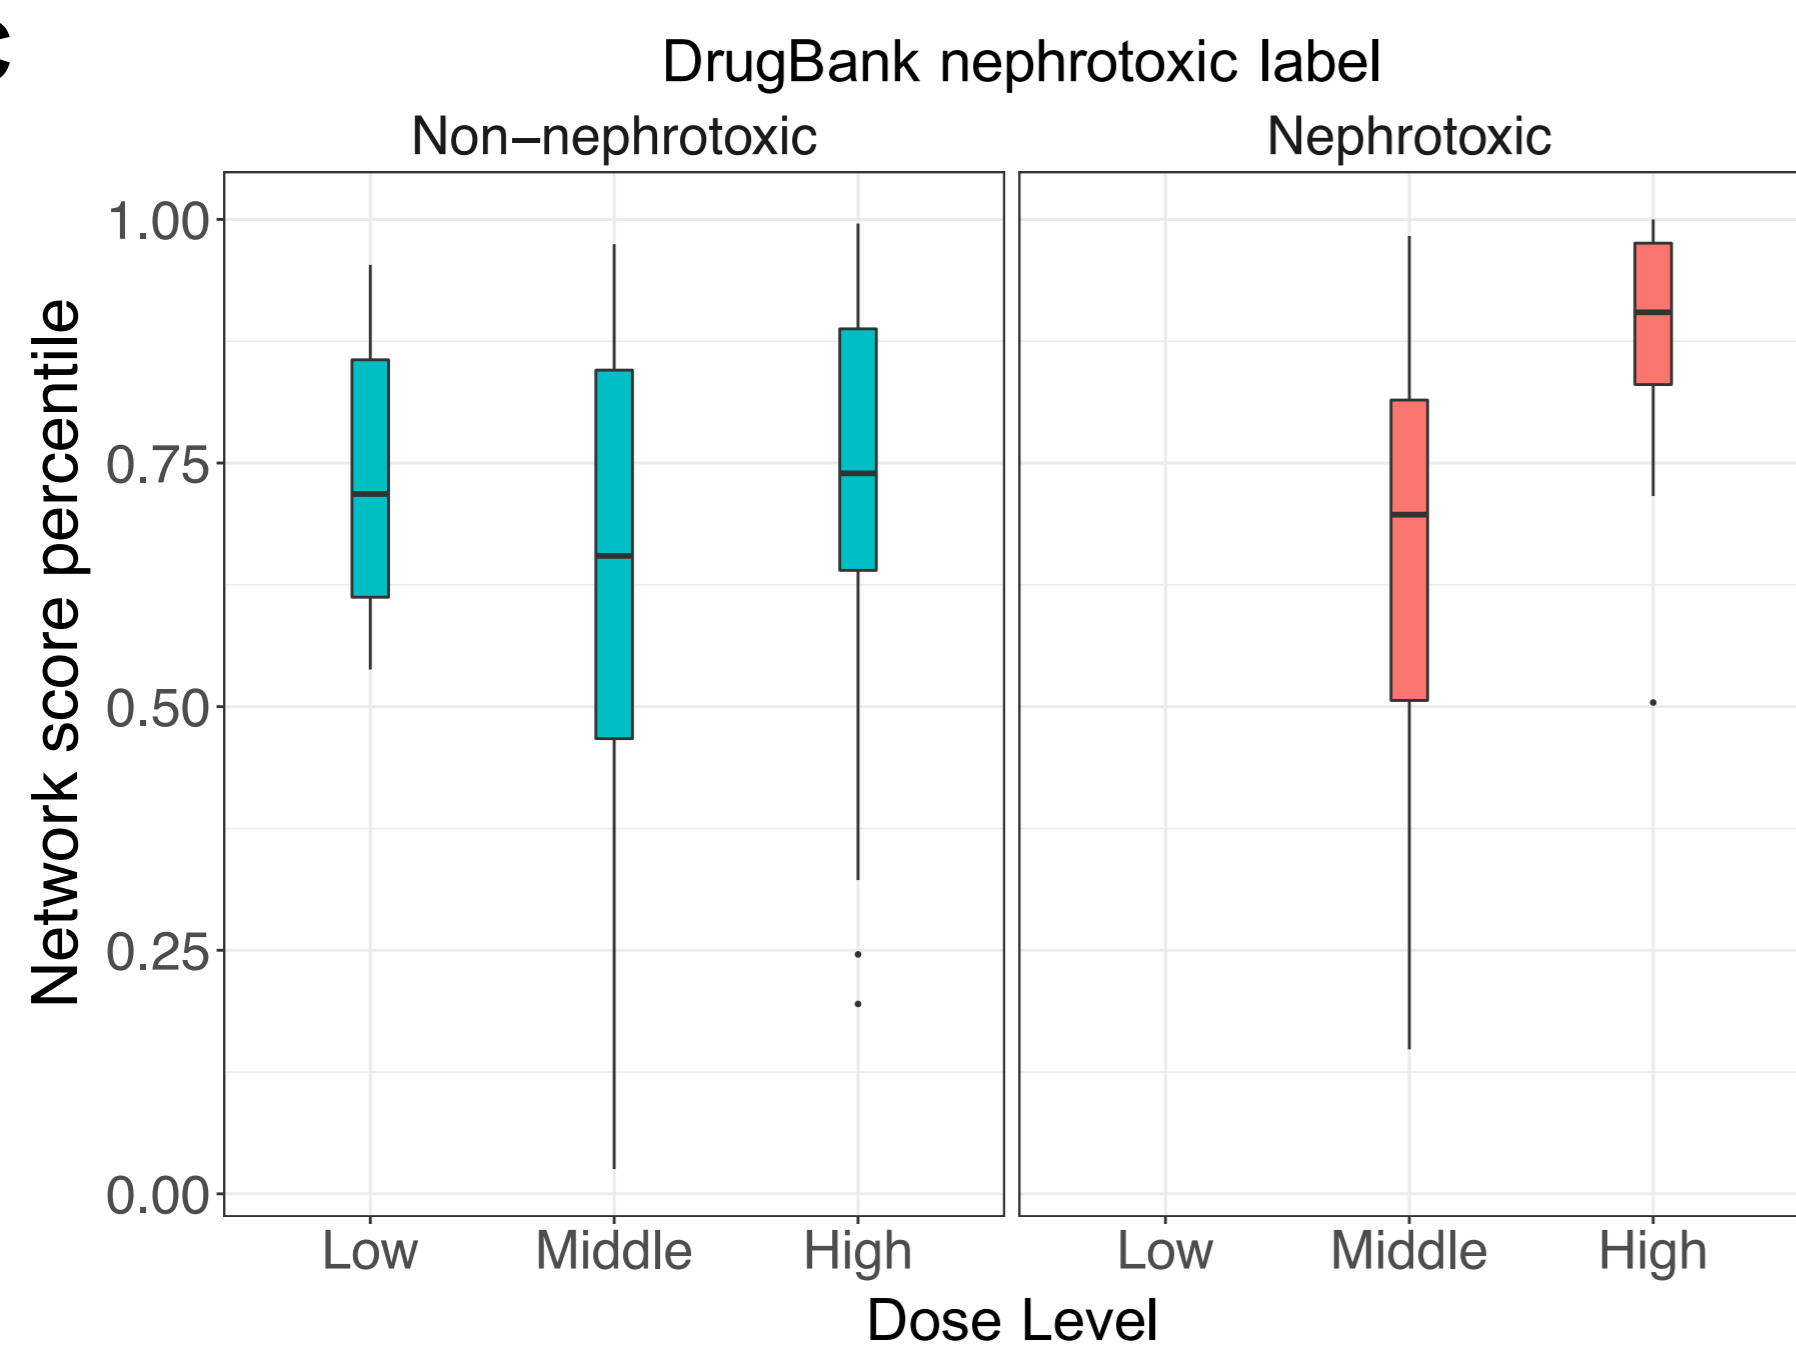**D**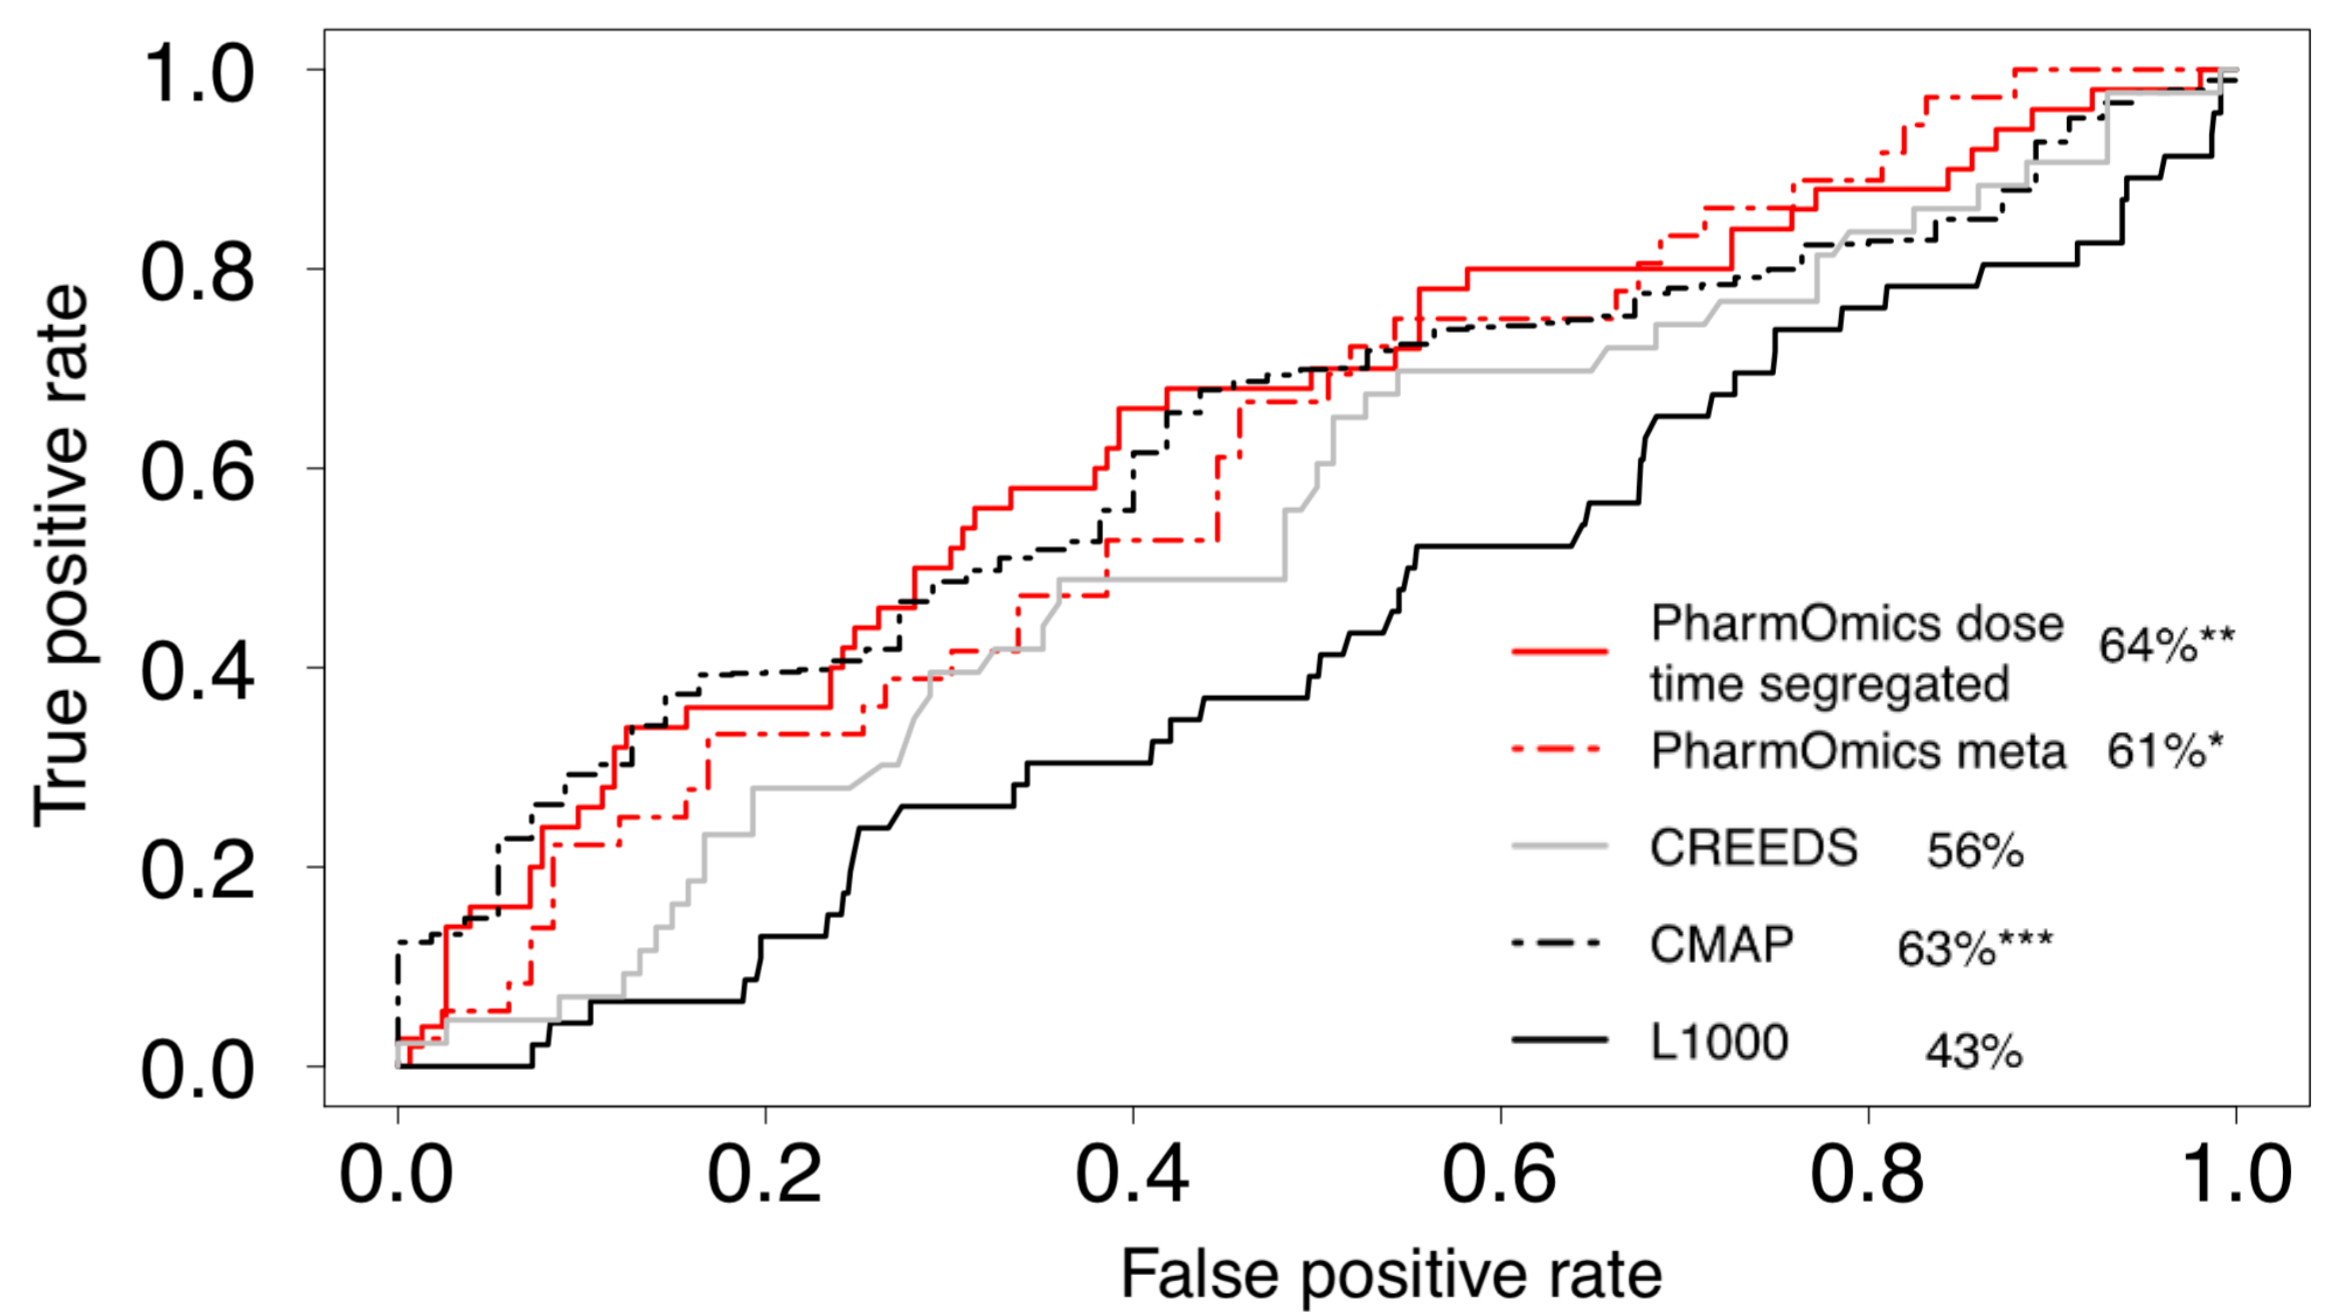**E**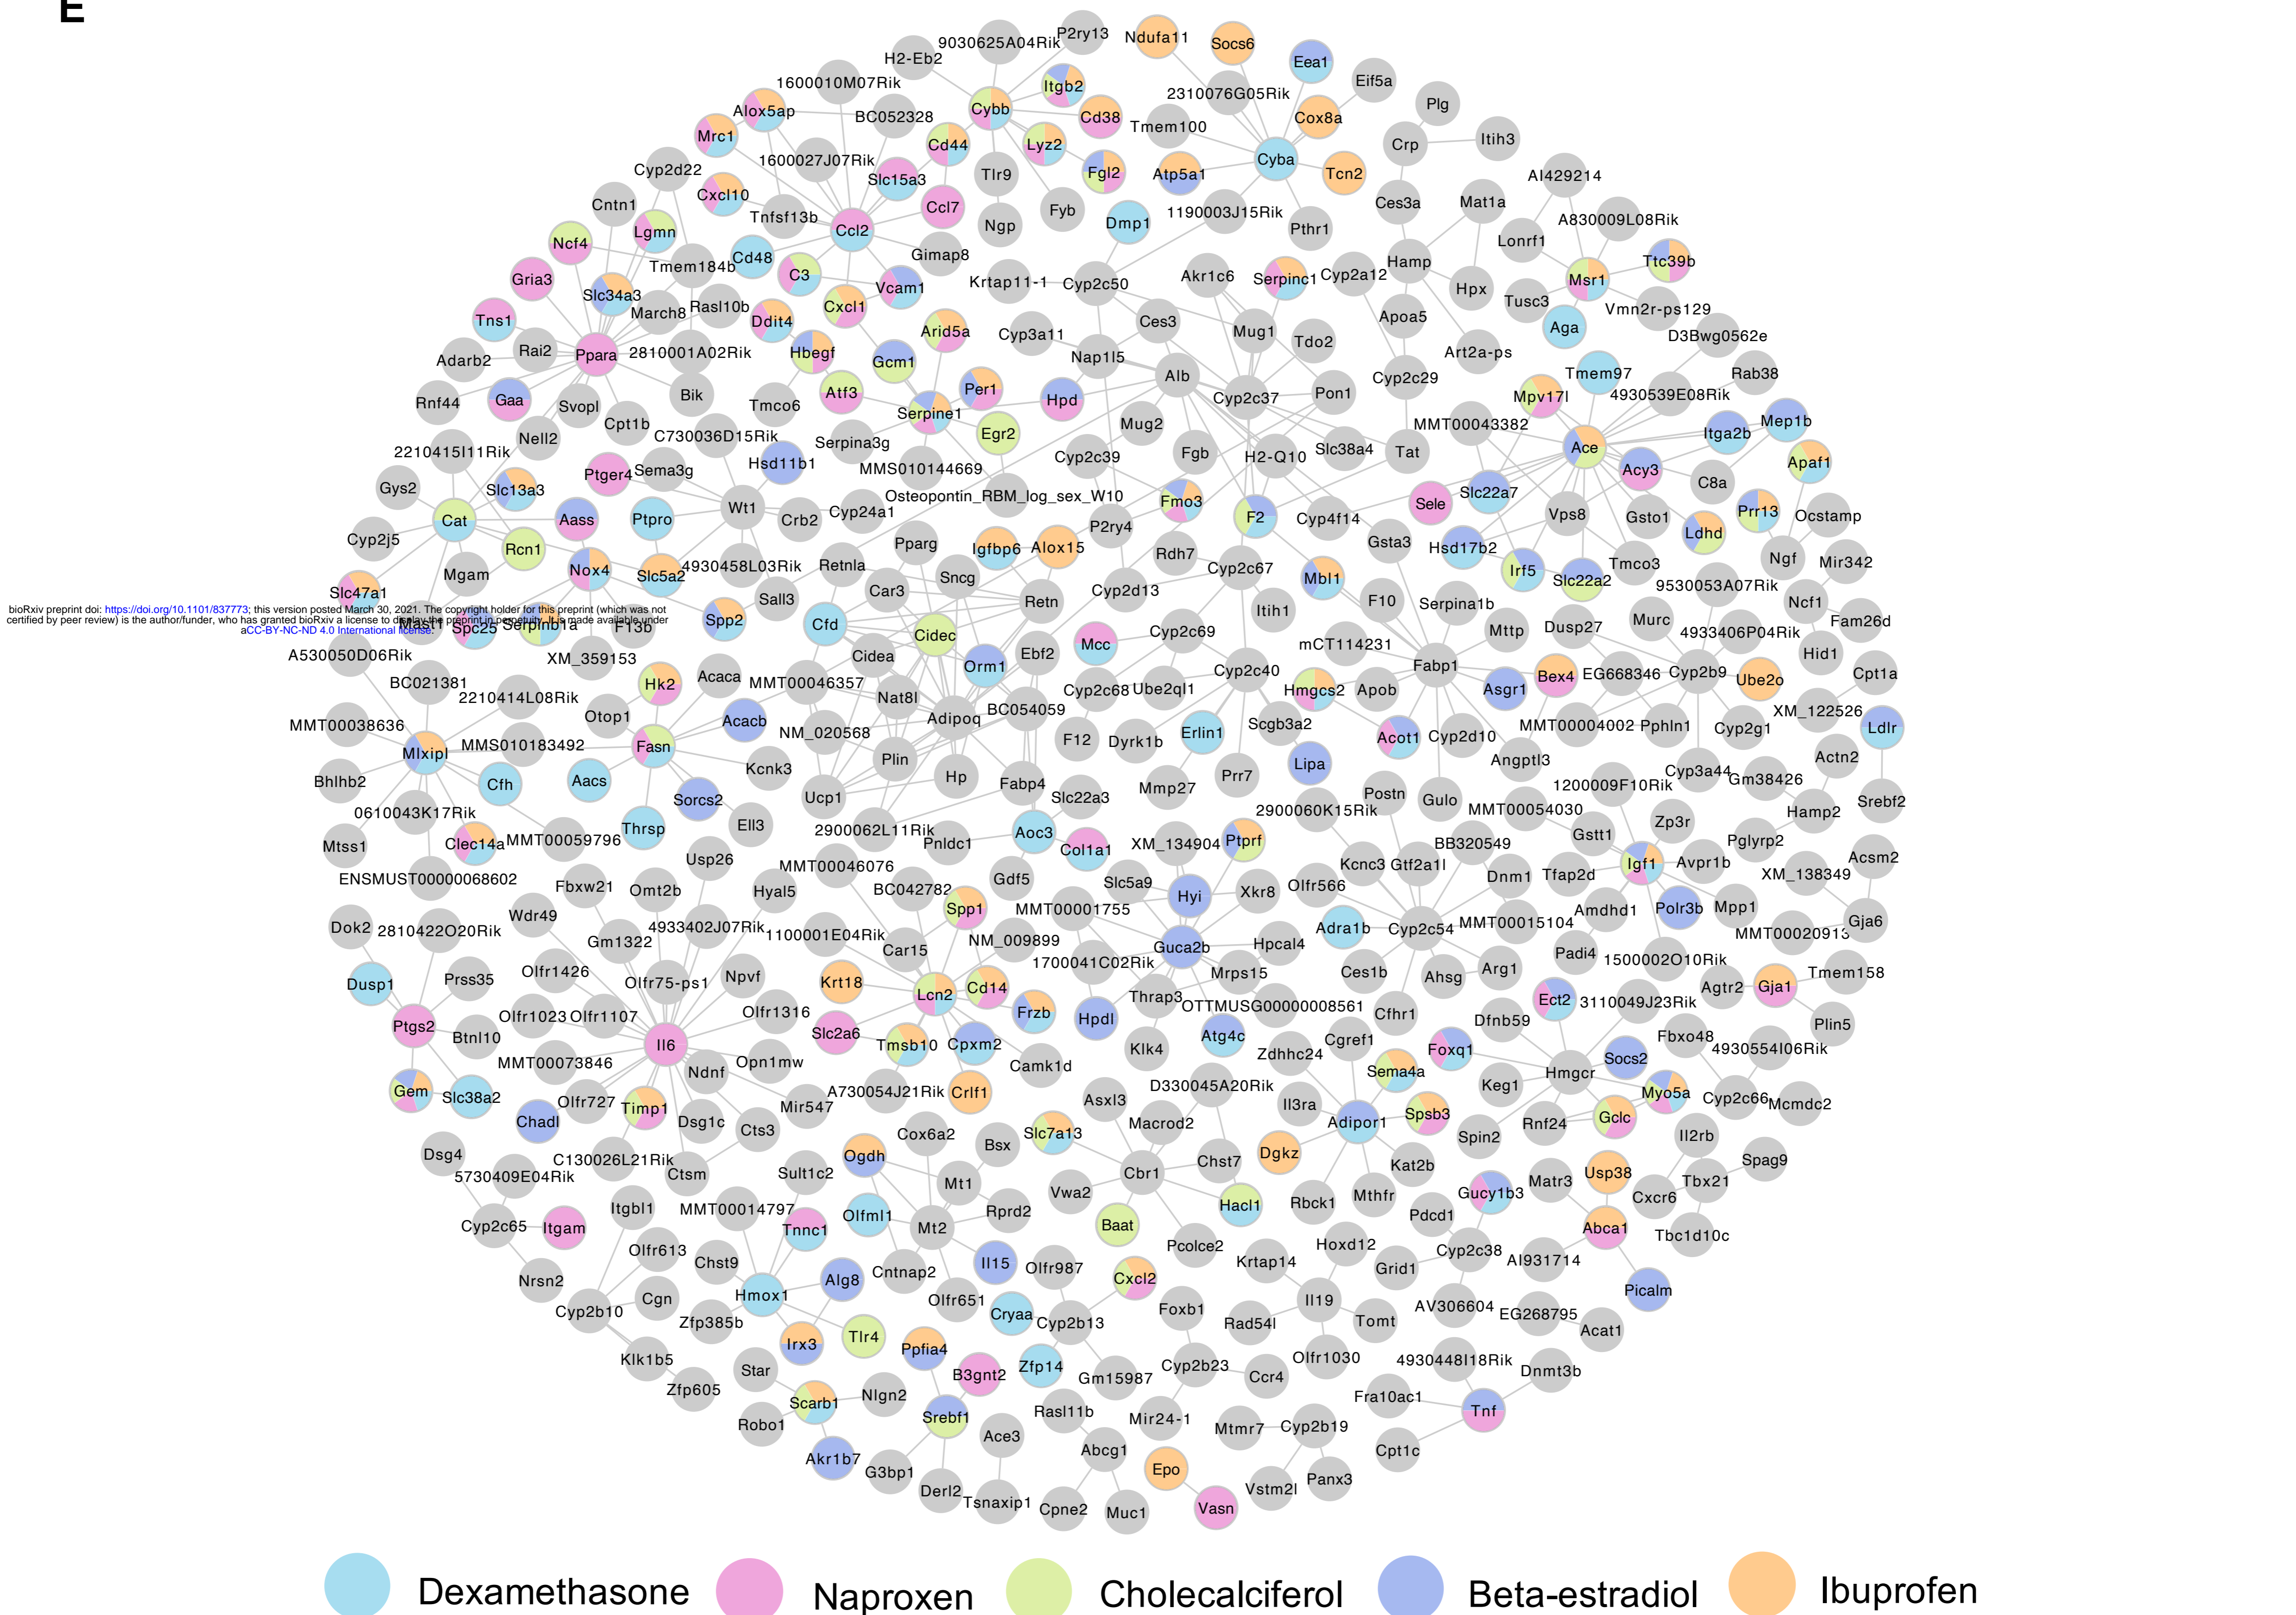



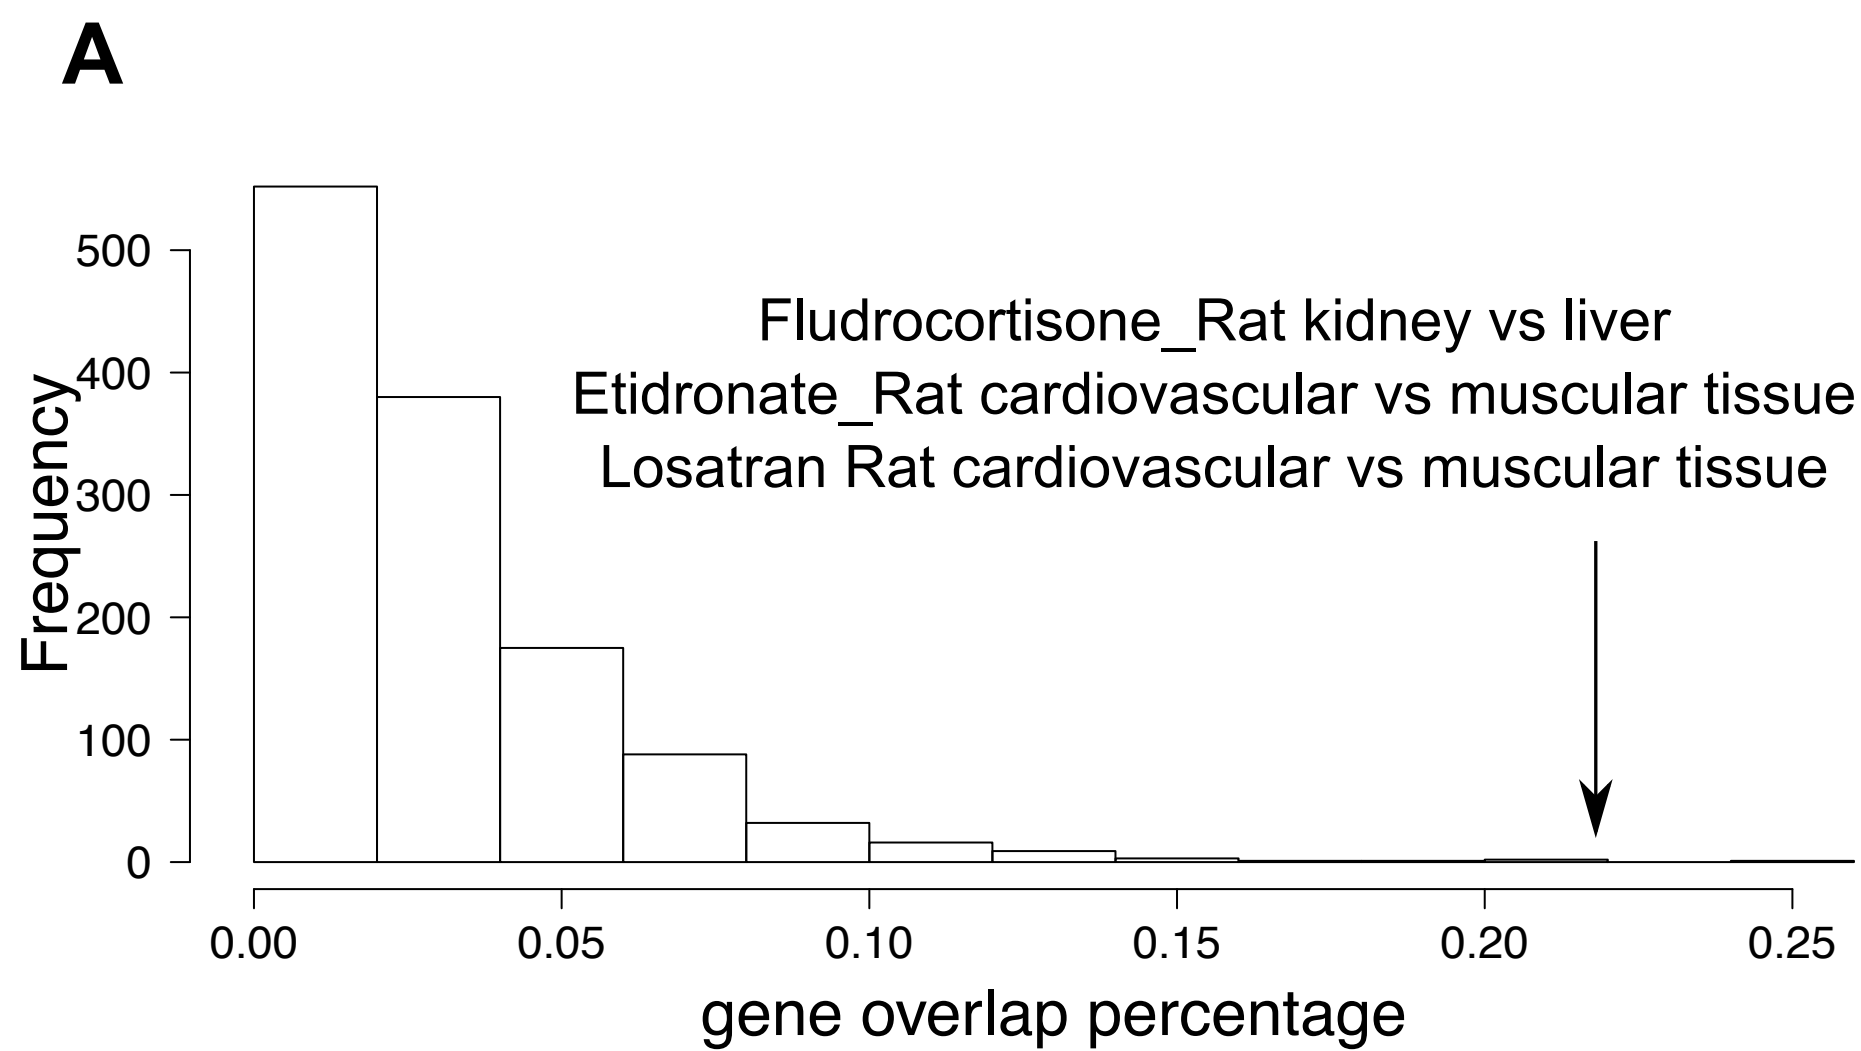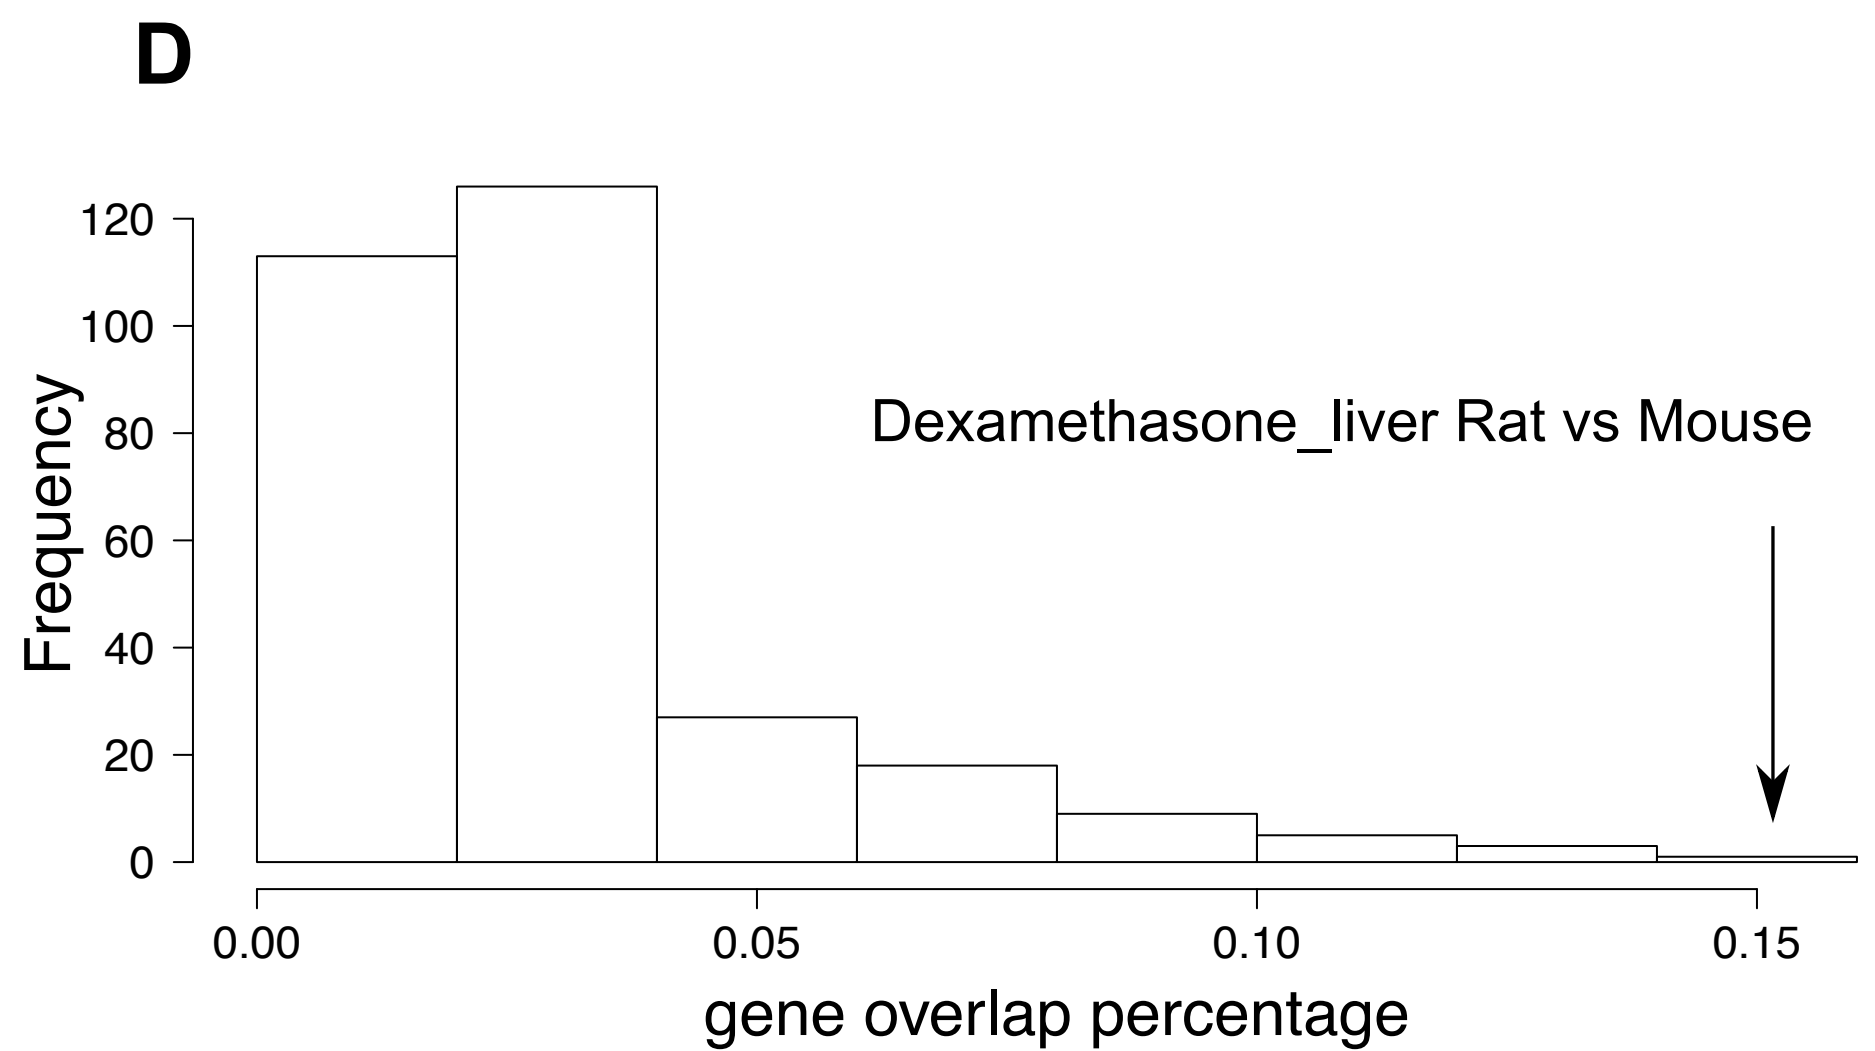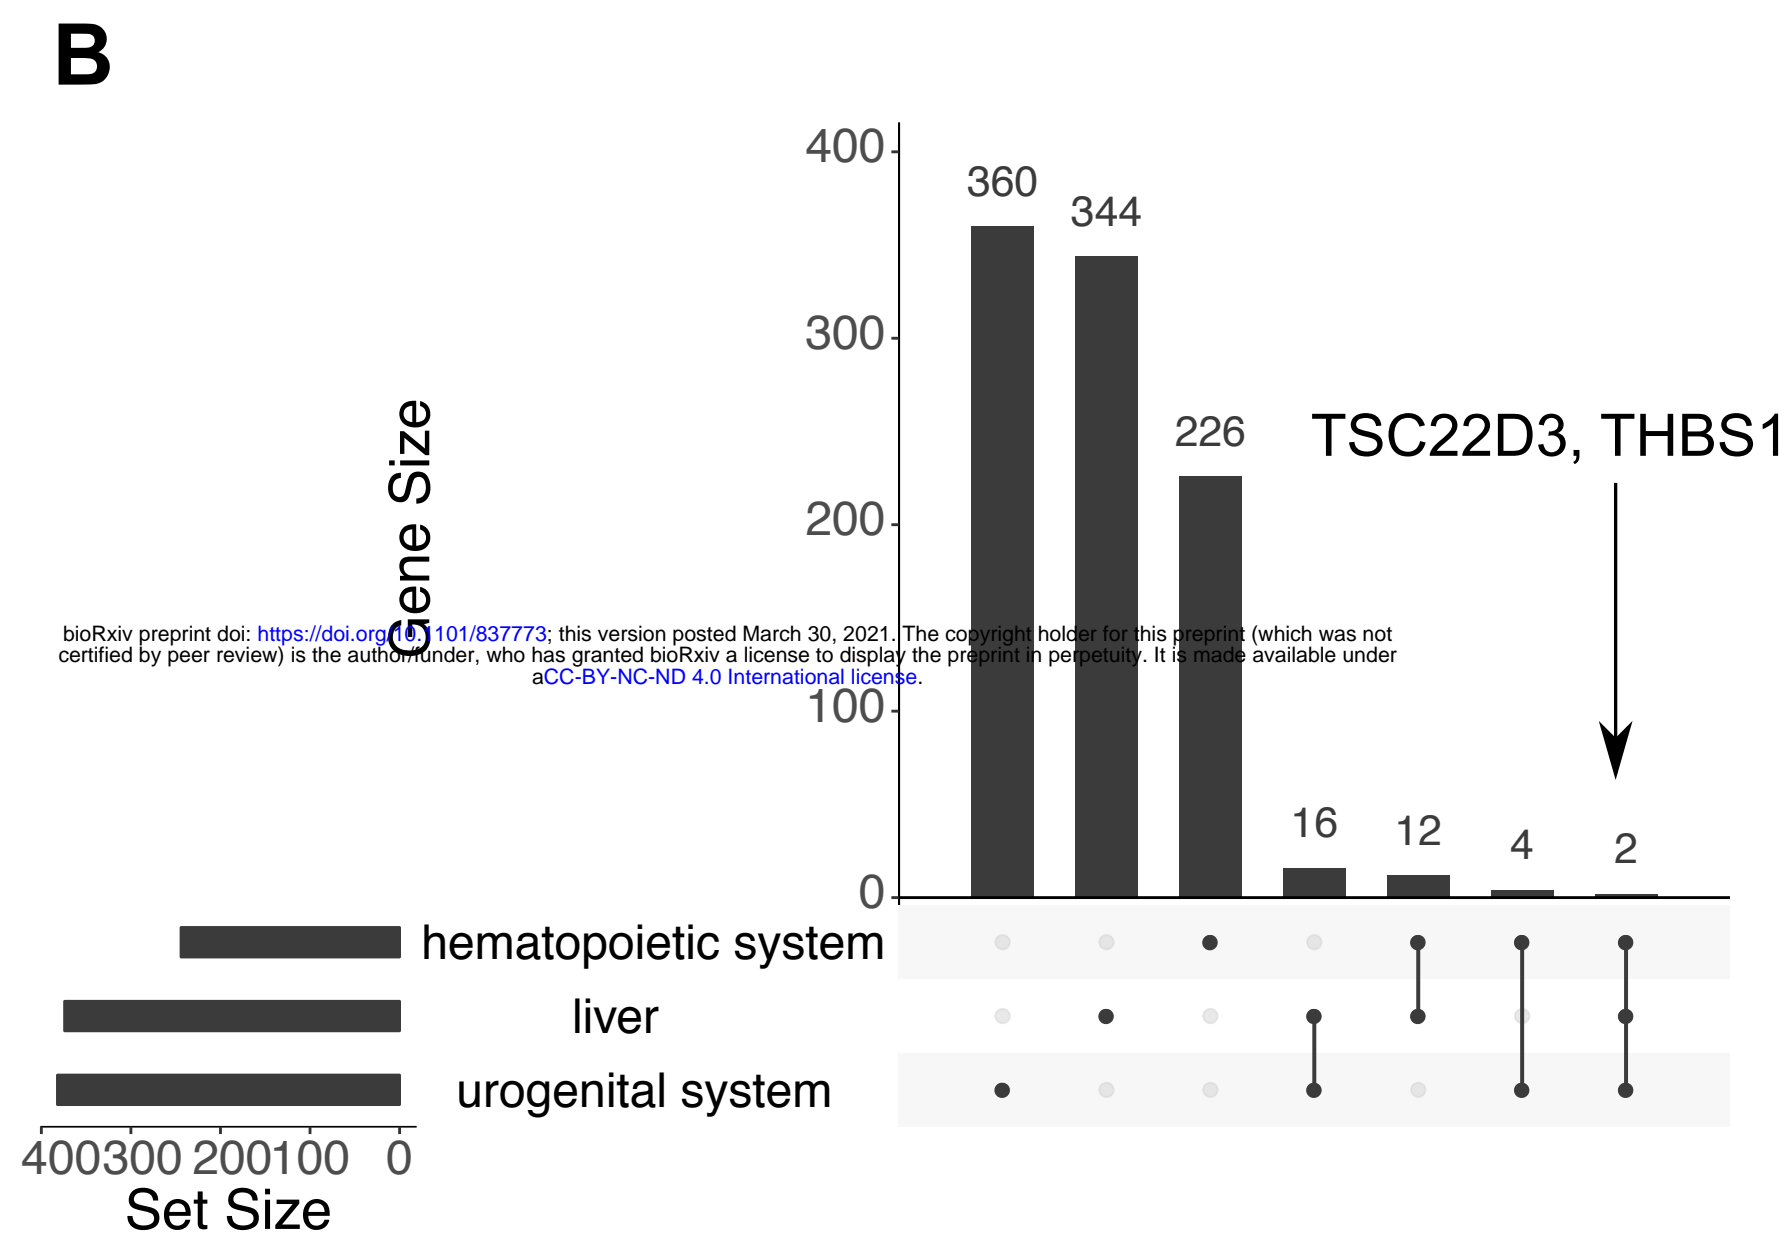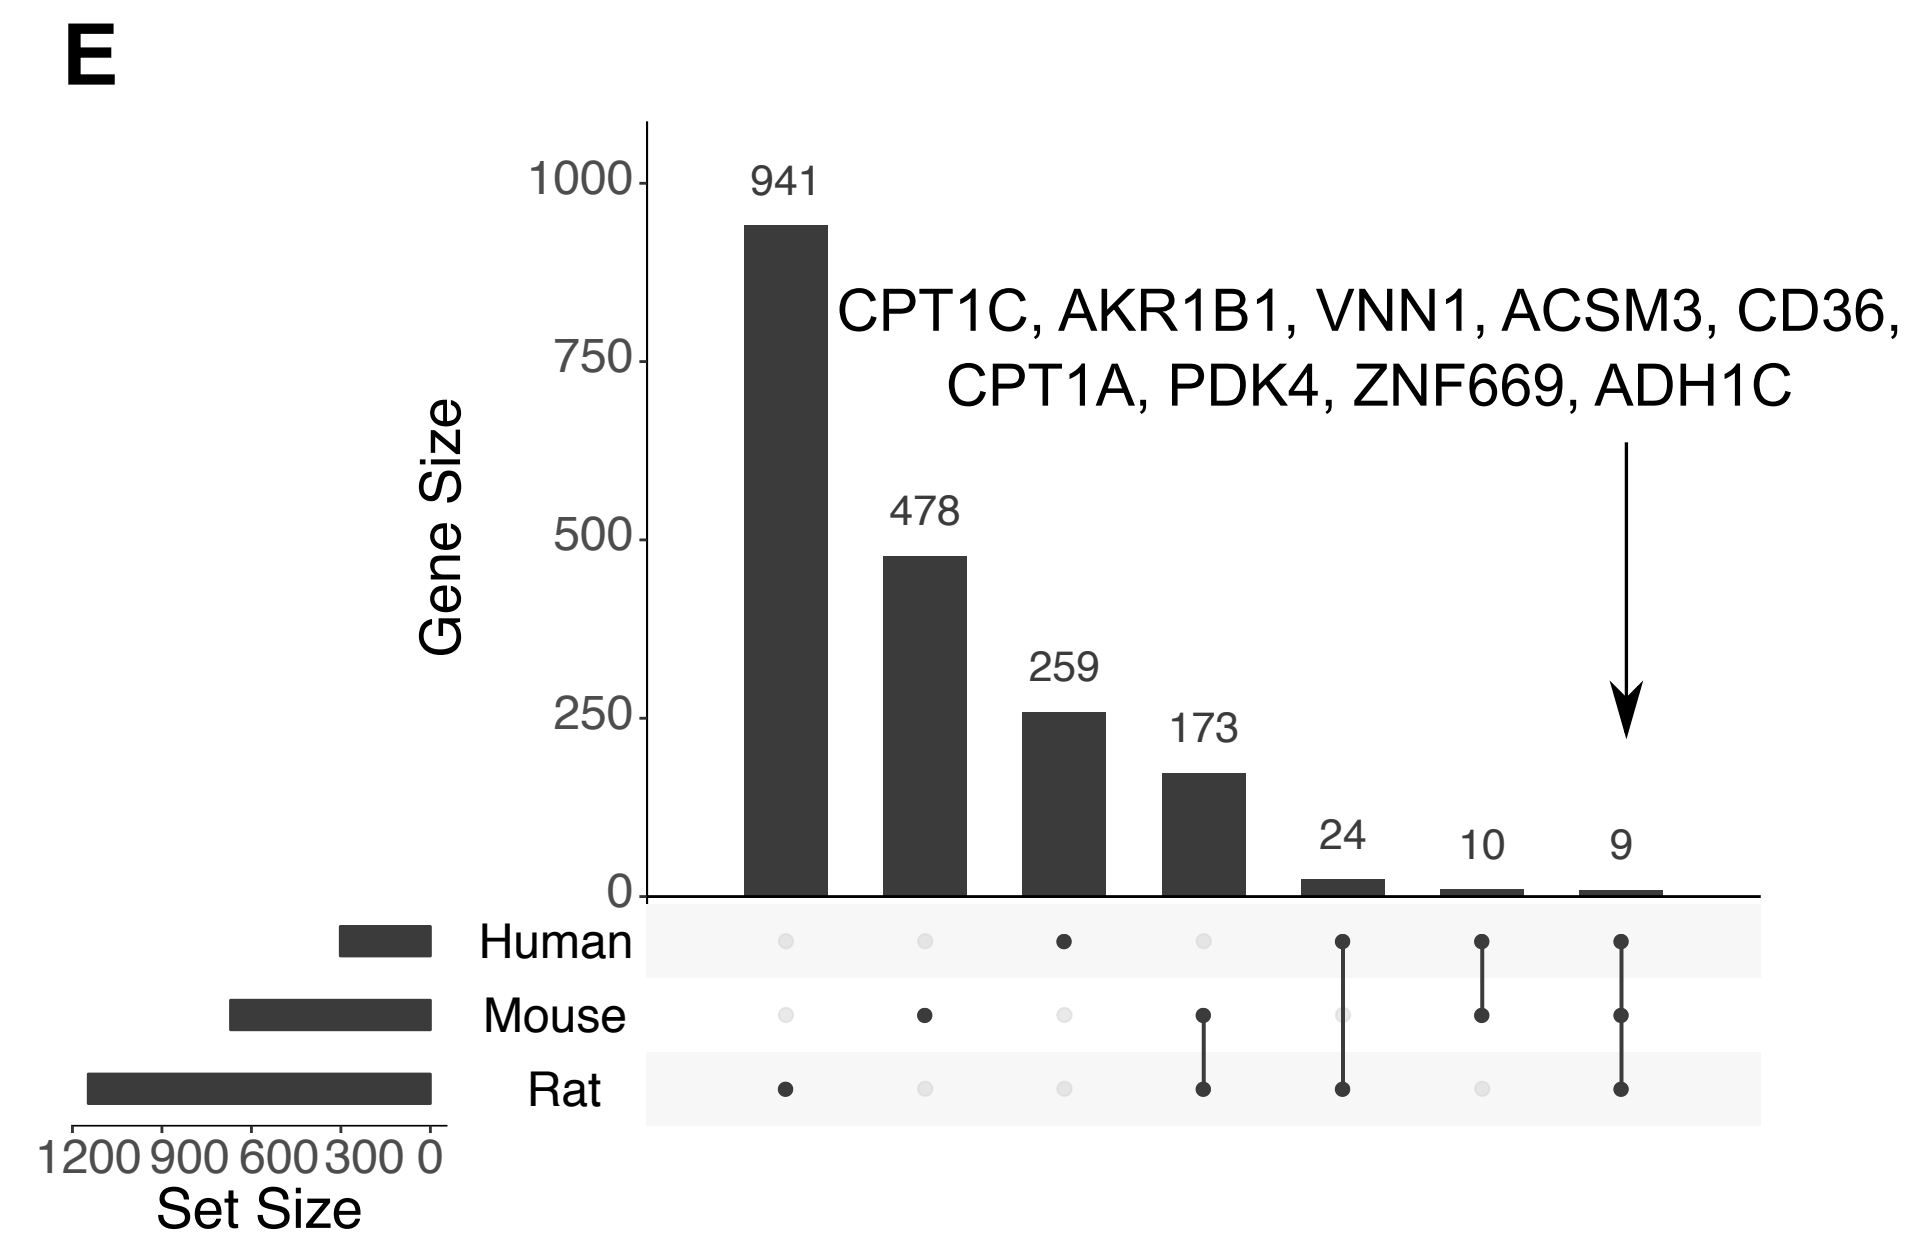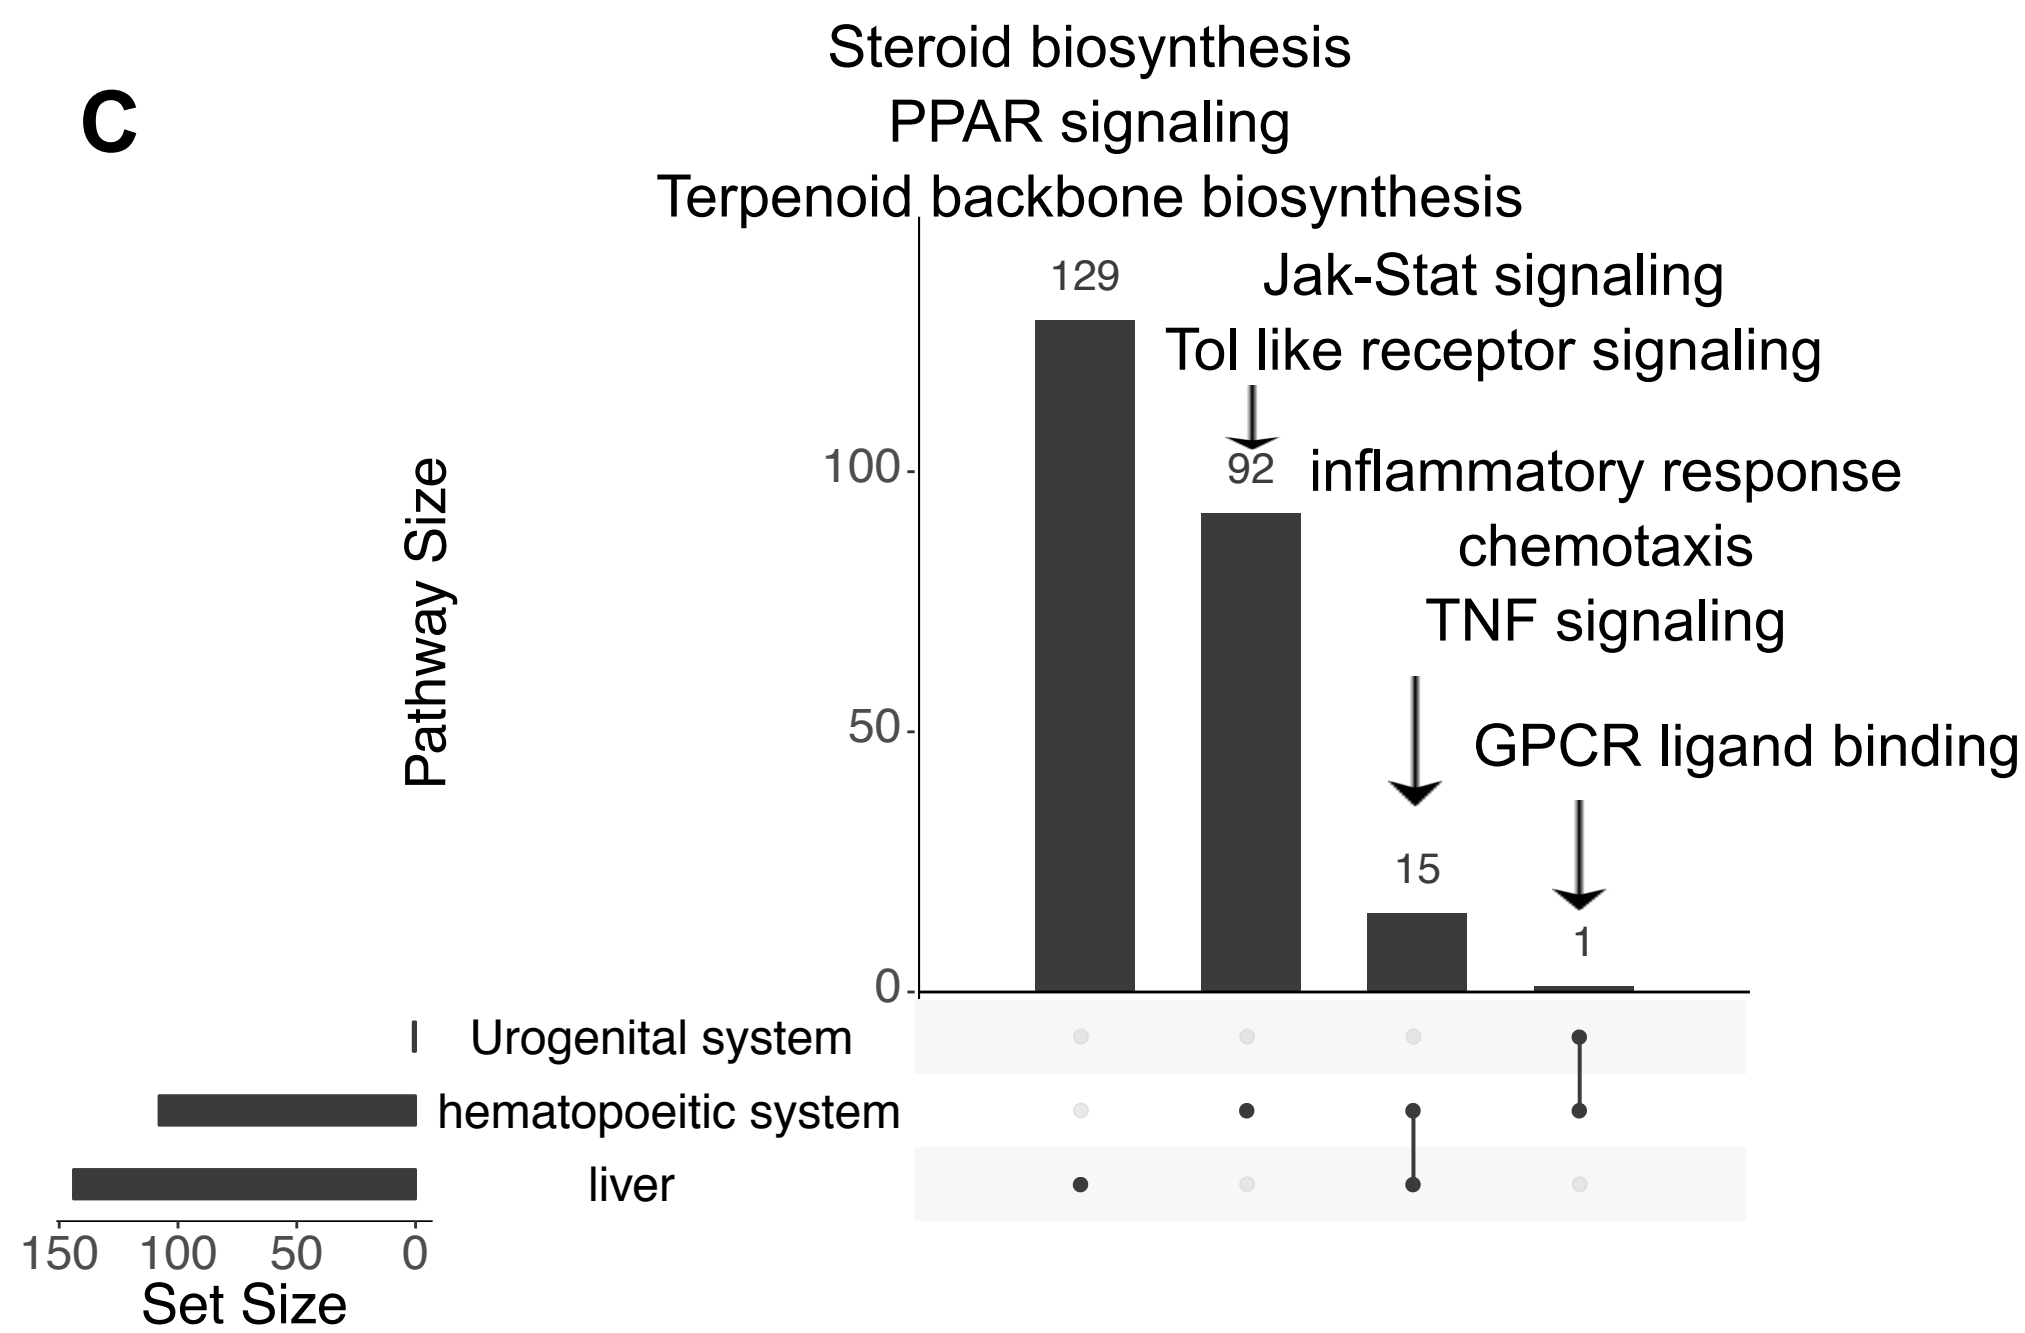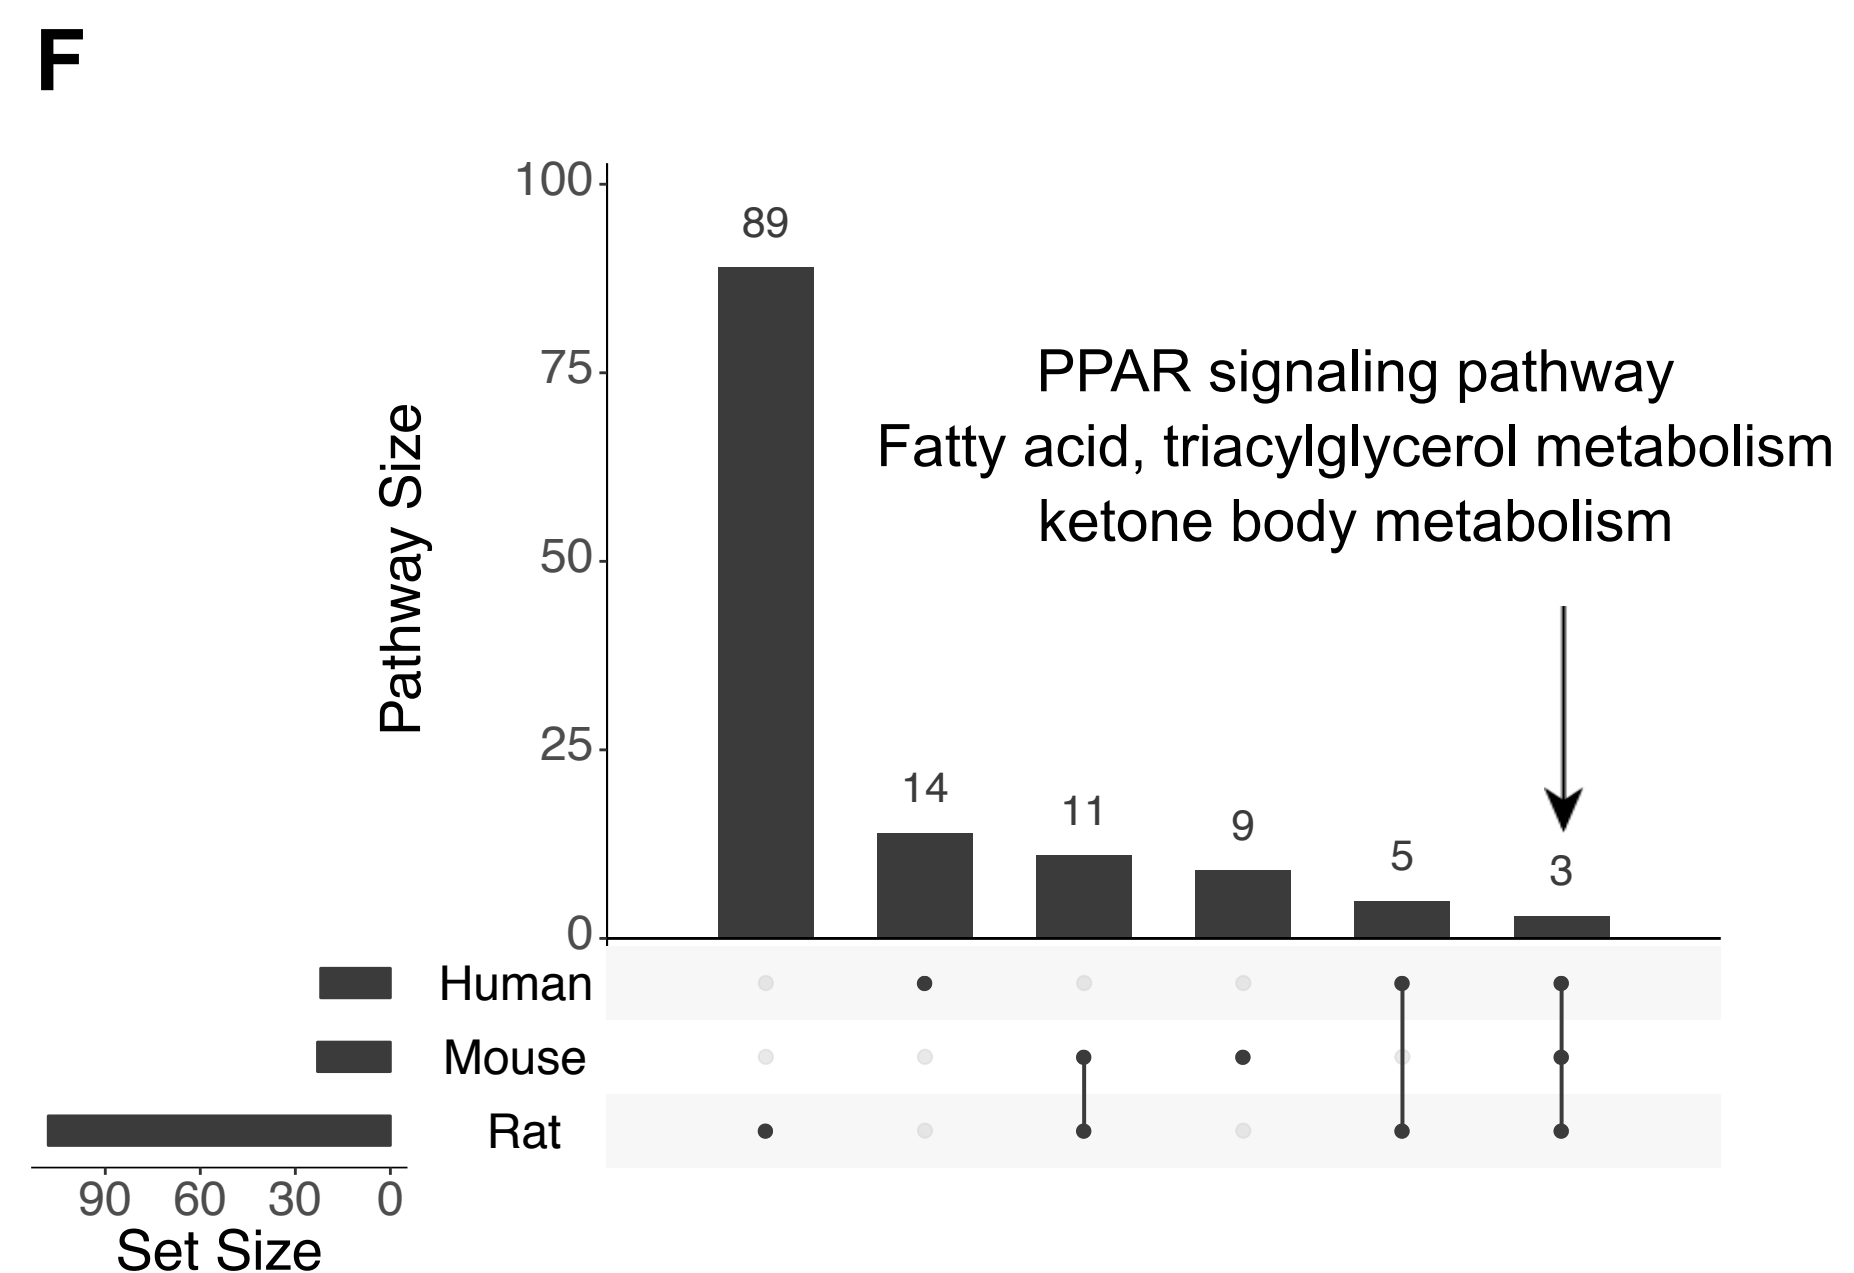

Source: https://www.biorxiv.org/content/biorxiv/early/2021/03/30/837773.full.pdf
